# Supplementary material for: Structure-Based Design of Novel Thiazolone[3,2-a]pyrimidine Derivatives as Potent RNase H Inhibitors for HIV Therapy
Source: MDPI journal article supplement (doi:10.3390/molecules29092120), 2024-05-03
Supplement: s1 [file s1]

# Supporting Information

## Structure-Based Design of Novel Thiazolone[3,2-*a*]pyrimidine Derivatives as Potent RNase H Inhibitors for HIV Therapy

Xuan-De Zhu <sup>1</sup>, Angela Corona <sup>2</sup>, Stefania Maloccu <sup>2</sup>, Enzo Tramontano <sup>2</sup>, Shuai Wang <sup>1</sup>,  
Christophe Pannecouque <sup>3</sup>, Erik De Clercq <sup>3</sup>, Ge Meng <sup>1,\*</sup> and Fen-Er Chen <sup>1,\*</sup>

<sup>1</sup> Engineering Center of Catalysis and Synthesis for Chiral Molecules, Department of Chemistry, Fudan University, Shanghai 200433, China; 21210220029@m.fudan.edu.cn (X.-D.Z.);

shuaiwang@fudan.edu.cn (S.W.)

<sup>2</sup> Department of Life and Environmental Sciences, Department of Applied Science Biosyst, University of Cagliari, 09042, Cagliari, Italy; angela.corona@unica.it (A.C.);

stefania.maloccu@unica.it (S.M.); tramon@unica.it (E.T.)

<sup>3</sup> Rega Institute for Medical Research, KU Leuven, Herestraat 49, B-3000 Leuven, Belgium; christophe.pannecouque@kuleuven.be (C.P.); erik.declercq@kuleuven.be (E.D.C.)

\* Correspondence: mgfudan@fudan.edu.cn (G.M.); rfchen@fudan.edu.cn (F.-E.C.)

## Table of Contents

|                                                                               |    |
|-------------------------------------------------------------------------------|----|
| 1. Molecular Modeling.....                                                    | 3  |
| 2. Molecular Dynamic Simulations.....                                         | 3  |
| 3. Biology Experimental section .....                                         | 4  |
| 3.1 Expression and purification of recombinant HIV-1 RTs. ....                | 4  |
| 3.2 RNase H Polymerase-Independent Cleavage Assay .....                       | 5  |
| 4. Magnesium Complexation .....                                               | 9  |
| 5. <sup>1</sup> H-NMR, <sup>13</sup> C-NMR spectra and HRMS of compounds..... | 10 |

## 1. Molecular Modeling

The Schrödinger Maestro(version 13.7) was used to perform the ensemble docking calculations. The HIV-1 reverse transcriptase X-ray structure used for the experiment had the PDB code: 3QIP. The protein's 3D structure was prepared using the Protein Preparation Workflow. The protein preparation followed a standard protocol: (1) addition of missing hydrogen atoms to the X-ray structure, (2) removal of all crystallographic water, (3) assignment of ionizable state to each titrable groups by PropKa, and (4) energy minimization using OPLS4 force field to optimize all hydrogen-bonding networks. The docking study was performed using Glide-docking module. The small molecule, taken from the PDB structures, was rocked into its corresponding protein structure at the Standard Precision (SP) without the need for any constraints. The stability of the simulation was assessed by monitoring the RMSD with respect to the minimized starting structure. The molecular docking result was generated using PyMol (<http://pymol.sourceforge.net/>).

## 2. Molecular Dynamic Simulations

We obtained the RMSF (Root Mean Square Fluctuation) (Figure 5A, Figure 5B), RMSD (Root Mean Square Deviation) (Figure 5C), dynamic hydrogen bond count (Figure 5D) using the GROMACS software. The RMSF plots (Figure 5A-5B) for p66 and p51 further illustrated the structural fluctuation range of amino acid residues in both peptide chains upon the binding of compound **12b** to the RT enzyme. The dynamics simulation software GROMACS (version 2023.3) was used to investigating the dynamic equilibrium stability of protein-ligand docking. We generated PDB files for the protein, ligand and magnesium ion using the molecular docking structure information obtained from Maestro. In the system environment of Ubuntu 22.04, we selected AMBER14 as the molecular force field. We selected a 0.15M sodium chloride (NaCl) aqueous solution as the environmental system and balanced the charges. We equilibrated the system at a temperature of 310 K and maintained standard atmospheric pressure as the equilibrium pressure. Then we ran the dynamics simulation. After that, we analyzed the simulation trajectory and obtained the results of RMSD, RMSF and numbers of H-bond. The gmx\_MMPBSA(version 1.5.0.3) was used to calculate the binding free energy change. In the term of General namelist variables, we set start frame at "1", the final frame at "5000", the interval as 20 the temperature at 310k.

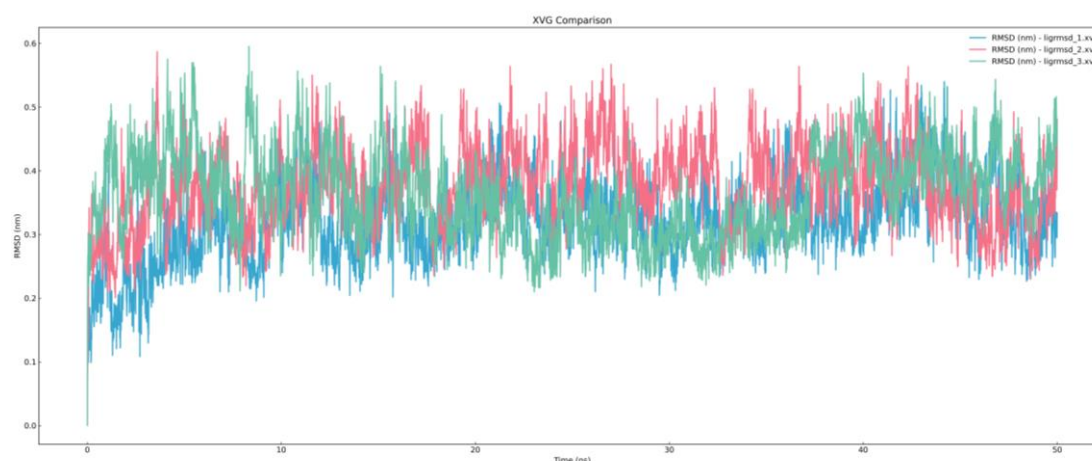

Figure S1. Ligand-RMSD comparison of three-time molecular dynamics simulation.

### 3. Biology Experimental section

#### 3.1 Expression and purification of recombinant HIV-1 RTs.

His-tagged p66/p51 HIV-1 RT group M subtype B coded in a p6HRT-prot plasmid was expressed in the *Escherichia coli* strain M15.<sup>1</sup> Heterodimeric RTs were expressed essentially and purified as described.<sup>2</sup> *E. coli* cells harboring the expression vector were cultured until reaching an optical density at 600 nm of 0.7. Induction of protein expression was achieved by treating the cells with 1.7 mM isopropyl  $\beta$ -D-1-thiogalactopyranoside (IPTG) for a duration of 4 hours. The subsequent purification of the protein was performed using a BioLogic LP system (BioRad) employing a combination of immobilized metal affinity chromatography and ion exchange chromatography.

To initiate the purification process, the cell pellets were resuspended in lysis buffer at a ratio of 1:2 (cell pellet volume: lysis buffer volume). The lysis buffer used consisted of 50 mM sodium phosphate buffer with a pH of 7.8, supplemented with 0.5 mg/ml lysozyme. The resuspended cells were incubated on ice for 20 minutes. Following this, NaCl was added to achieve a final concentration of 0.3 M. The cells were then subjected to sonication, with four cycles of 60 seconds each, alternating between one second on and one second off. Subsequently, the cell lysate was centrifuged at 30,000 $\times$ g for 1 hour.

The supernatant obtained from the centrifugation step was loaded onto a Ni<sup>2+</sup>-NTA-Sepharose column that had been pre-equilibrated with a loading buffer consisting of 50 mM sodium phosphate buffer (pH 7.8), 0.3 M NaCl, 10% glycerol, and 10 mM imidazole. The column was washed with a buffer containing 50 mM sodium phosphate buffer (pH 6.0), 0.3 M NaCl, 10% glycerol, and 80 mM imidazole. The target protein, RT, was eluted using an imidazole gradient ranging from 0.08 M to 0.5 M in the wash buffer. Fractions containing the enzyme were collected and combined, and then diluted 1:1 with 50 mM sodium phosphate buffer (pH 7.0) containing 10% glycerol. The diluted protein sample was loaded onto a Hi-trap heparin HP column that had been pre-equilibrated with 10 column volumes of a loading buffer consisting of 50 mM sodium phosphate buffer (pH 7.0), 10% glycerol, and 150 mM NaCl. The column was washed with the loading buffer, and the RT enzyme was eluted using Elute Buffer 2, which

comprised 50 mM sodium phosphate buffer (pH 7.0), 10% glycerol, and 1 M NaCl. The eluted fractions containing the purified protein were collected, and the protein was subsequently dialyzed and stored in a buffer composed of 50 mM Tris-HCl (pH 7.0), 25 mM NaCl, 1 mM EDTA, and 50% glycerol. The catalytic activities of the purified protein samples were determined, and aliquots were stored at -80 °C for further use.

### **3.2 RNase H Polymerase-Independent Cleavage Assay**

The HIV-1 RT-associated RNase H activity was measured as described.<sup>3</sup> In summary, the reaction was performed in a black 96-well plate with a total volume of 100  $\mu$ L. The reaction mix consisted of 50 mM Tris HCl (pH 7.8), 6 mM MgCl<sub>2</sub>, 1 mM dithiothreitol (DTT), 80 mM KCl, and 250 nM hybrid RNA/DNA substrate (50-GTTTTCTTTTCCCCCTGAC-30-Fluorescein, 50-CAAAAGAAAAGGGGGGACUG-30-Dabcyl). Serial dilutions of compounds were added to the reaction mix. The reaction was initiated by adding 20 ng of HIV-1 wt RT, 20 ng of R448A RT, 20 ng of K451A RT, 40 ng of K540 RT, 60 ng of Q475A RT, 500 ng of N474A RT, 500 ng of Y501A RT, and 500 ng of W535A RT. The reaction mixture was then incubated at 37 °C for 1 hour. The products of the reaction were quantified using a Perkin-Elmer Victor 3 multilabel counter plate reader, with excitation and emission wavelengths set at 490/528 nm. The experiments were performed in duplicate and replicated at least two times to ensure reliability. The data obtained were analyzed according to the described methodology.<sup>4</sup> Dose response curves were fitted to a nonlinear regression of (log10) dose vs normalized response-variable slope. Assay quality was assessed using the Z'-factor calculation with  $Z' > 0.5$  as the threshold for acceptance. Mean  $\pm$  standard deviation of IC<sub>50</sub> values were determined, and p values were calculated between the IC<sub>50</sub> value against the wt and IC<sub>50</sub> value against the mutants by paired, two-tailed *t* tests using GraphPad Prism 6.01 software (GraphPad Software, Inc.; San Diego, CA). Figures were made with GraphPad Prism 6 version 6.01.

A

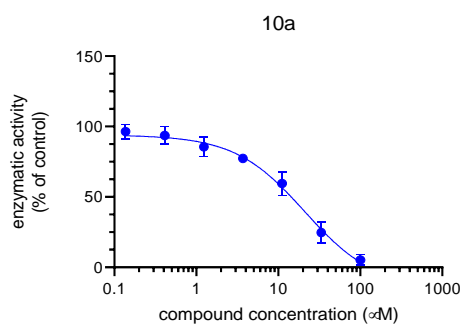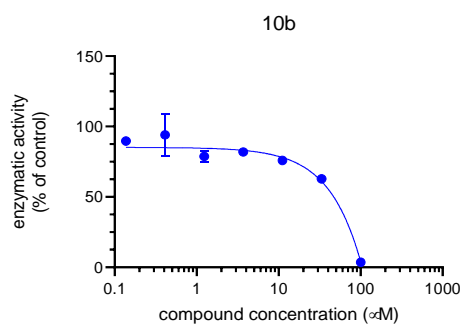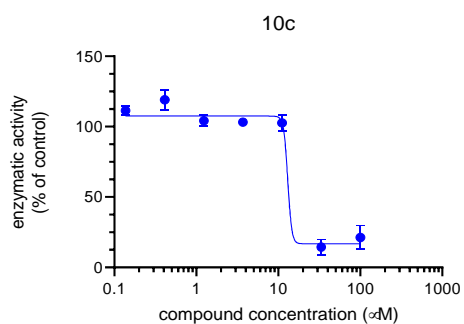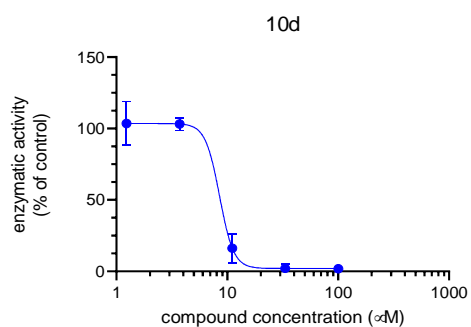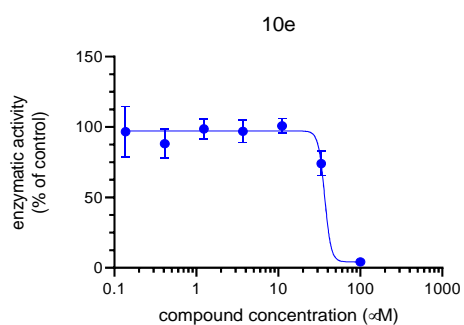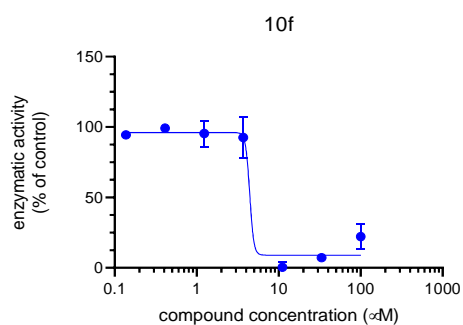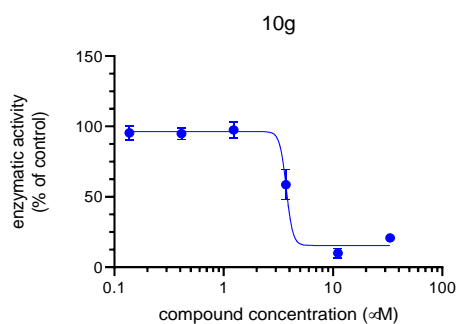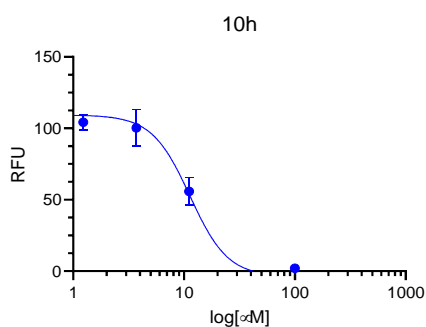

B

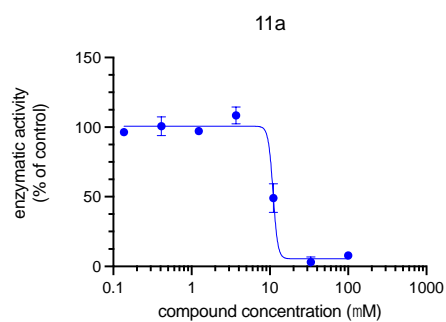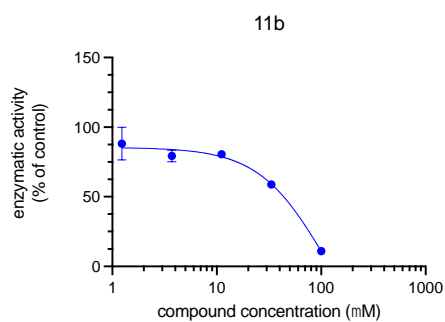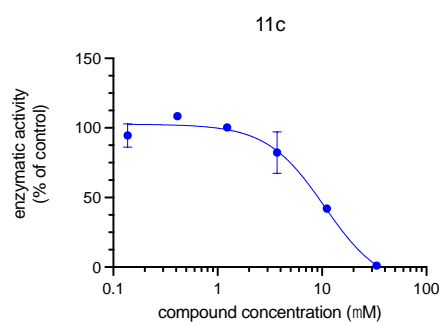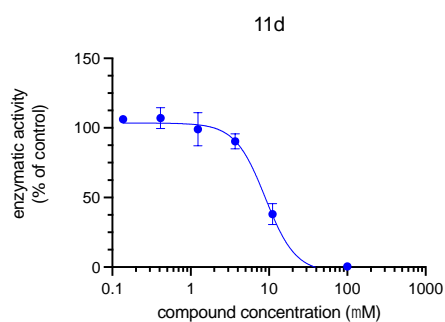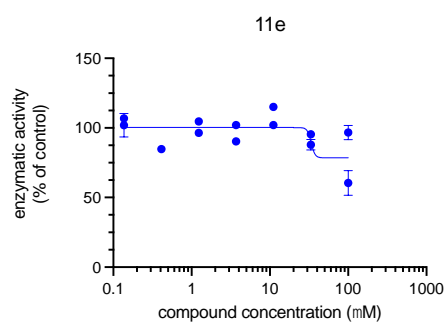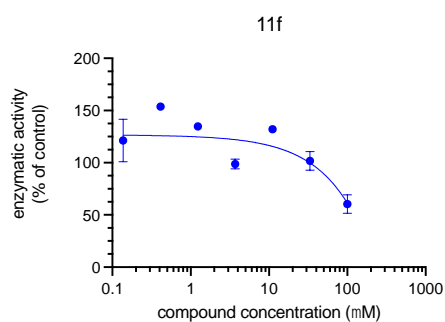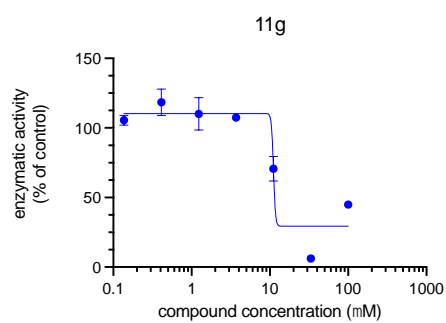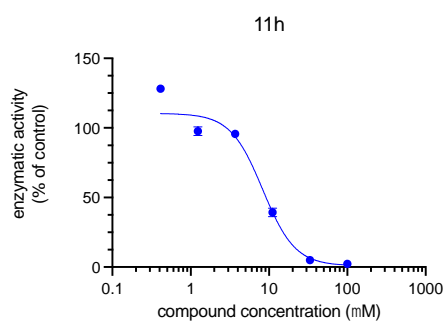

C

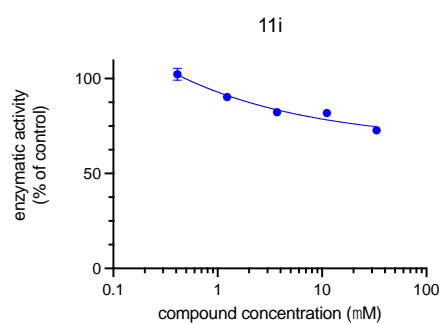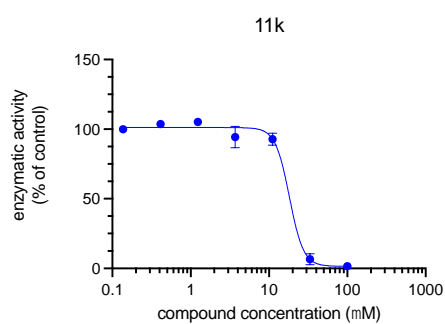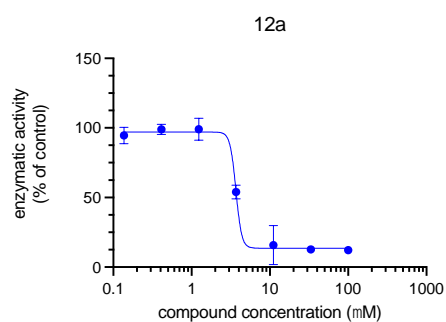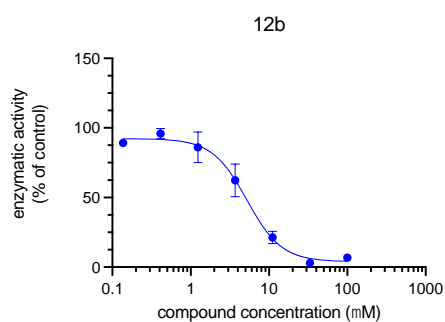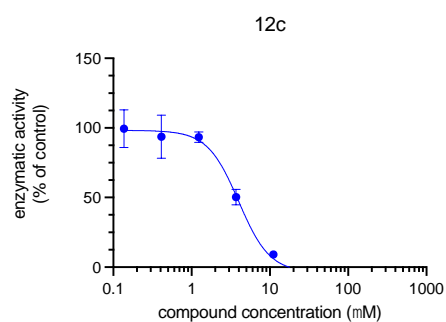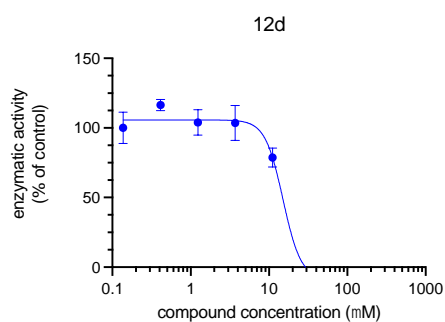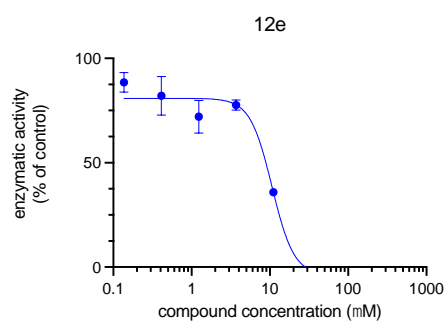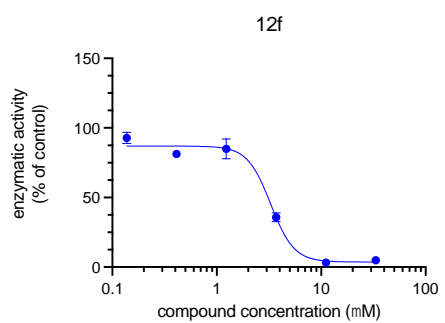

D

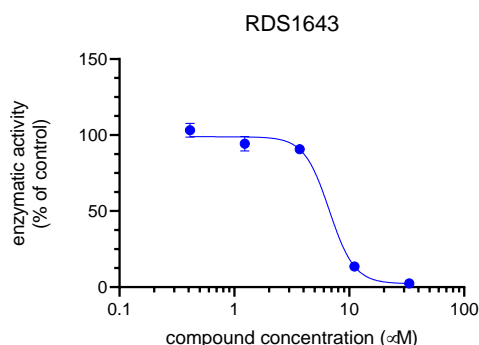

Figure S2. Inhibitory profile of compounds on HIV-1 RNase H activity. Panels A, B and C show the inhibitory profile of tested compounds, results represent the mean percentage  $\pm$  sd of enzymatic activity calculated with respect to the control in presence of indicated concentration of compound. Experiments were performed in triplicate with at least three replicates per concentration. D panel shows the inhibitory profile of RDS1643 used as positive control

#### 4. Magnesium Complexation

Complexation assays with  $\text{Mg}^{2+}$  were carried out on compounds **12b**. The effects of the  $\text{Mg}^{2+}$  were evaluated by a spectrophotometric method, using the UV Spectrophotometer Lambda 1050+ and a Hellma quartz cuvette with a 1 cm optical path.  $\text{MgCl}_2 \cdot 6\text{H}_2\text{O}$  was purchased from Aladdin Company. In the experimental study of the binding of compound **12b** with  $\text{Mg}^{2+}$ , we prepared solvent with a volume ratio of EtOH:dioxane:water = 1:1:1. We prepared 1000ml of this solvent and then weighed 25.75 mg of compound **12b** and dissolved it in the solvent. We take 500 mL of the solution and add magnesium chloride to achieve  $\text{Mg}^{2+}$  concentration of  $10^{-3}$  M. Each cuvette contained 3ml solution, and the UV-vis spectrum was recorded between 150 and 600 nm.

## 5. $^1\text{H}$ -NMR, $^{13}\text{C}$ -NMR spectra and HRMS of compounds

*Methyl 7-methyl-3-oxo-5-phenyl-2,3-dihydro-5H-thiazolo[3,2-*a*]pyrimidine-6-carboxylate(9a).*

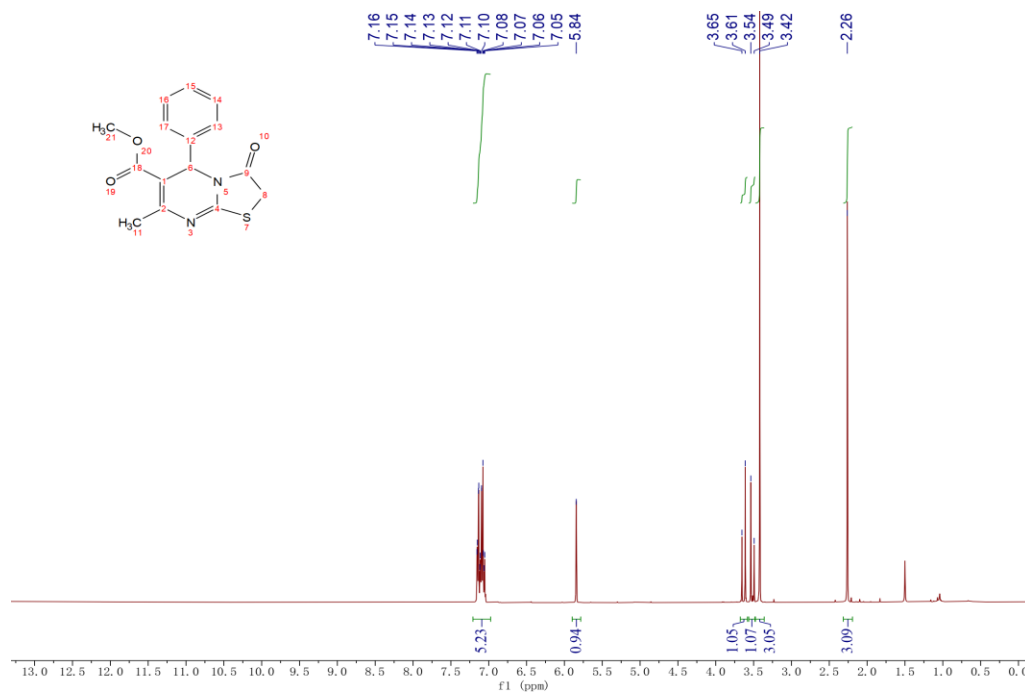

*Methyl 5-(4-methoxyphenyl)-7-methyl-3-oxo-2,3-dihydro-5H-thiazolo[3,2-*a*]pyrimidine-6-carboxylate(9c).*

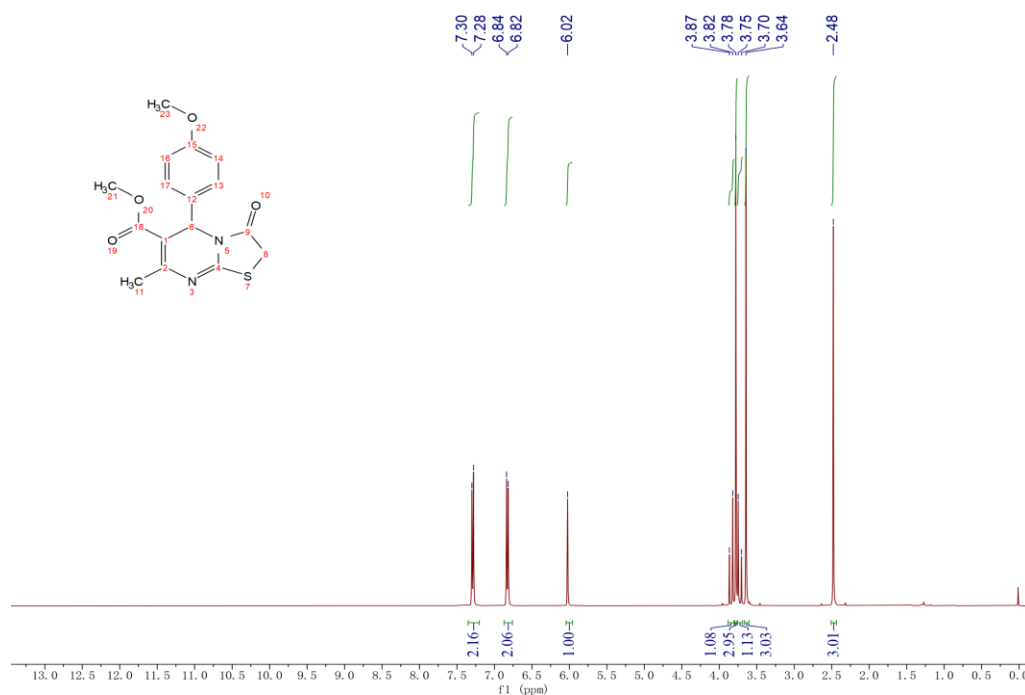

Methyl 7-methyl-3-oxo-5-(2,3,4-trimethoxyphenyl)-2,3-dihydro-5H-thiazolo[3,2-a]pyrimidine-6-carboxylate (**9b**).

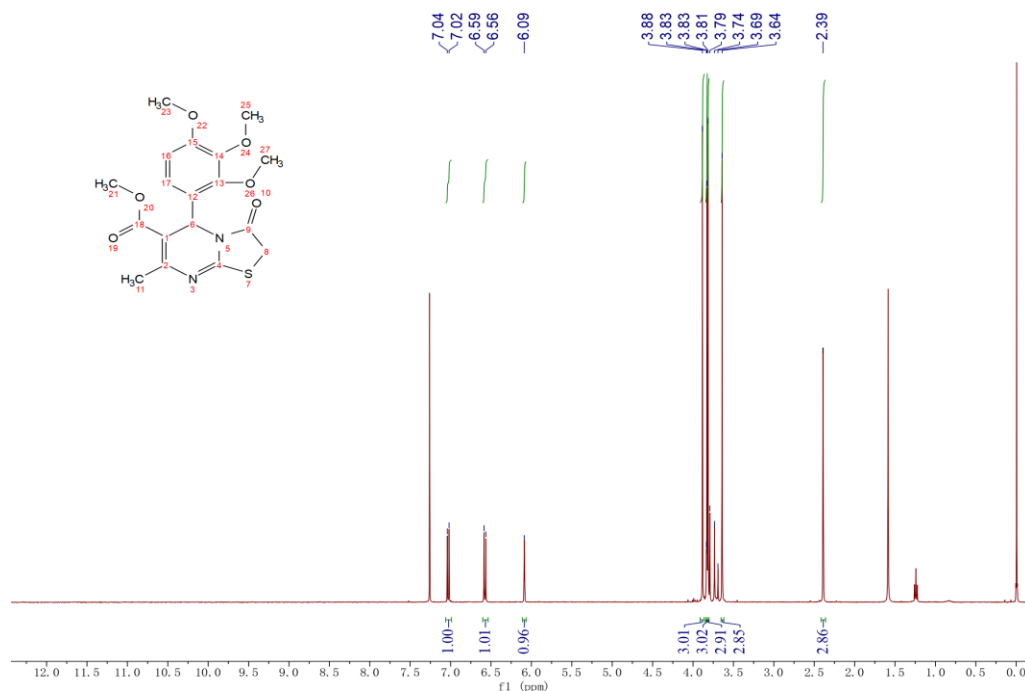

Methyl 2-(2-(2-hydroxyphenyl)hydrazineylidene)-7-methyl-3-oxo-5-phenyl-2,3-dihydro-5H-thiazolo[3,2-a]pyrimidine-6-carboxylate (**10a**).

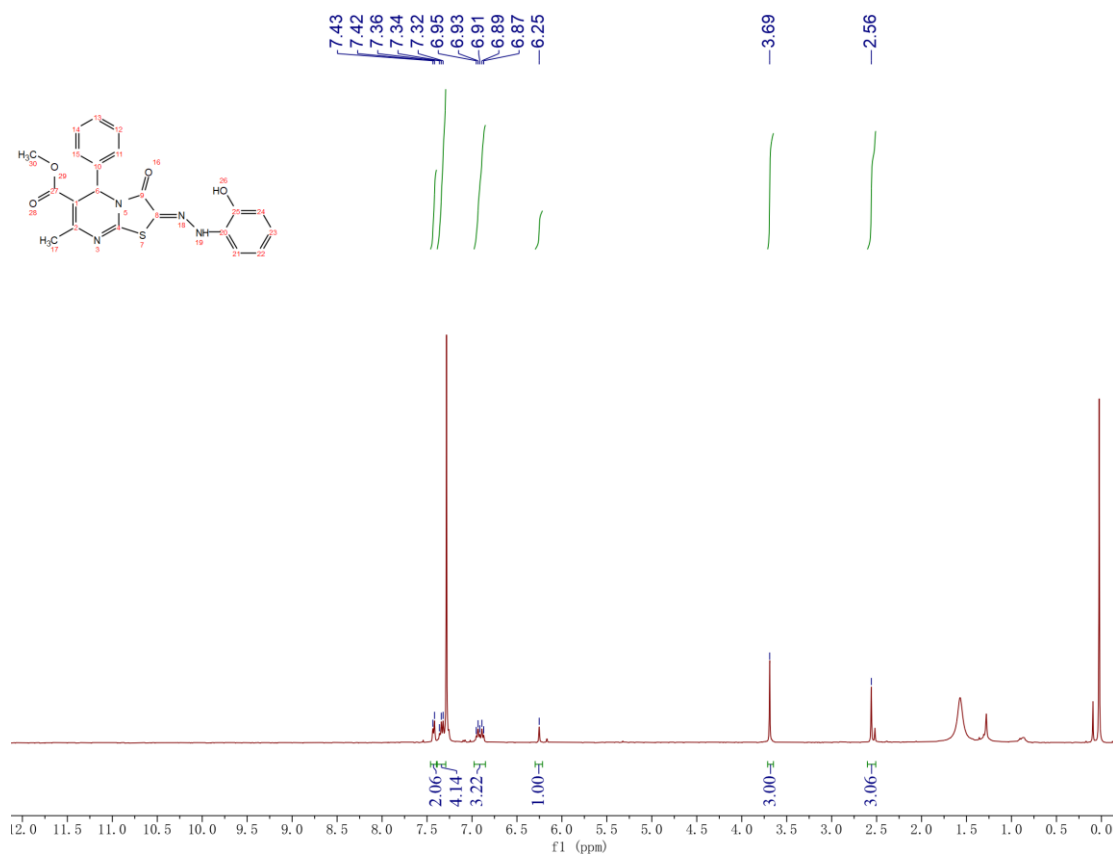

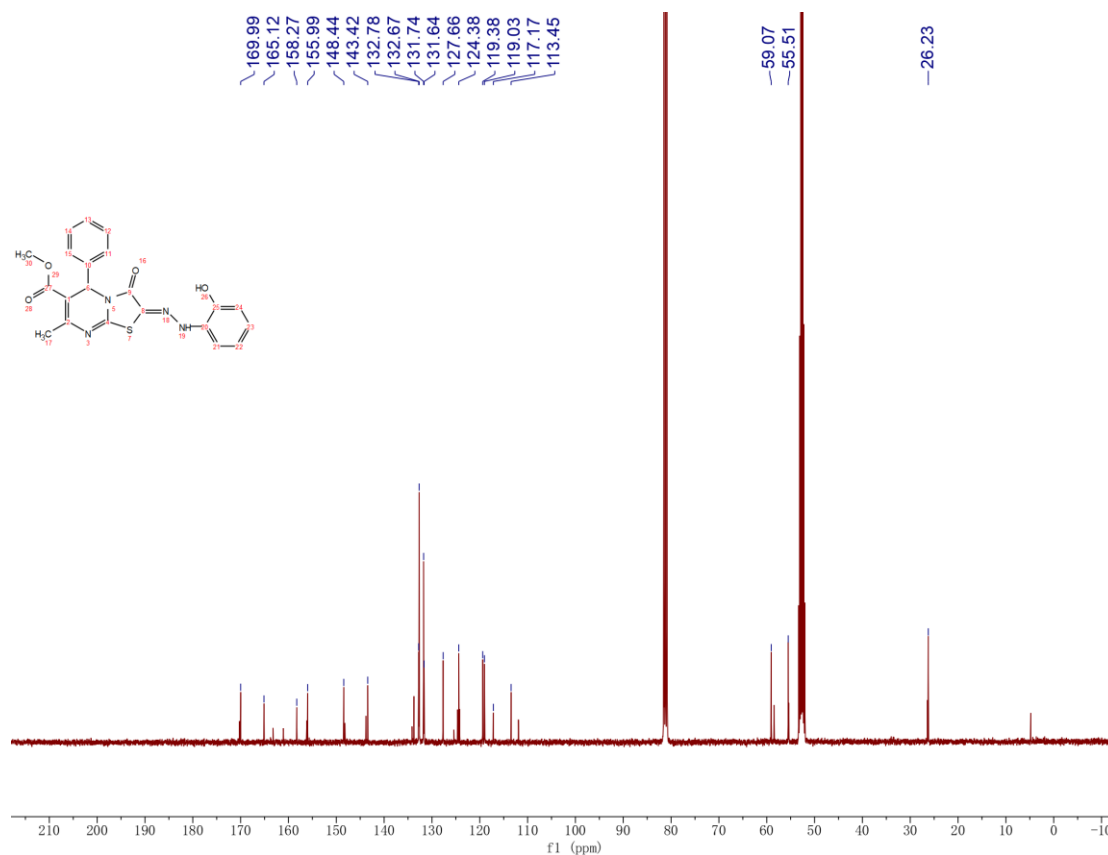

(2-(6-(Methoxycarbonyl)-7-methyl-3-oxo-5-phenyl-5H-thiazolo[3, 2-a]pyrimidin-2(3H)-ylidene)hydrazineyl)-3-methylbenzoic acid (**10b**).

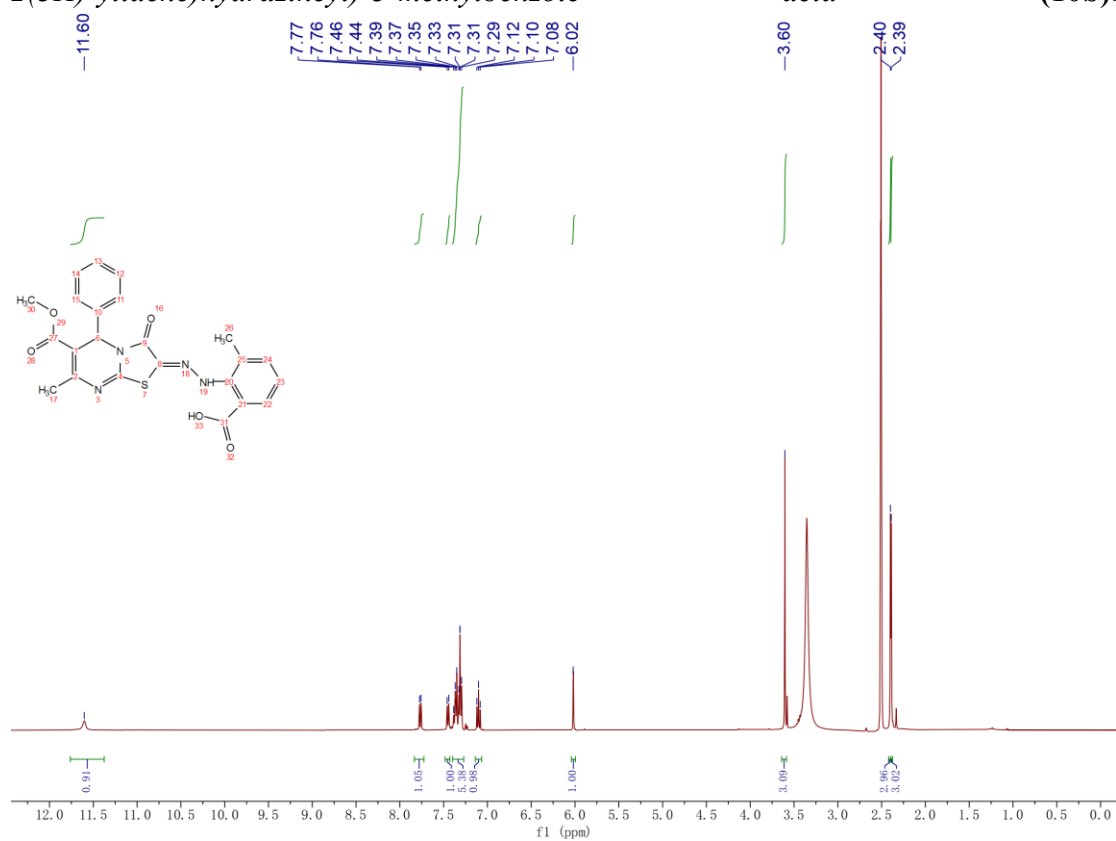

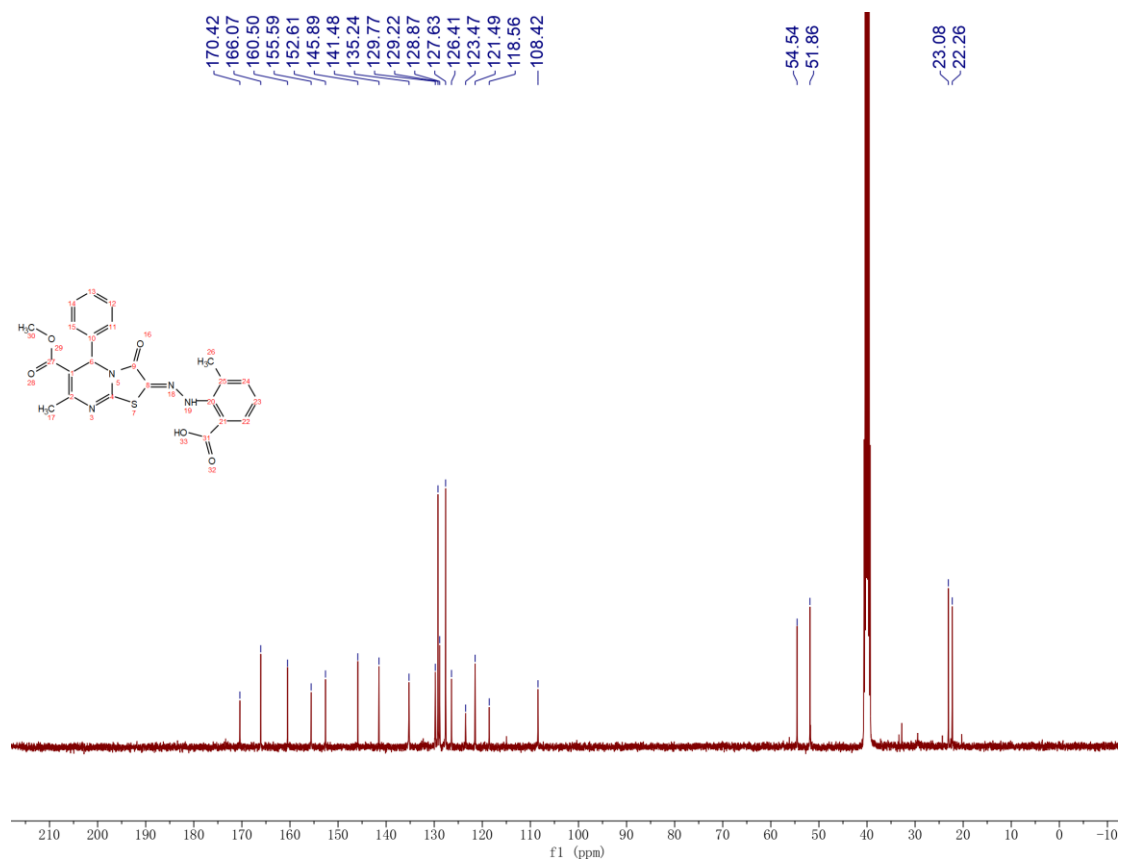

*Methyl 7-methyl-3-oxo-5-phenyl-2-(2-(3, 4, 5-trimethoxyphenyl)hydrazineylidene)-2, 3-dihydro-5H-thiazolo[3, 2-a]pyrimidine-6-carboxylate* **(10c).**

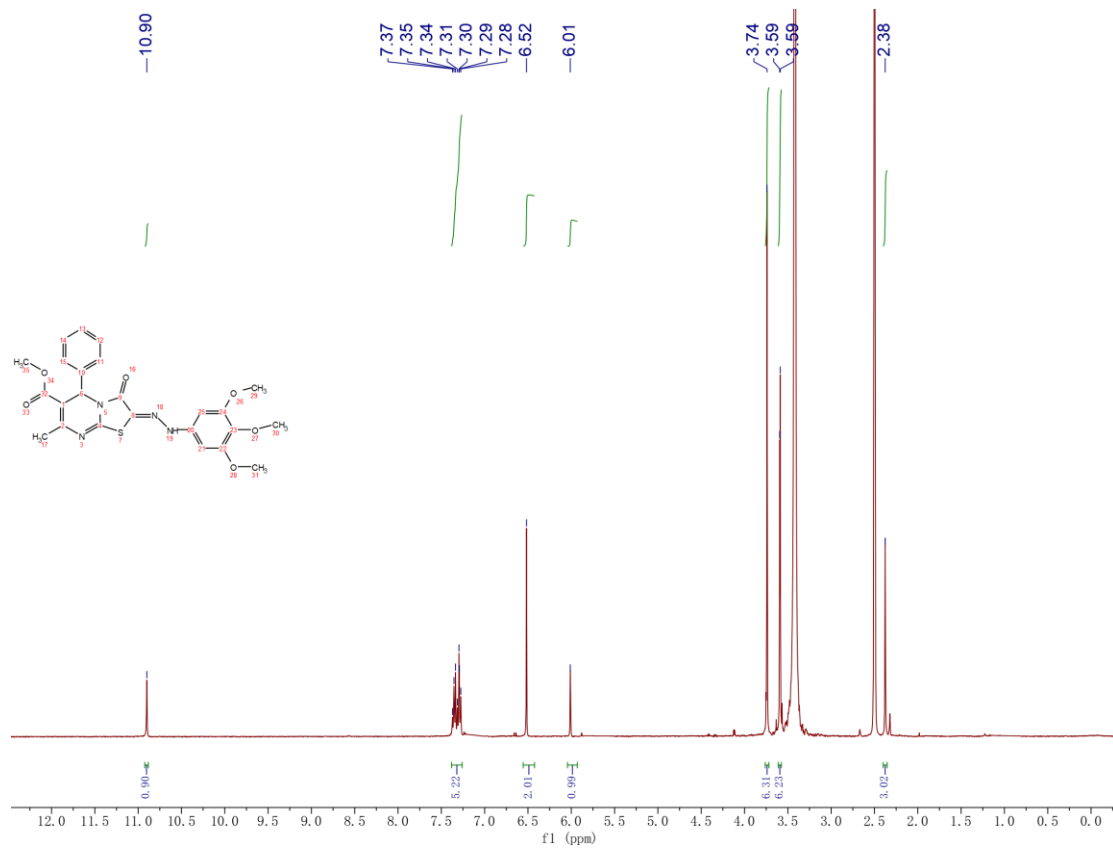

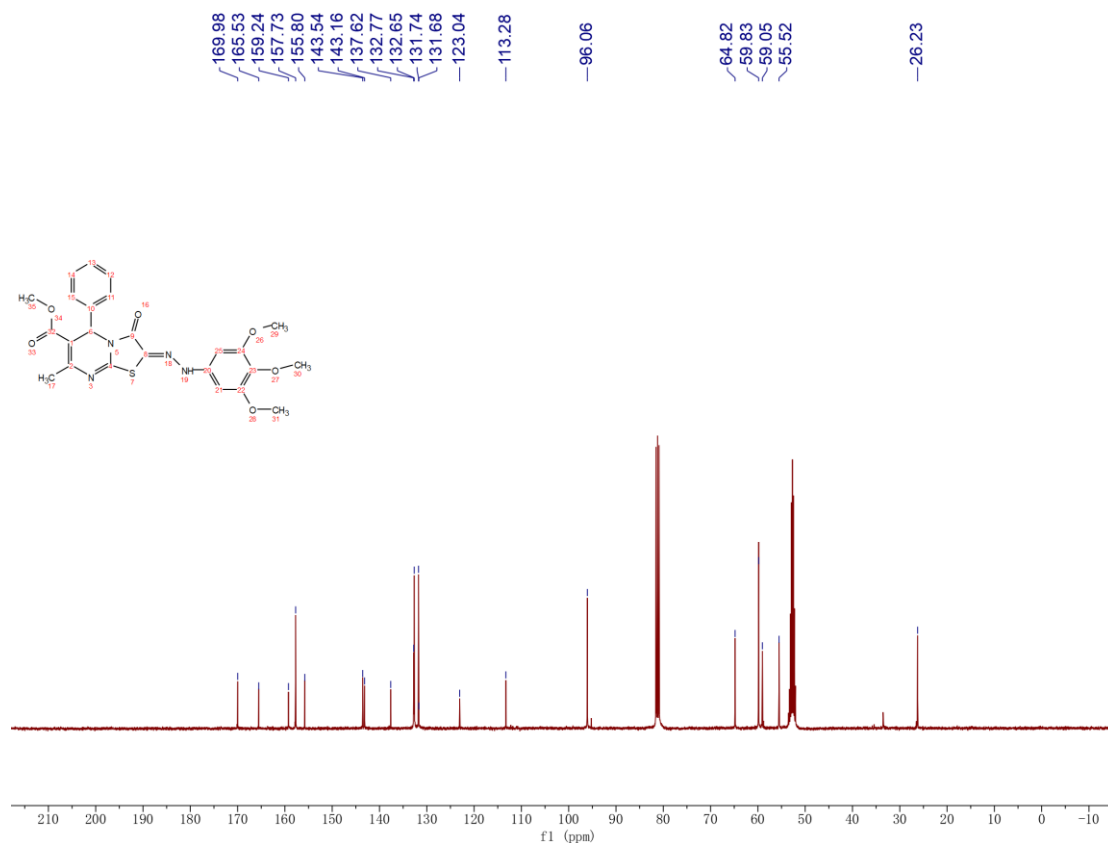

*Methyl 2-((2-(methoxycarbonyl)phenyl)diazenyl)-7-methyl-3-oxo-5-phenyl-2,3-dihydro-5H-thiazolo[3,2-a]pyrimidine-6-carboxylate (10d).*

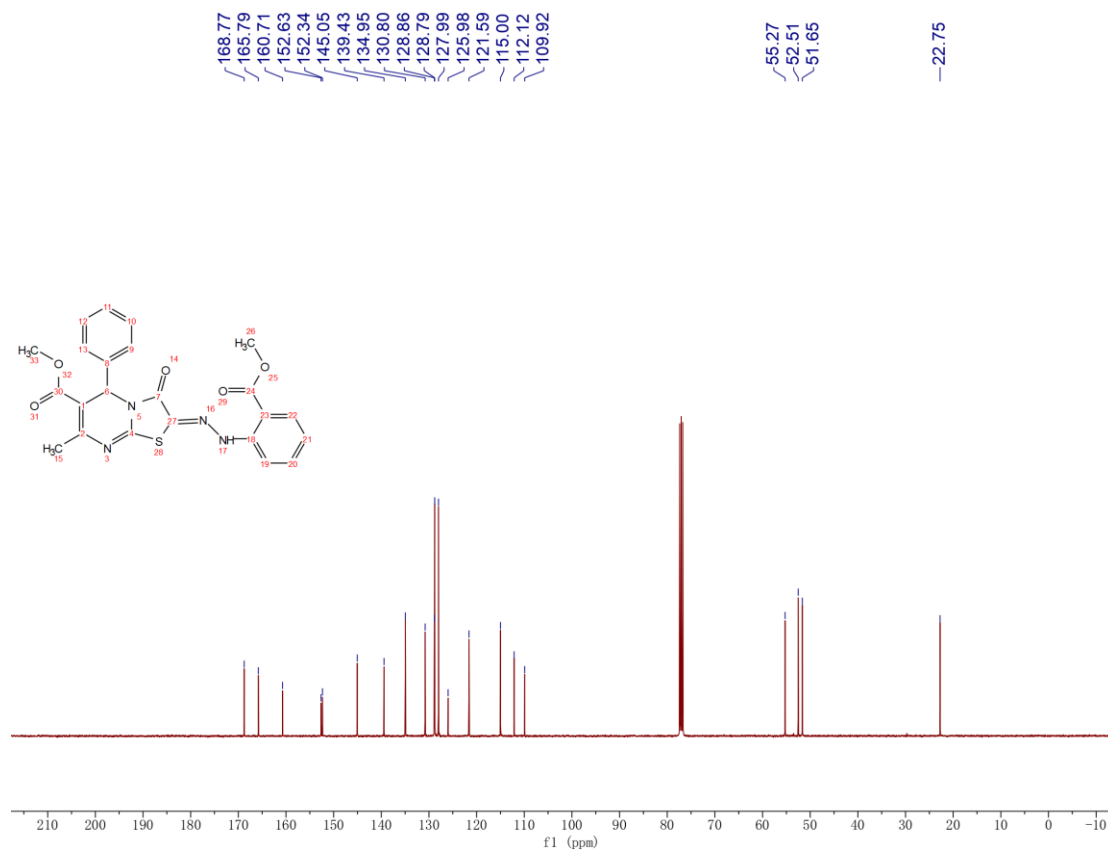

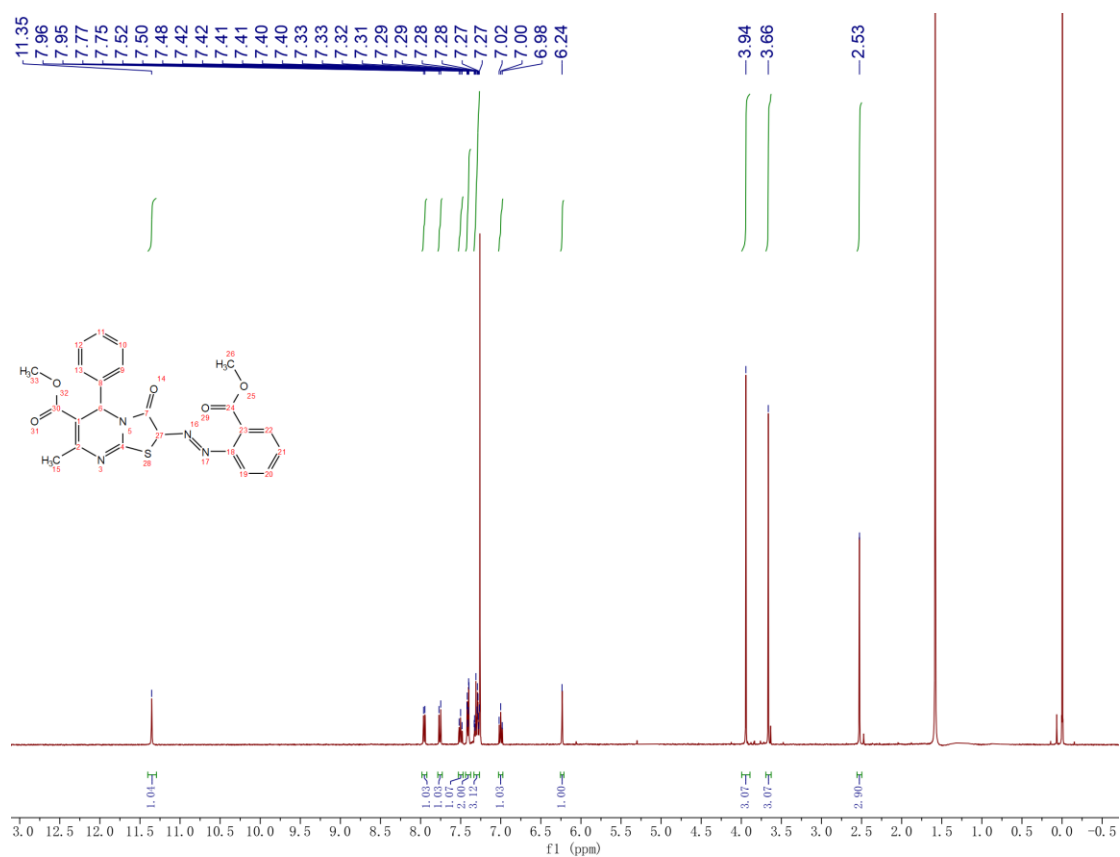

**5-Methoxy-2-(2-(6-(methoxycarbonyl)-7-methyl-3-oxo-5-phenyl-5H-thiazolo[3,2-a]pyrimidin-2(3H)-ylidene)hydrazineyl)benzenesulfonic acid (10e).**

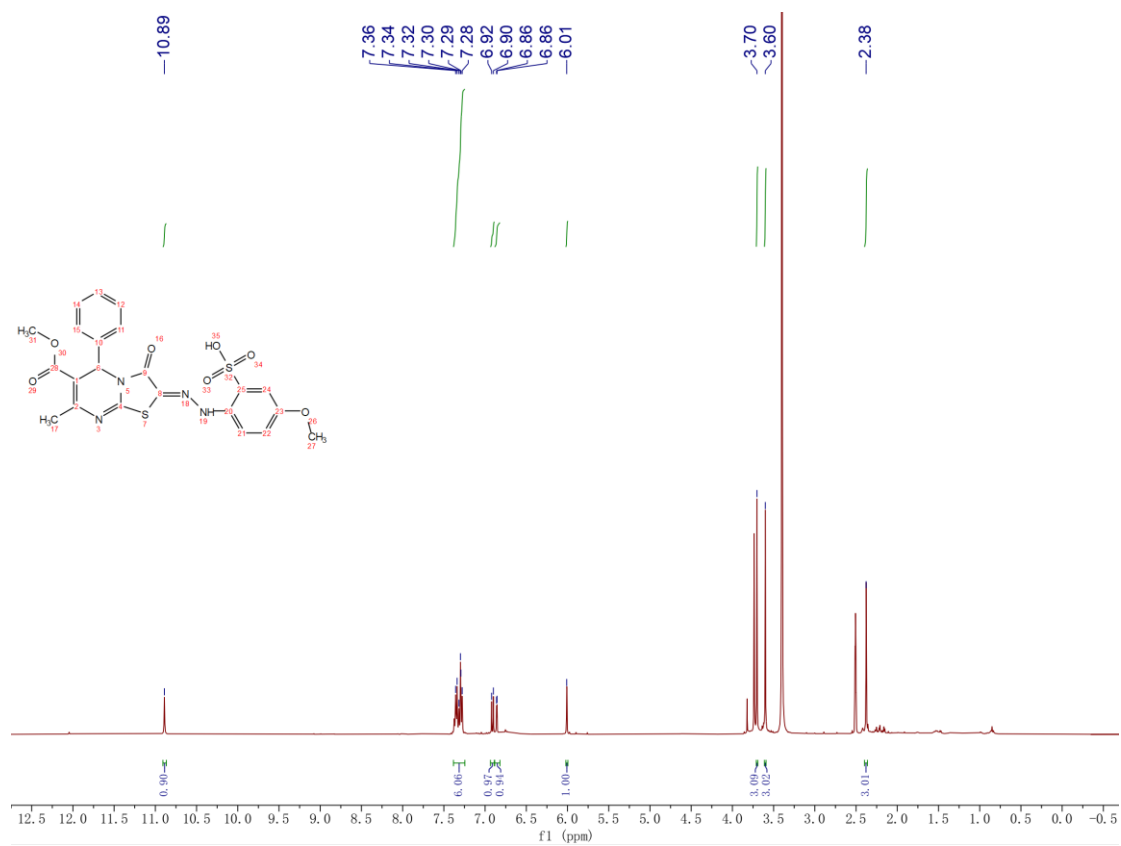

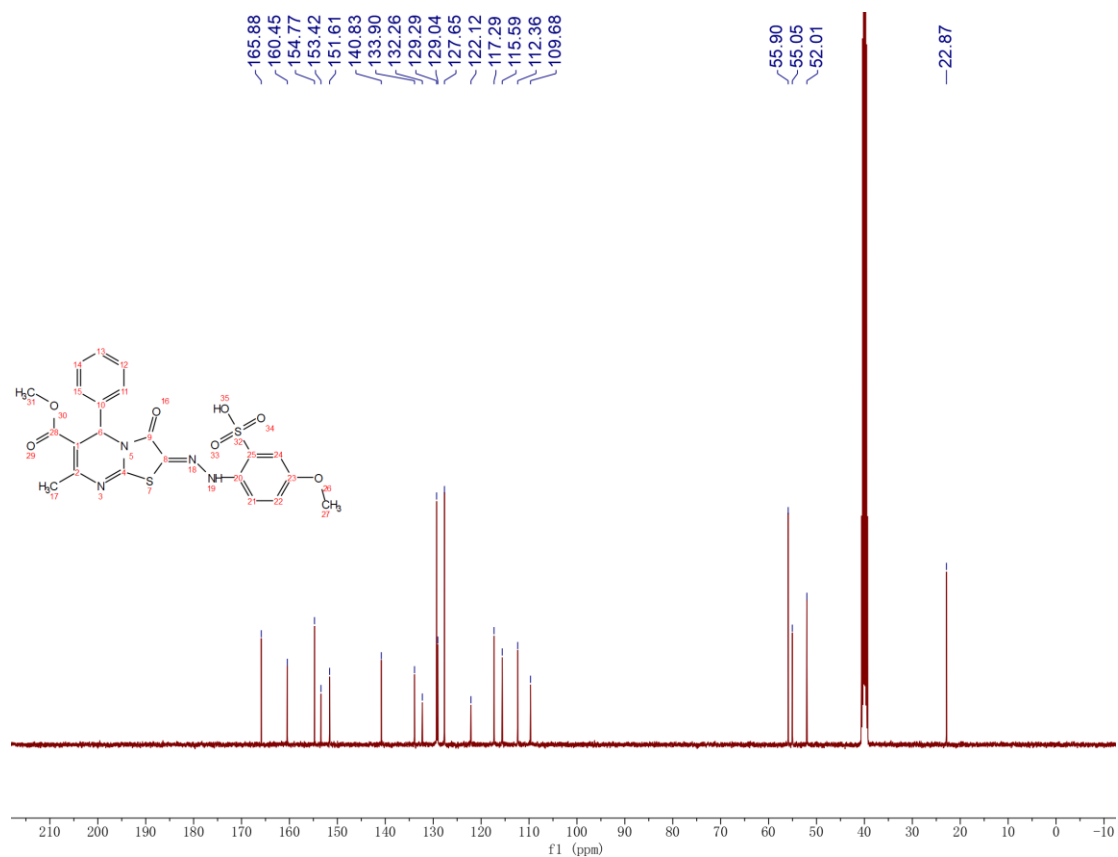

(6-(Methoxycarbonyl)-7-methyl-3-oxo-5-phenyl-5H-thiazolo[3, 2-a]pyrimidin-2(3H)-ylidene)hydrazineyl)naphthalene-1-sulfonic acid **(10f)**.

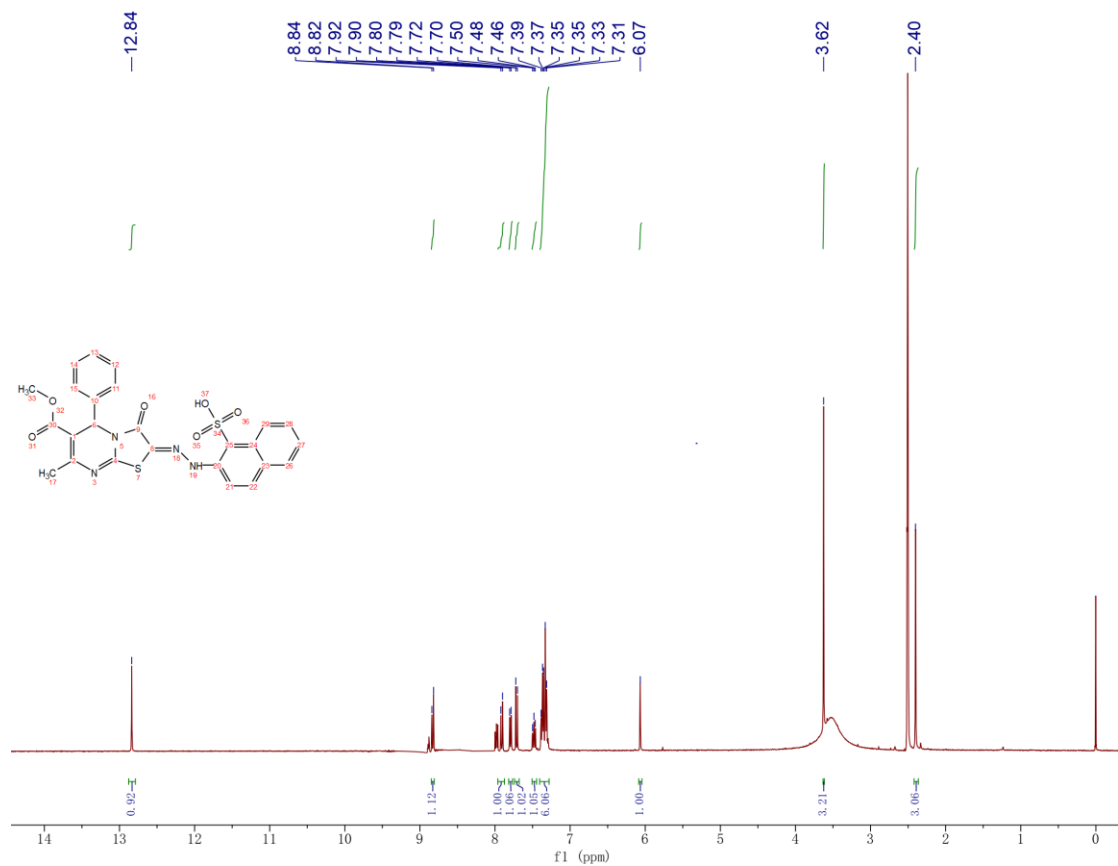

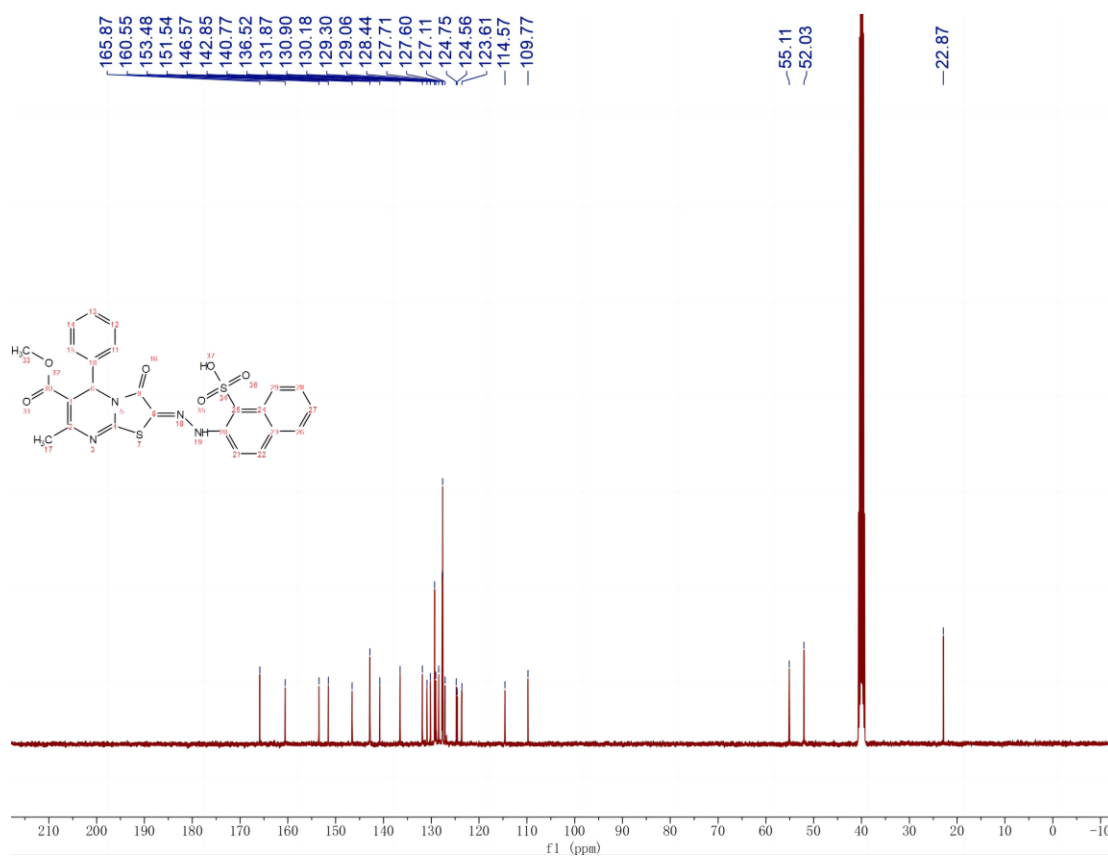

*Methyl 2-(2-(2-acetylphenyl)hydrazineylidene)-7-methyl-3-oxo-5-phenyl-2,3-dihydro-5H-thiazolo[3,2-a]pyrimidine-6-carboxylate (10g).*

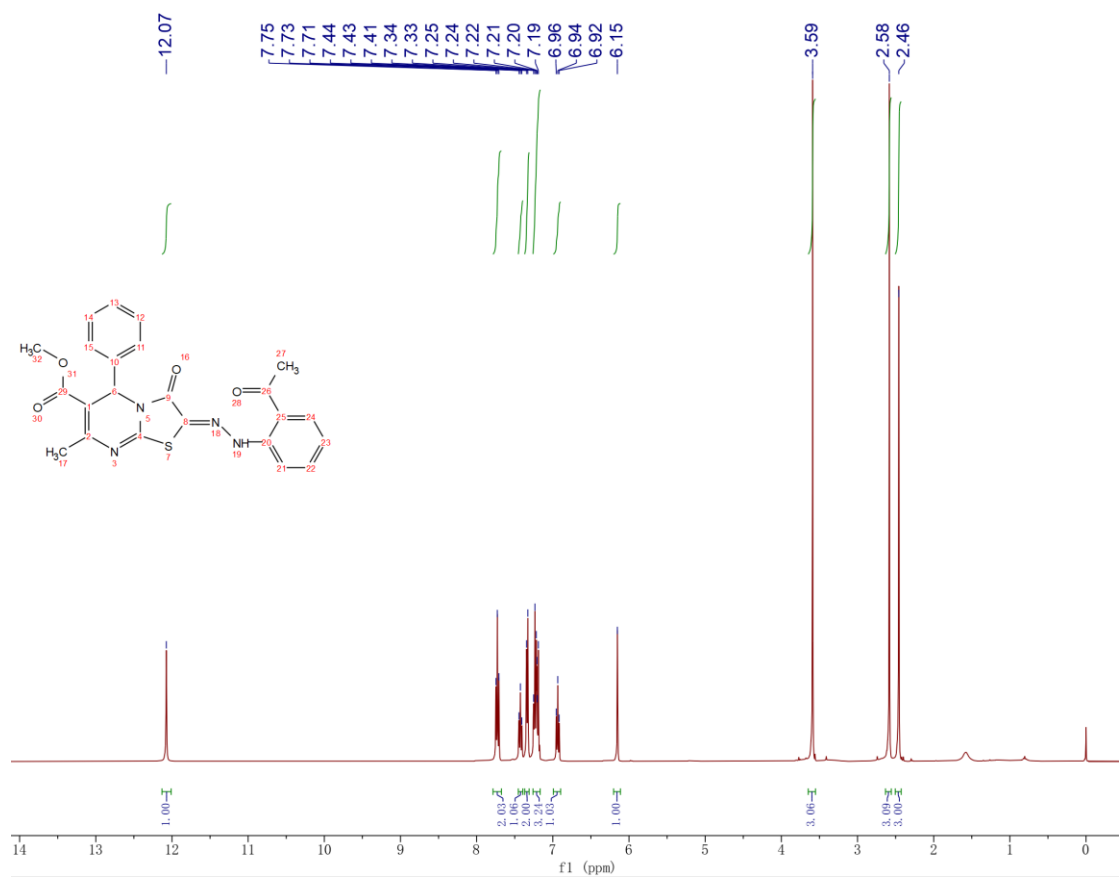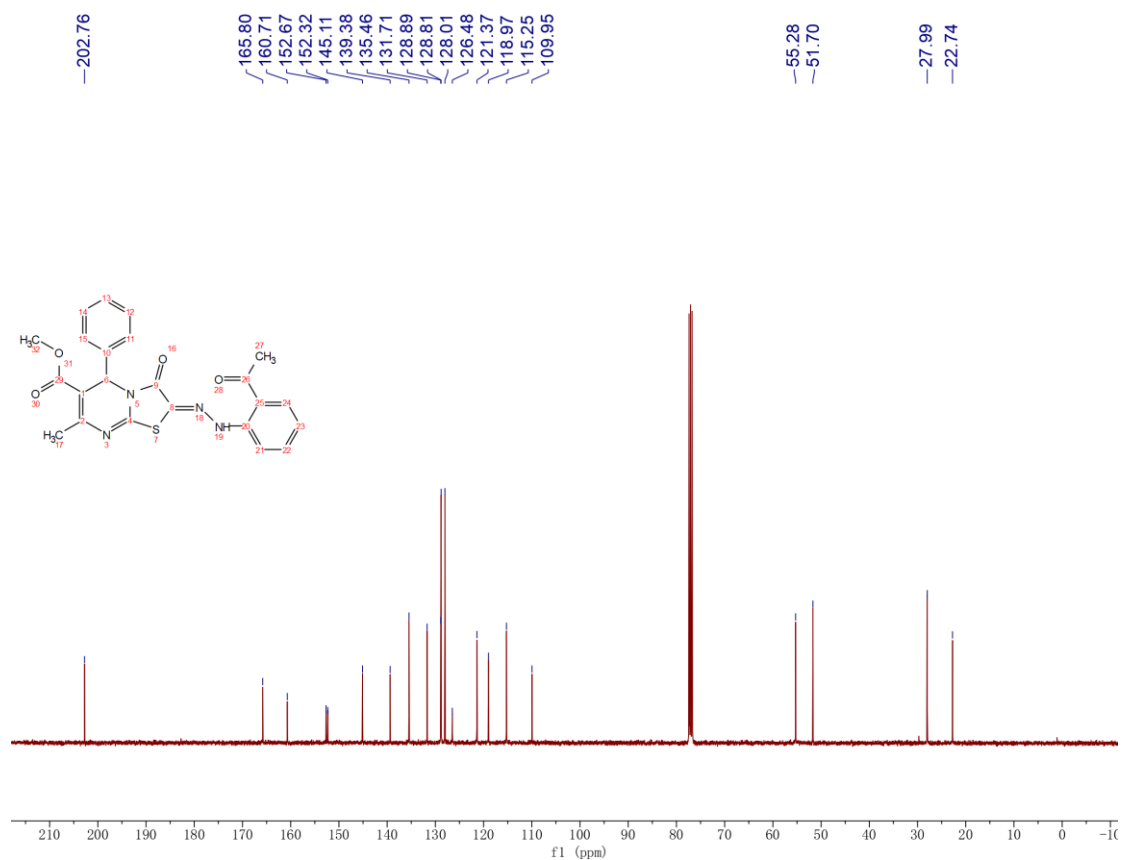

*Methyl 2-(2-(3, 4-dimethoxyphenyl)hydrazineylidene)-7-methyl-3-oxo-5-phenyl-2, 3-*

*dihydro-5H-thiazolo[3,*

*2-a]pyrimidine-6-carboxylate*

**(10h).**

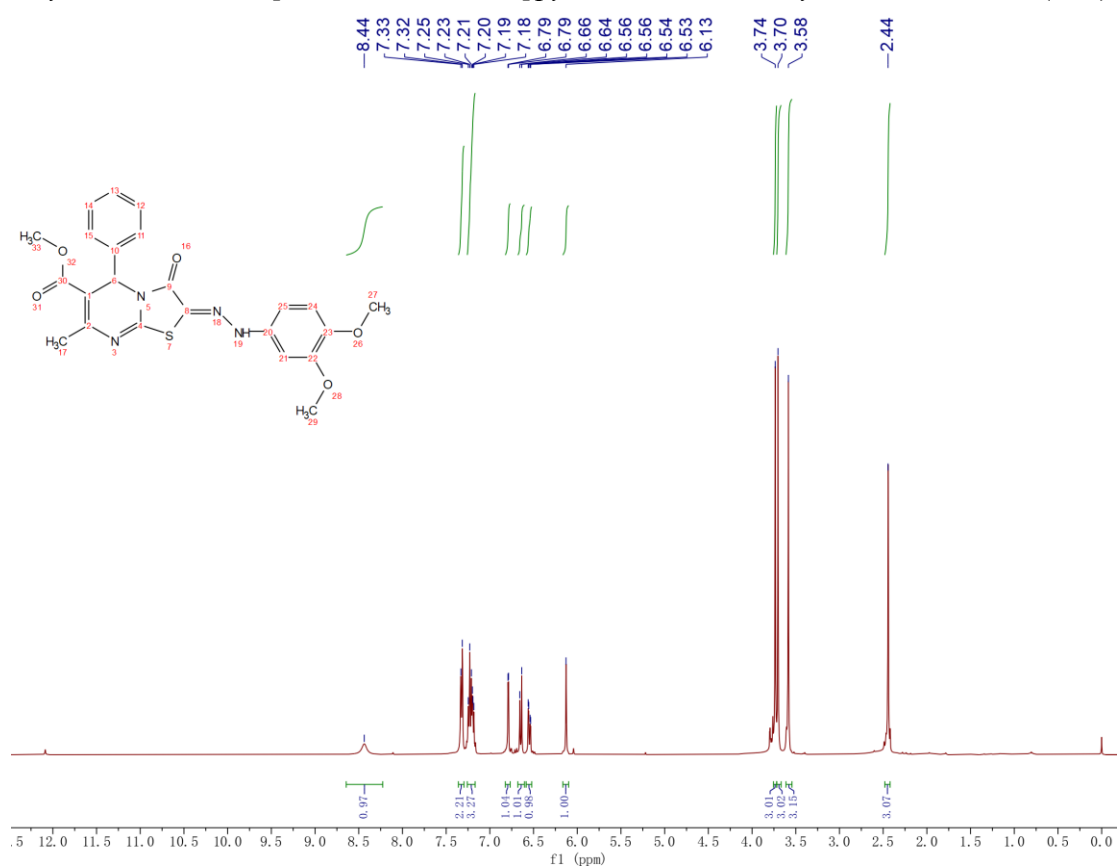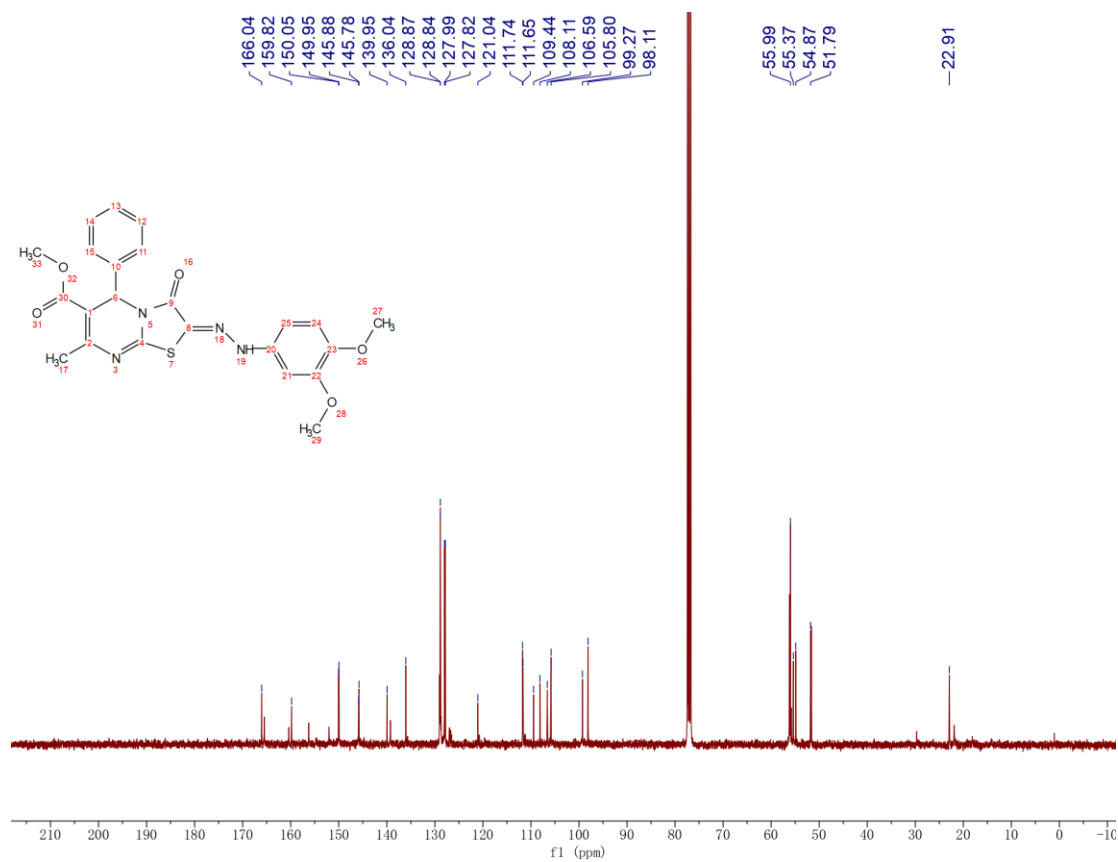

*Methyl 2-(2-(2-methoxyphenyl)hydrazineylidene)-7-methyl-3-oxo-5-phenyl-2, 3-dihydro-5H-thiazolo[3, 2-a]pyrimidine-6-carboxylate* **(10i)**.

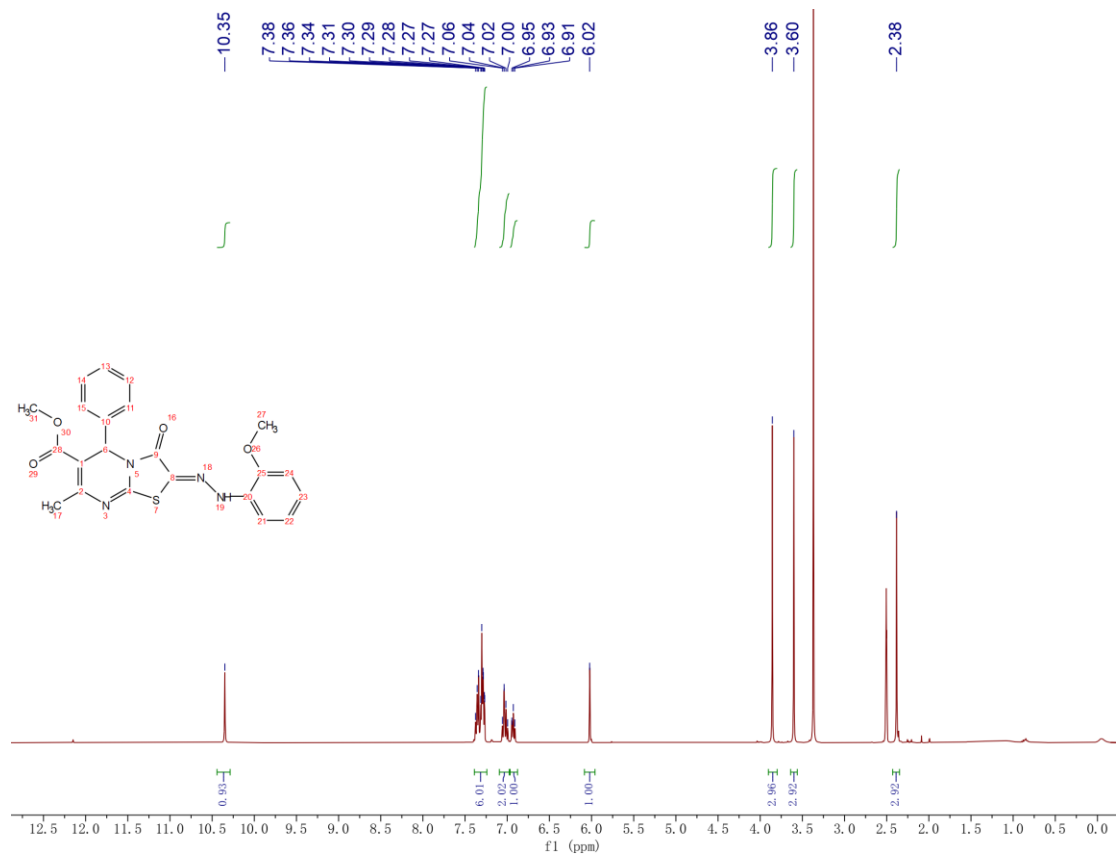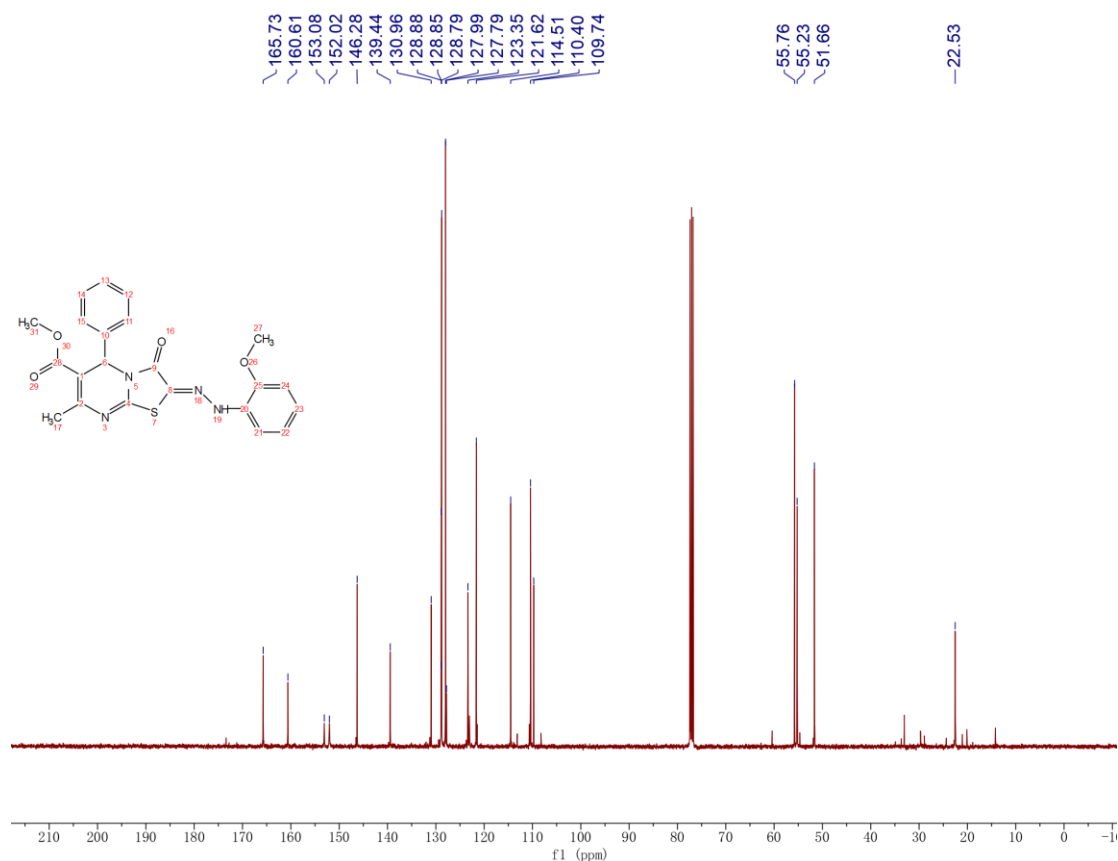

Methyl 7-methyl-3-oxo-5-phenyl-2-(2-phenylhydrazineylidene)-2,3-dihydro-5H-thiazolo[3,2-a]pyrimidine-6-carboxylate (10j).

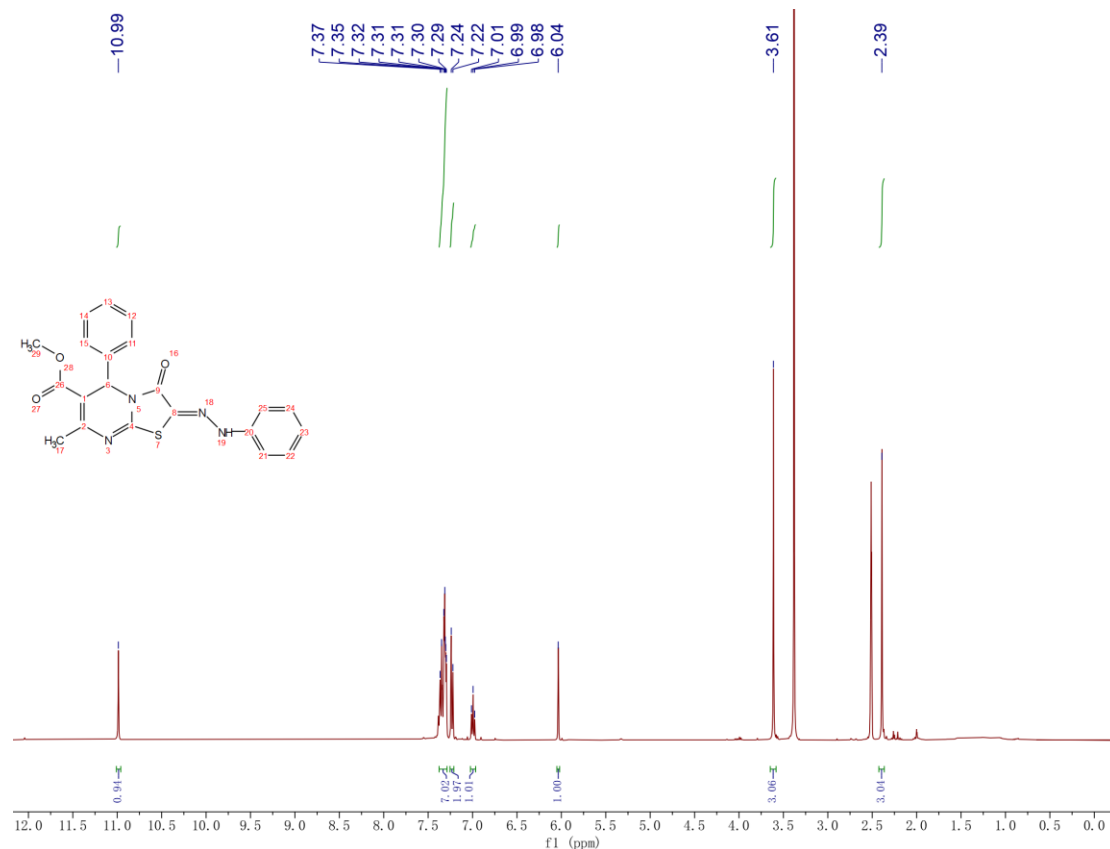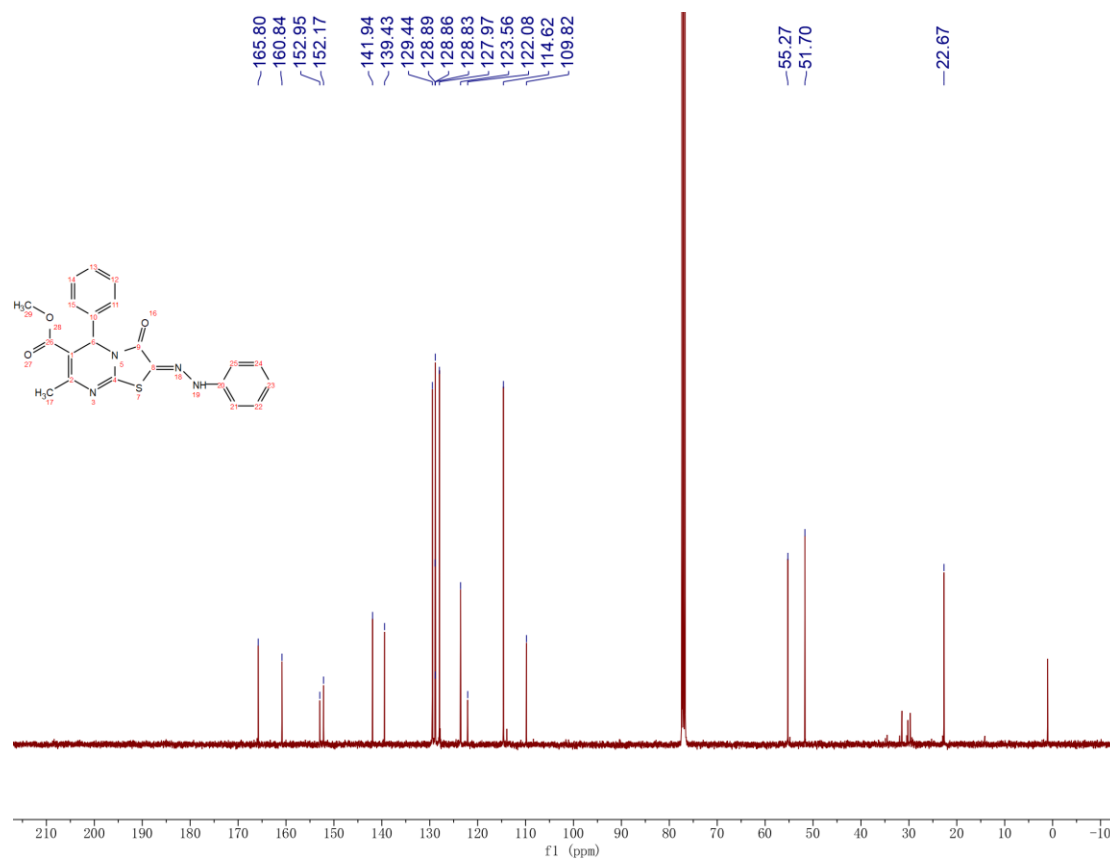

(2-(6-(Methoxycarbonyl)-7-methyl-3-oxo-5-phenyl-5H-thiazolo[3,2(3H)-ylidene)hydrazineyl)benzenesulfonic acid (10k).

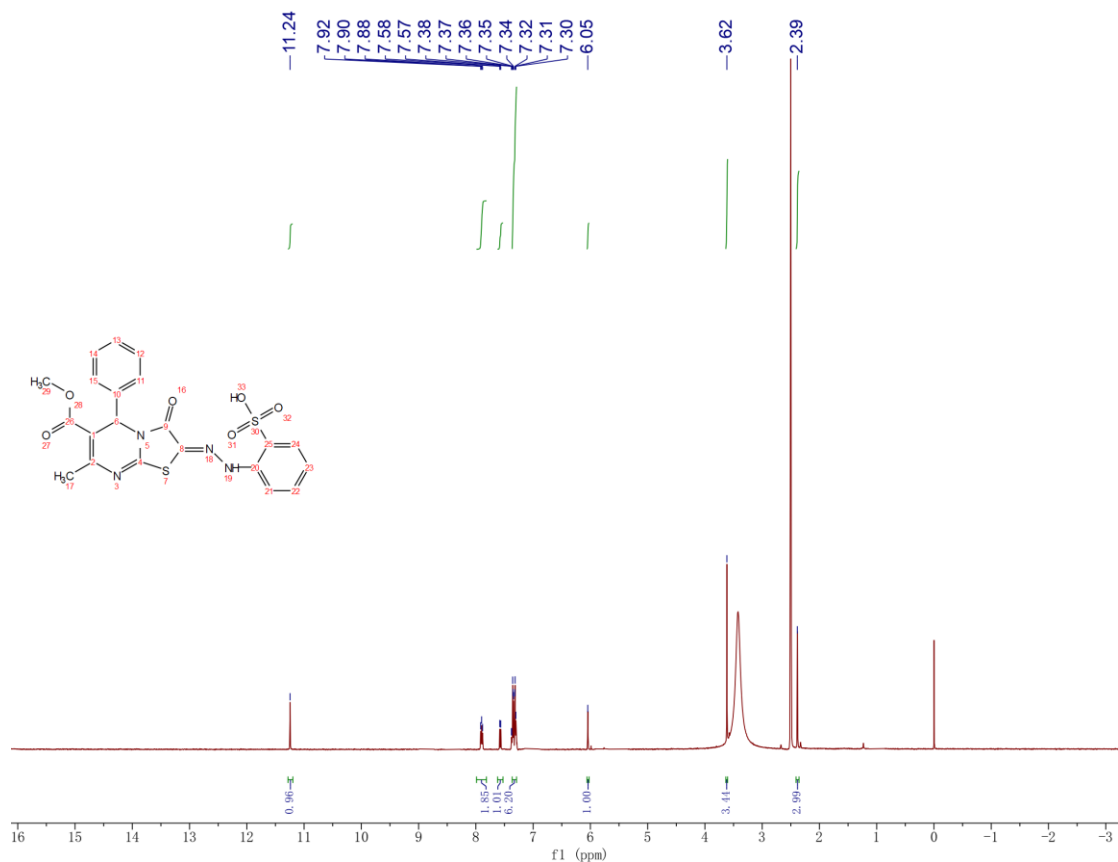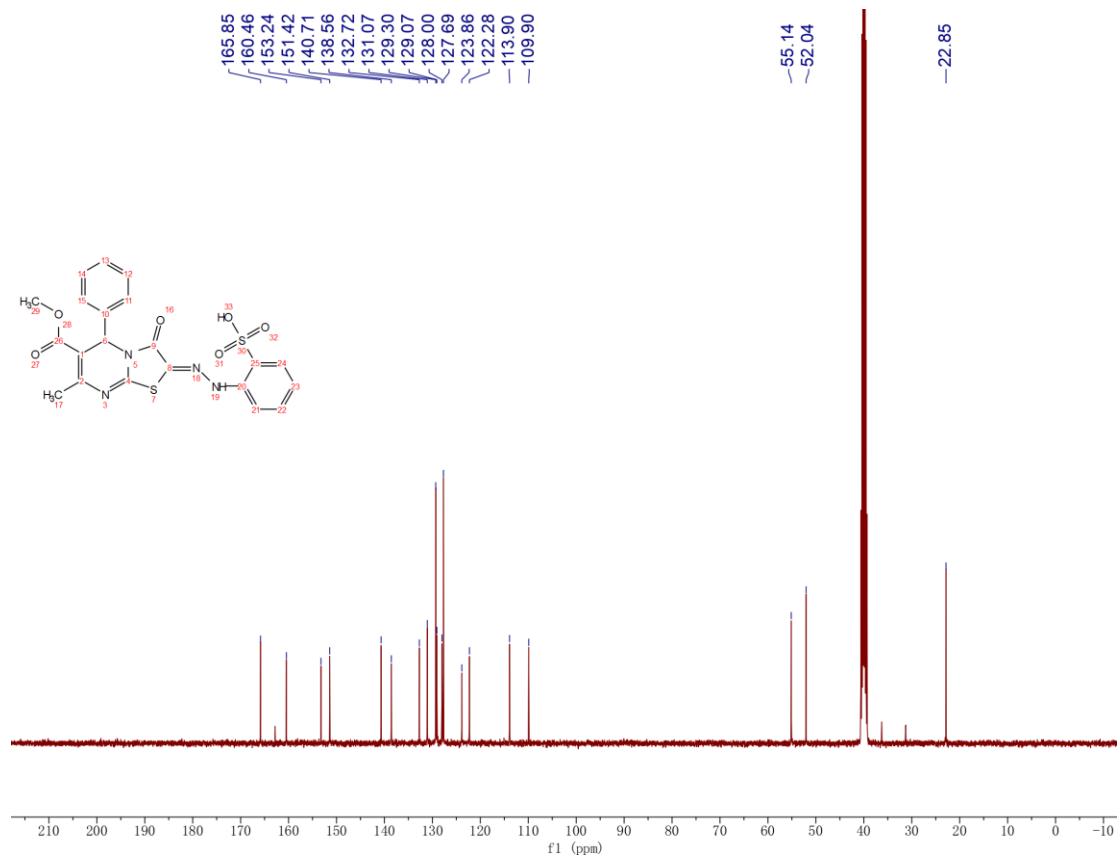

Methyl 7-methyl-2-(2-(3-nitrophenyl)hydrazineylidene)-3-oxo-5-phenyl-2,3-dihydro-5H-thiazolo[3,2-a]pyrimidine-6-carboxylate (10l).

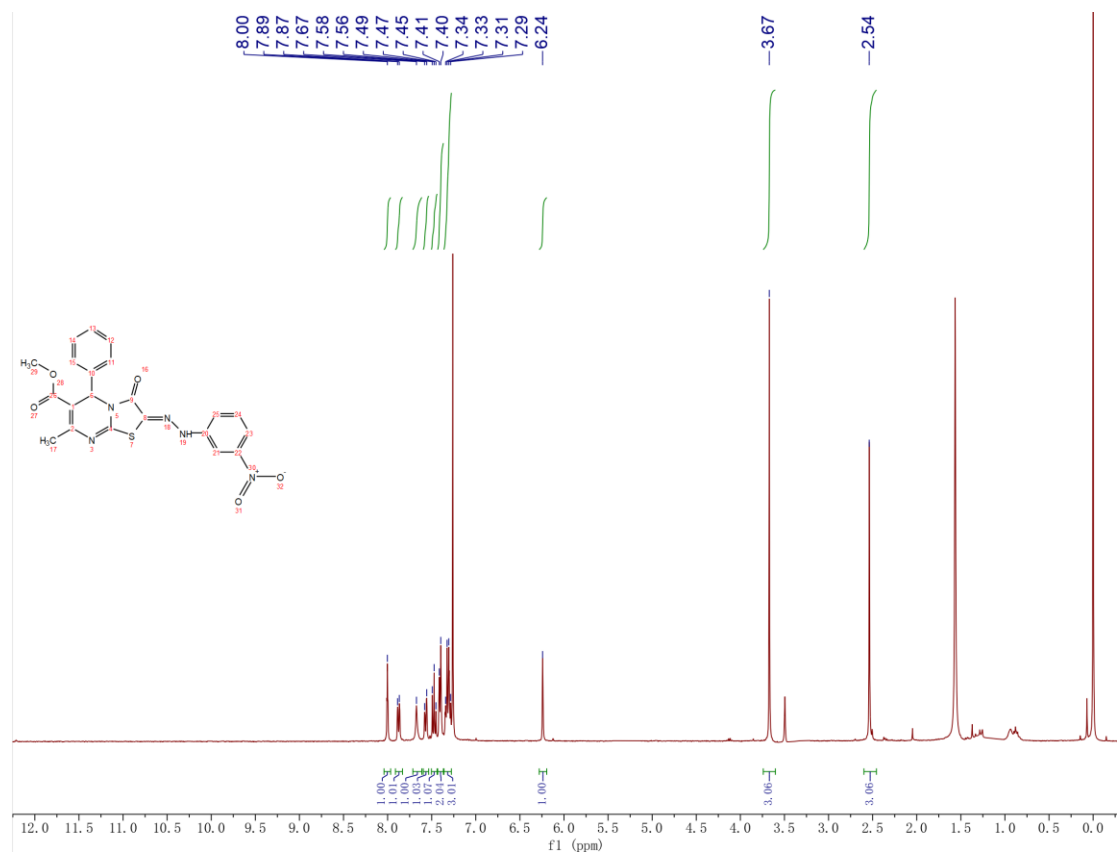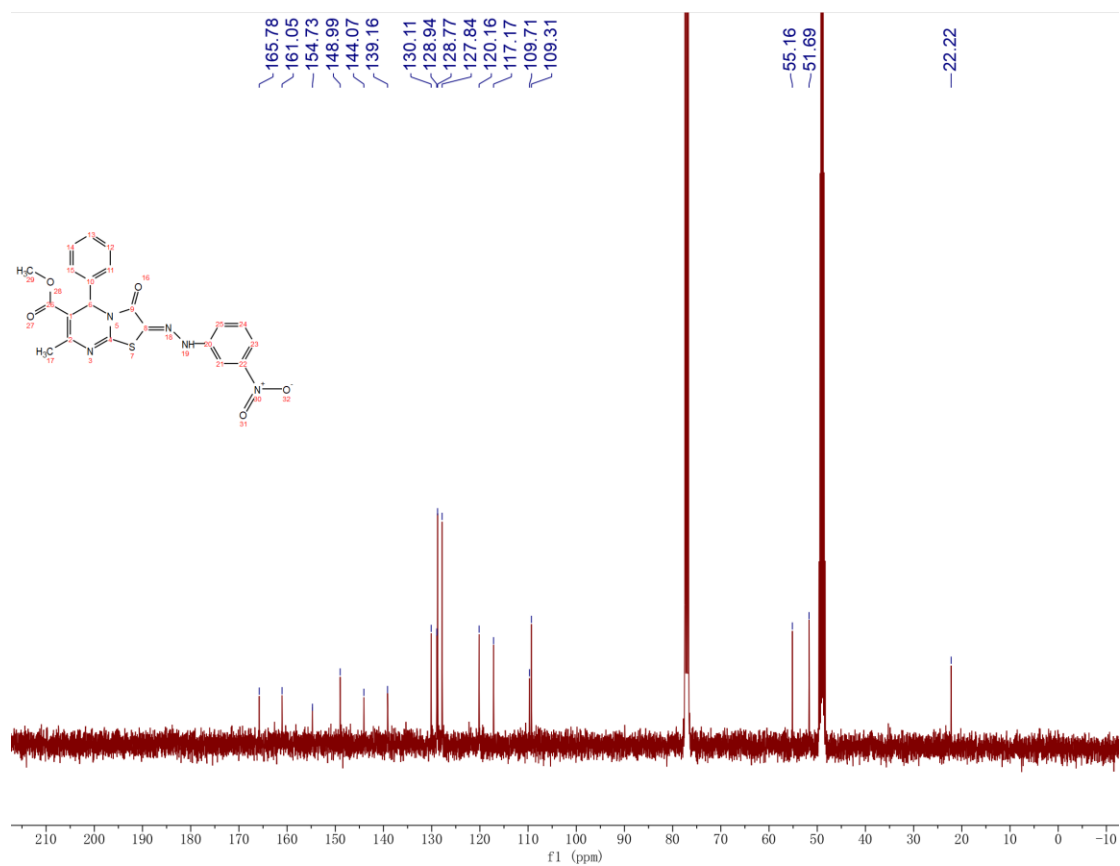

*Methyl 2-(2-(3-acetylphenyl)hydrazineylidene)-7-methyl-3-oxo-5-phenyl-2, 3-dihydro-5H-thiazolo[3, 2-a]pyrimidine-6-carboxylate* **(10m).**

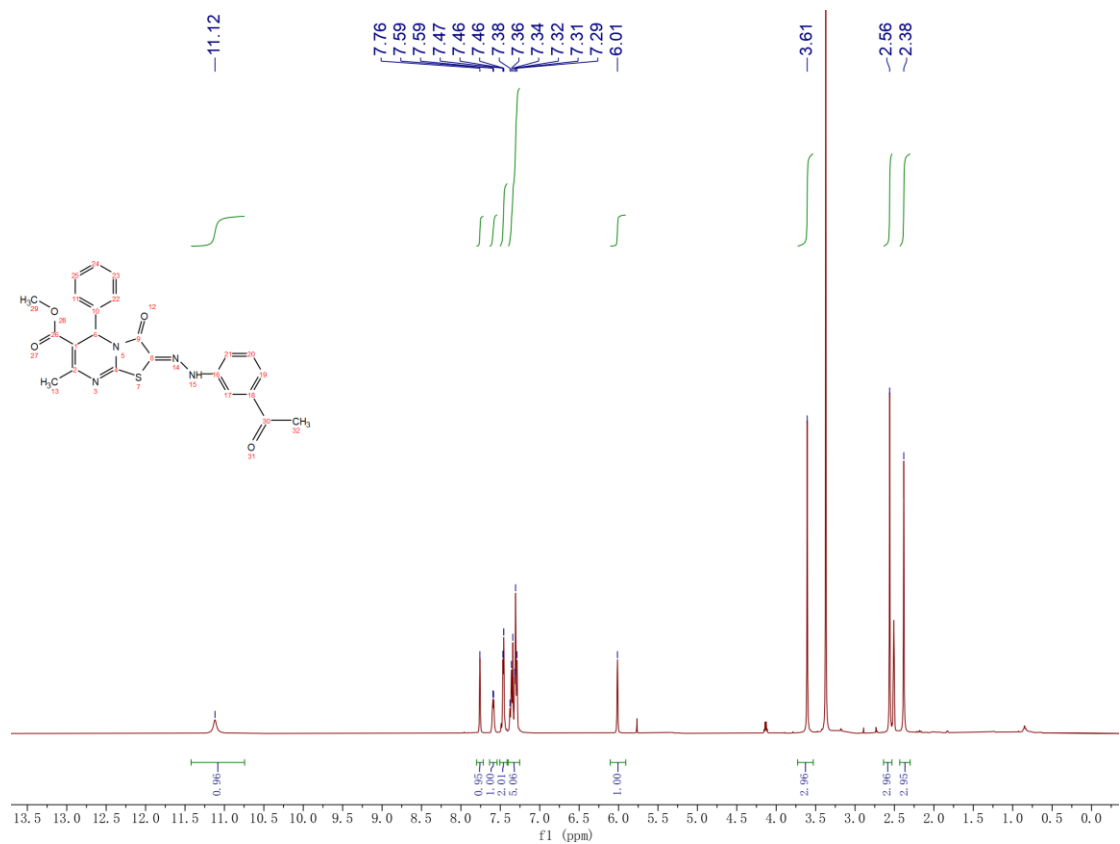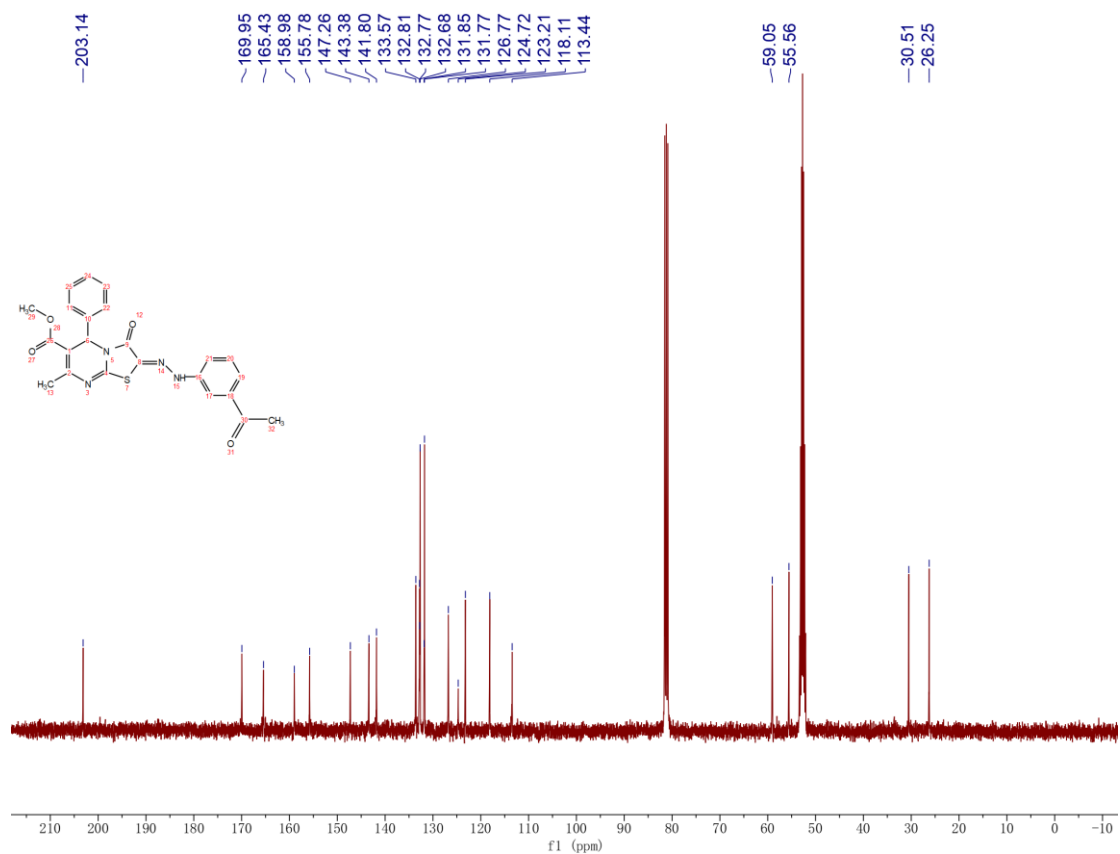

*Methyl 2-(2-(3-(methoxycarbonyl)phenyl)hydrazineylidene)-7-methyl-3-oxo-5-phenyl-2,3-dihydro-5H-thiazolo[3,2-a]pyrimidine-6-carboxylate* **(10n)**.

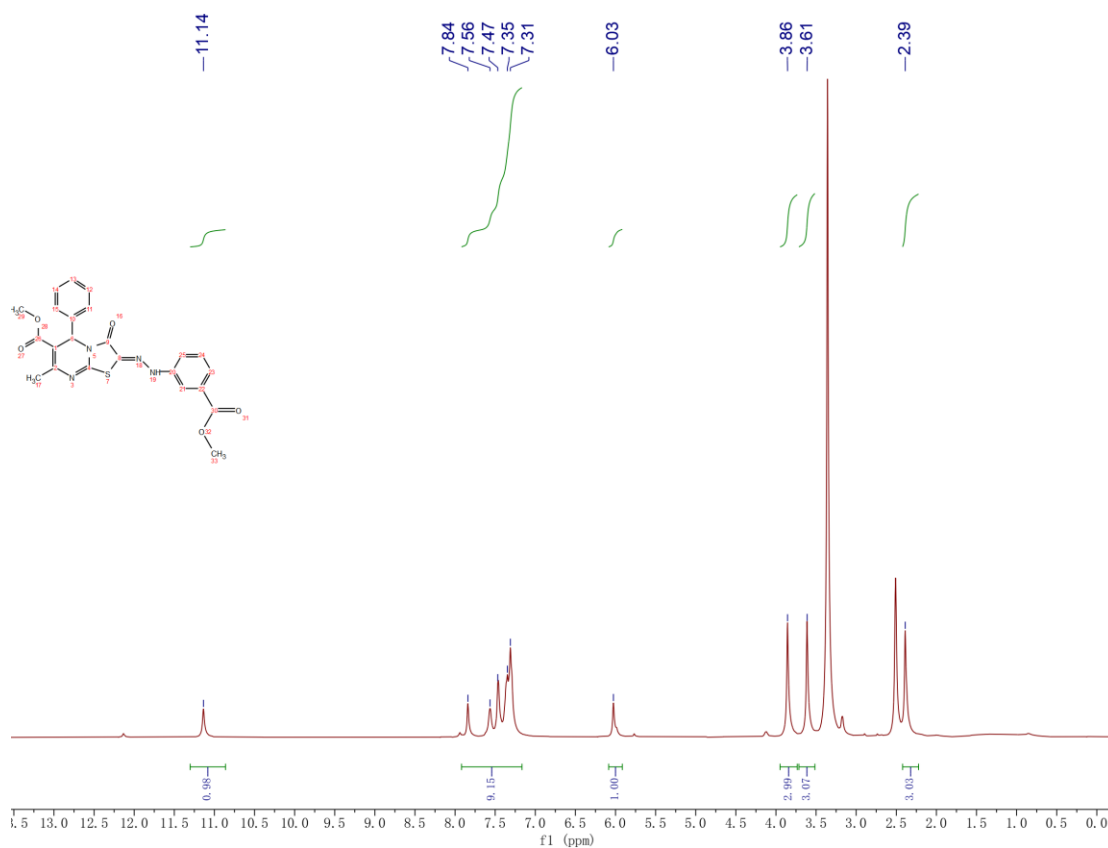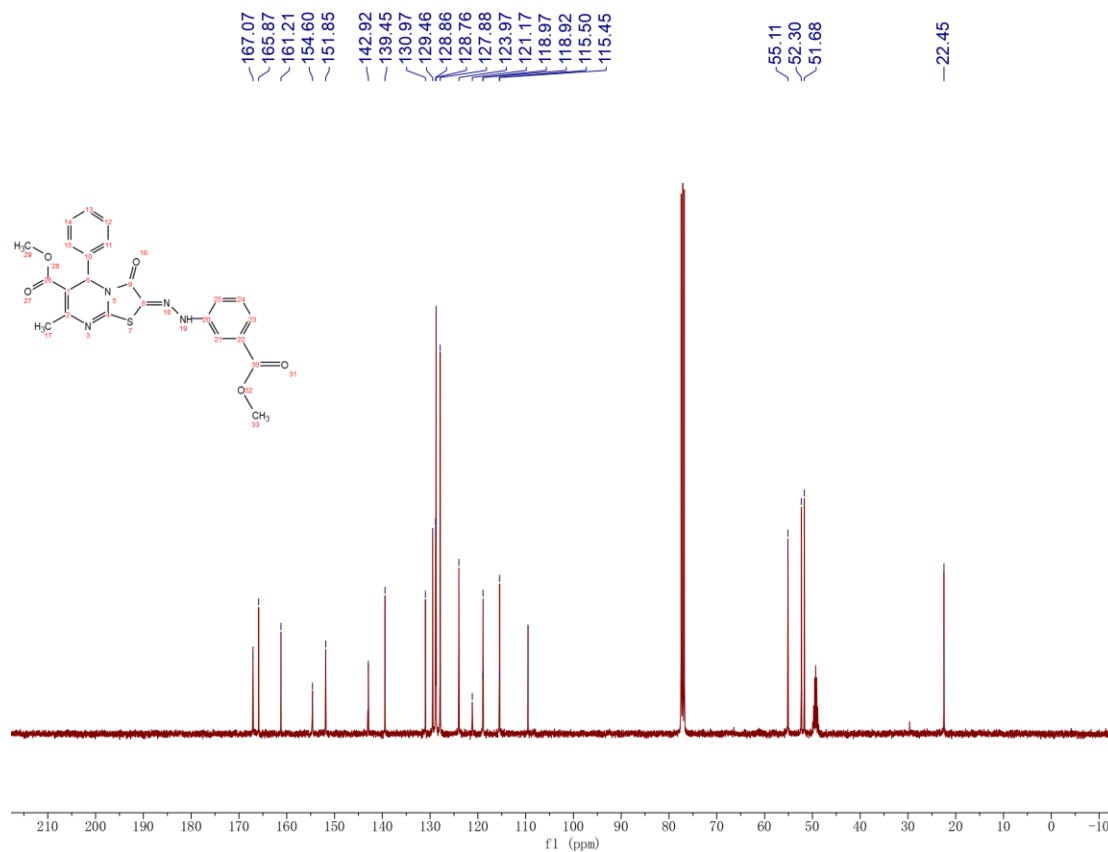

*Methyl 2-(2-(2-acetylphenyl)hydrazineylidene)-5-(4-methoxyphenyl)-7-methyl-3-oxo-2,3-dihydro-5H-thiazolo[3,2-a]pyrimidine-6-carboxylate* **(12a)**.

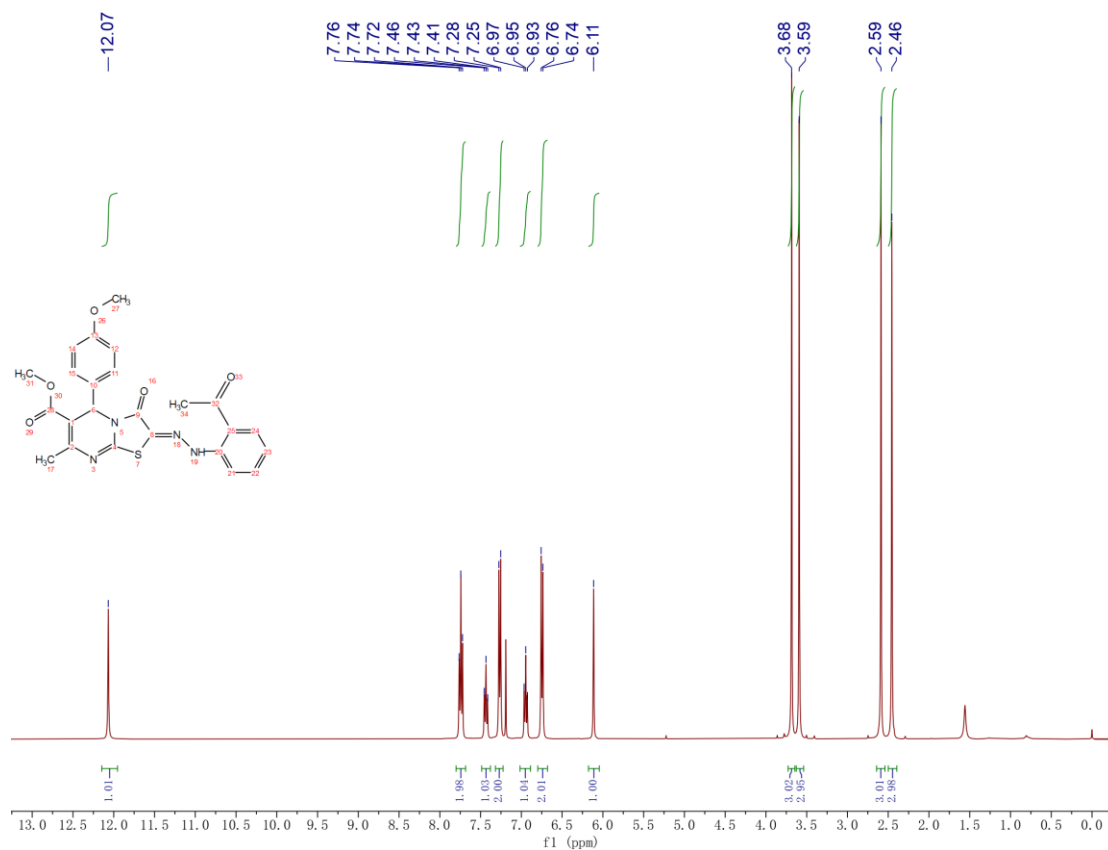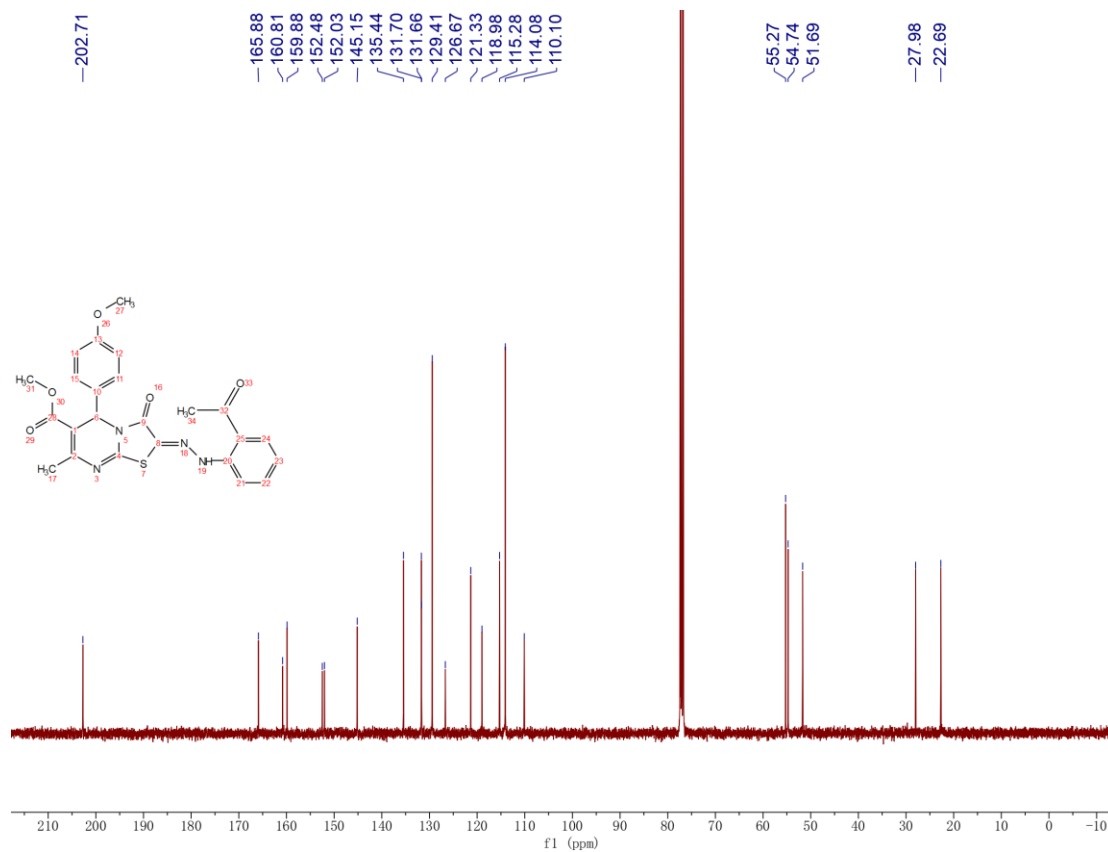

*Methyl 2-(2-(2-(methoxycarbonyl)phenyl)hydrazineylidene)-5-(4-methoxyphenyl)-7-methyl-3-oxo-2, 3-dihydro-5H-thiazolo[3, 2-a]pyrimidine-6-carboxylate (12b).*

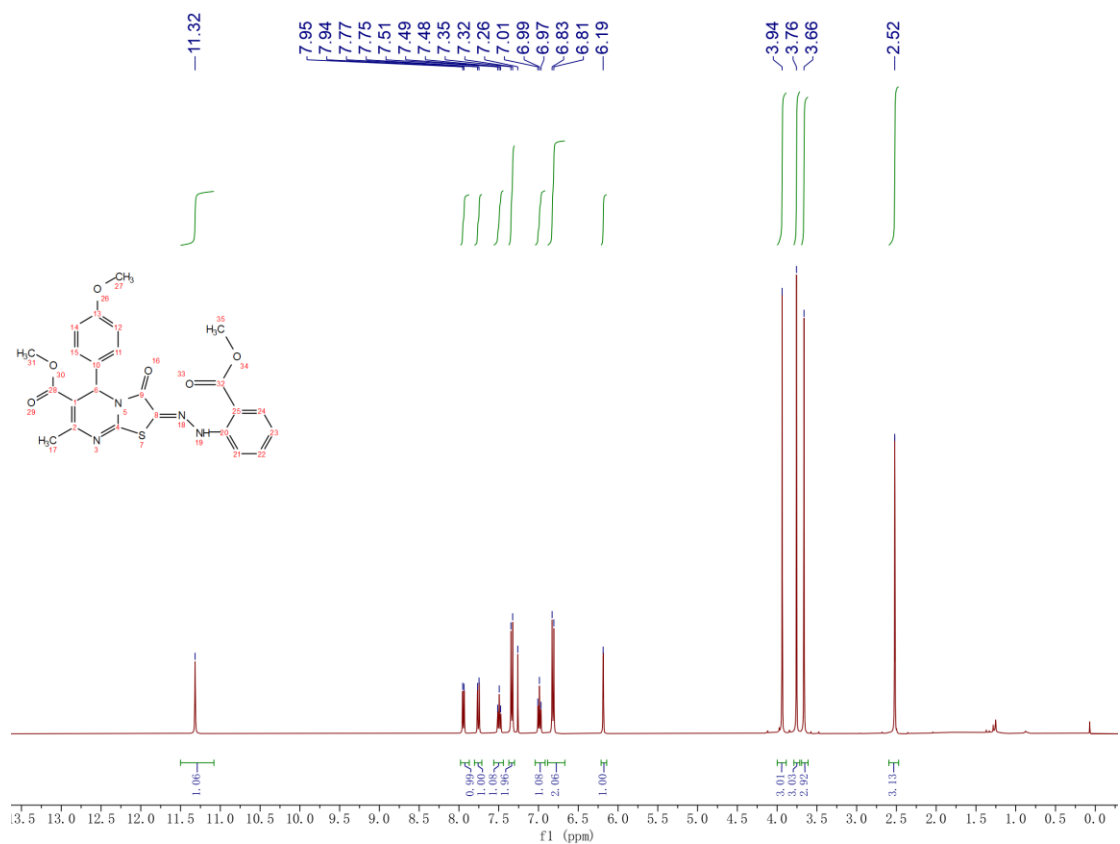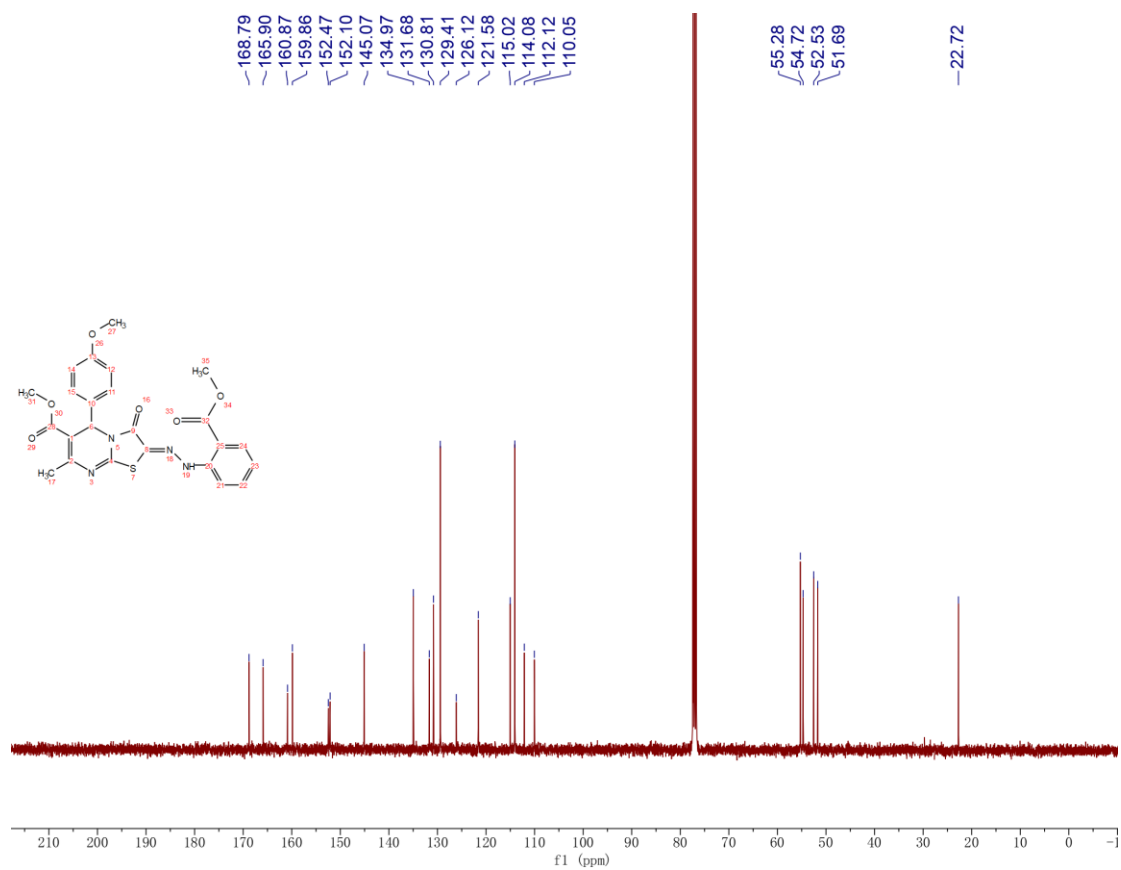

Methyl 2-(2-(3-(methoxycarbonyl)phenyl)hydrazineylidene)-5-(4-methoxyphenyl)-7-methyl-3-oxo-2,3-dihydro-5H-thiazolo[3,2-a]pyrimidine-6-carboxylate (12c).

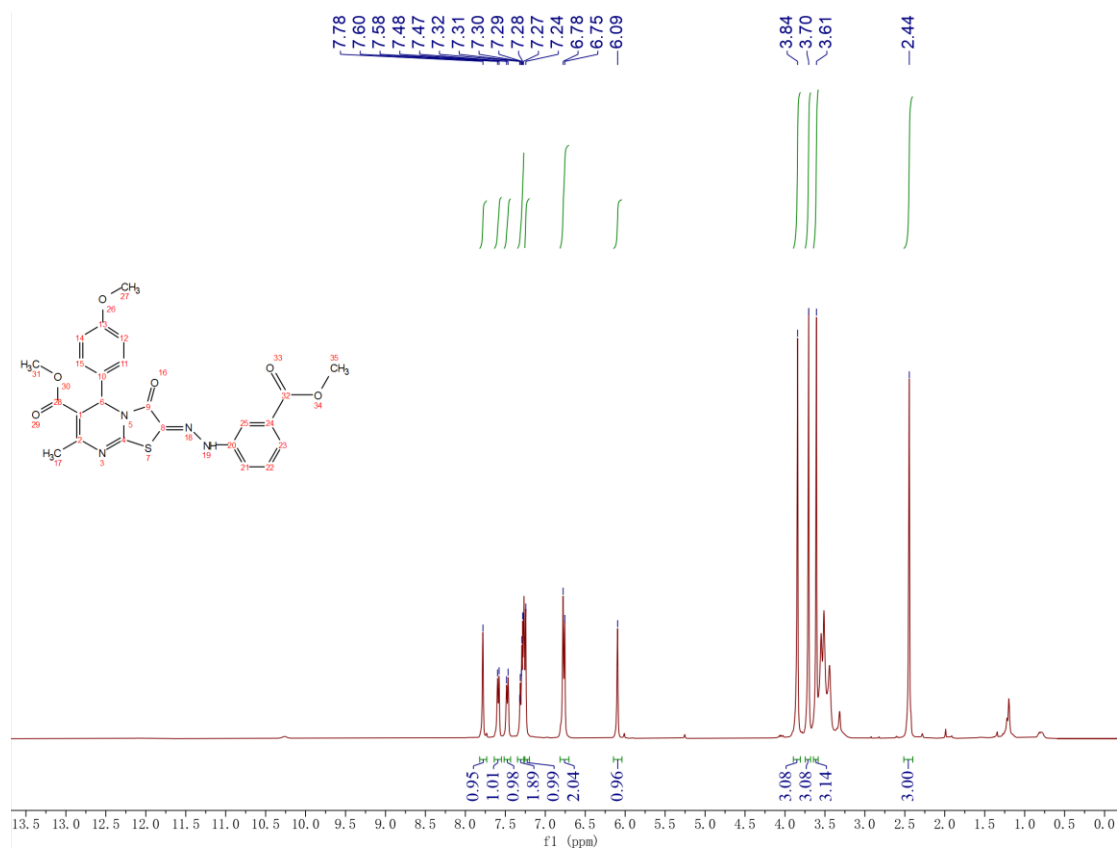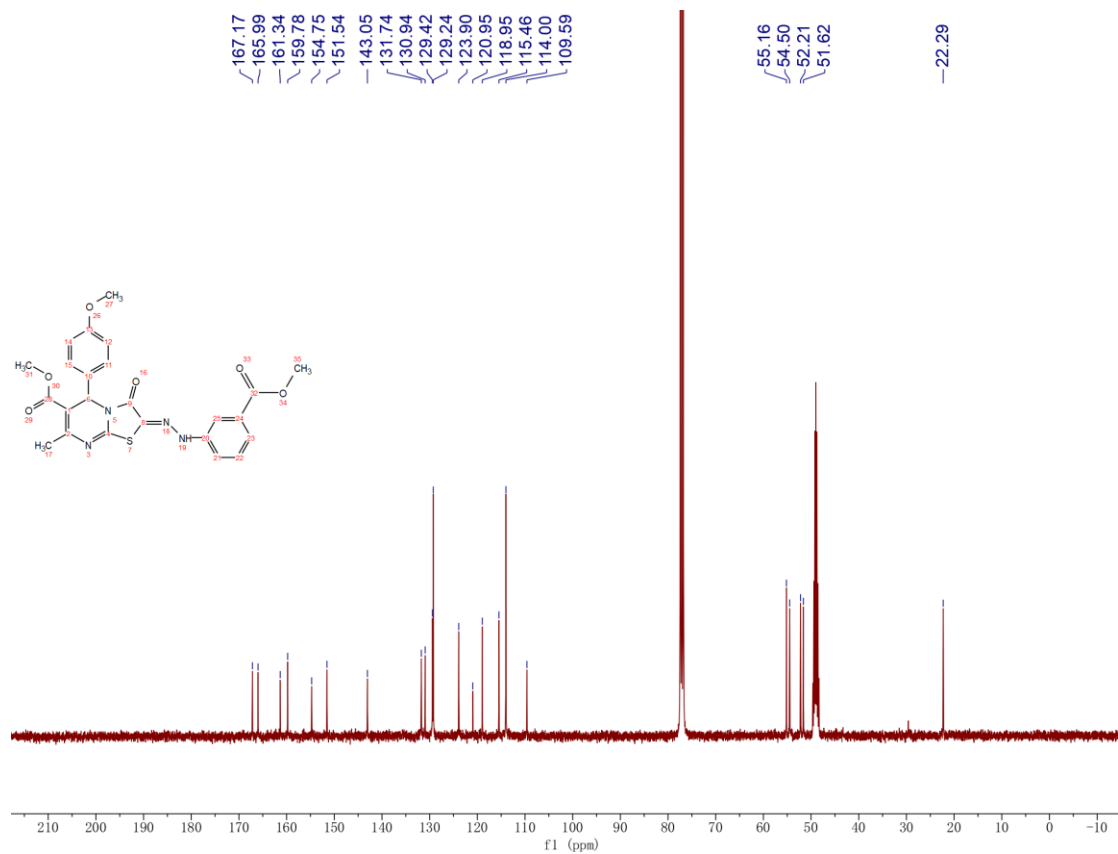

(2-(6-(Methoxycarbonyl)-5-(4-methoxyphenyl)-7-methyl-3-oxo-5H-thiazolo[3, 2-a]pyrimidin-2(3H)-ylidene)hydrazineyl)-3-methylbenzoic acid (**12d**).

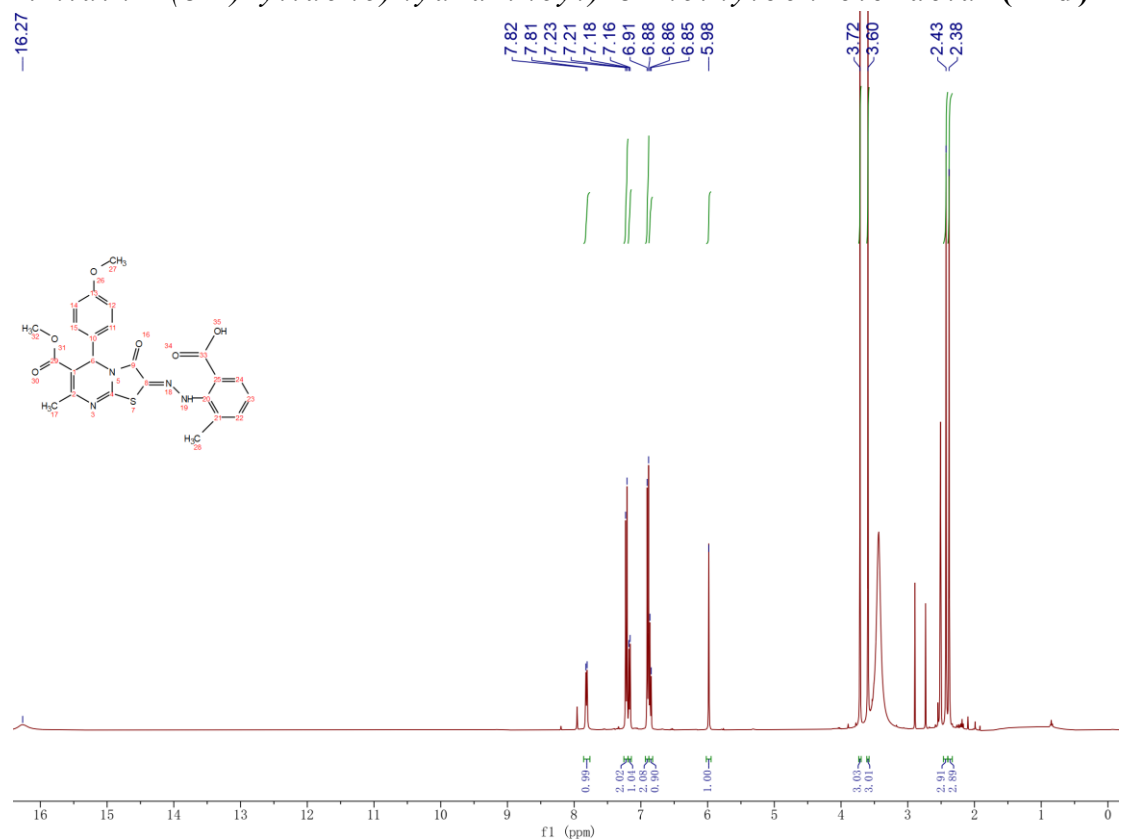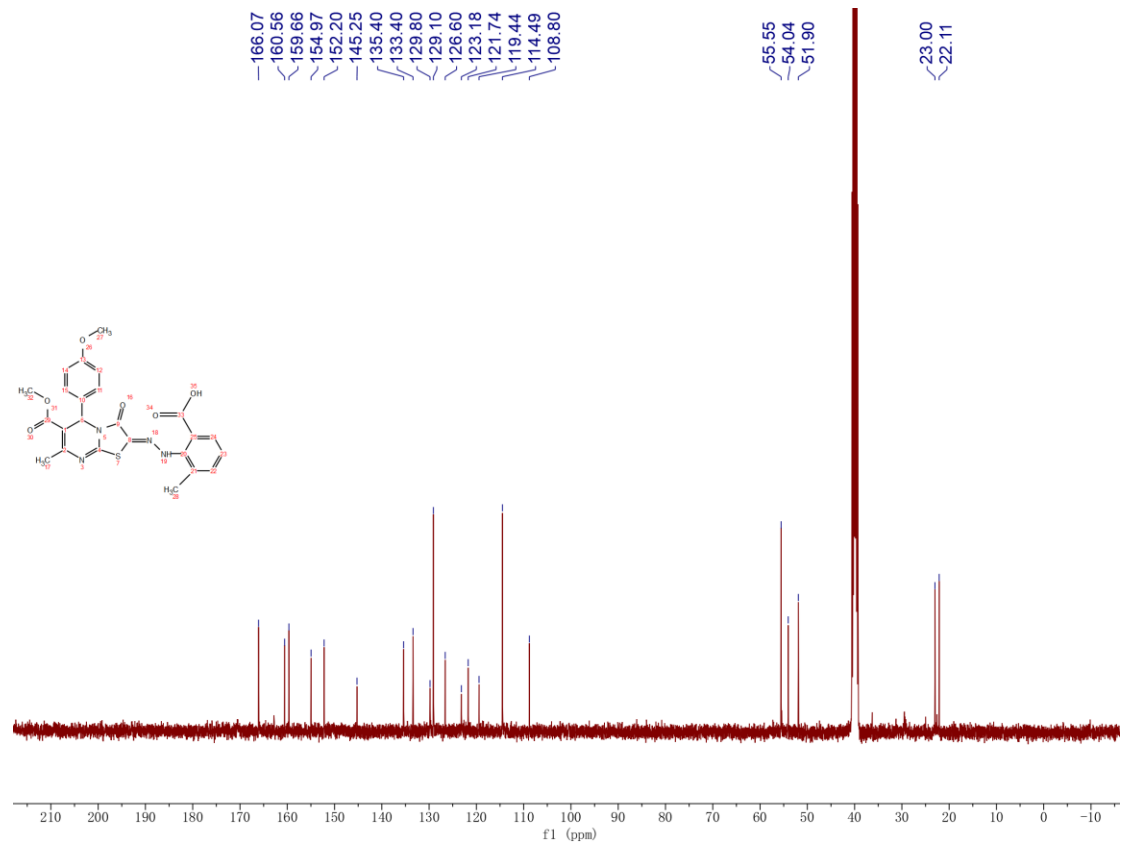

Methyl 5-(4-methoxyphenyl)-7-methyl-3-oxo-2-(2-(3, 4, 5-trimethoxyphenyl)hydrazineylidene)-2, 3-dihydro-5H-thiazolo[3, 2-a]pyrimidine-6-carboxylate (**12e**).

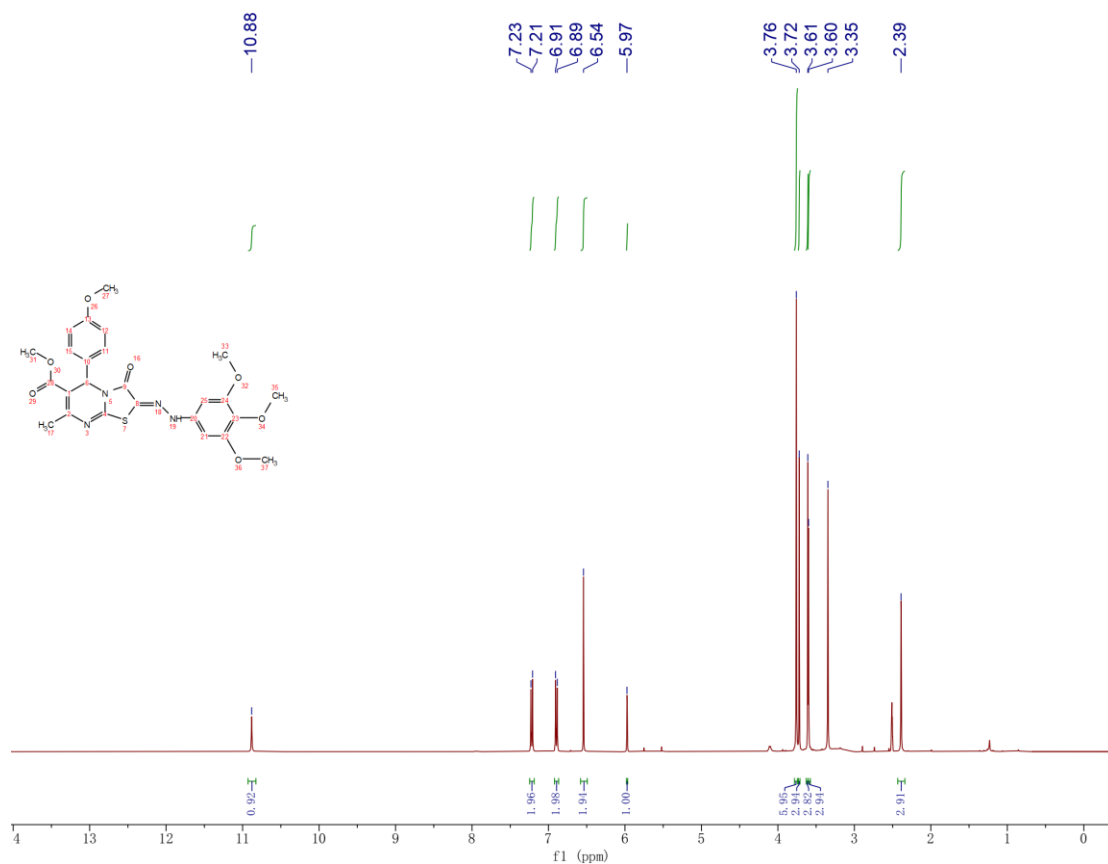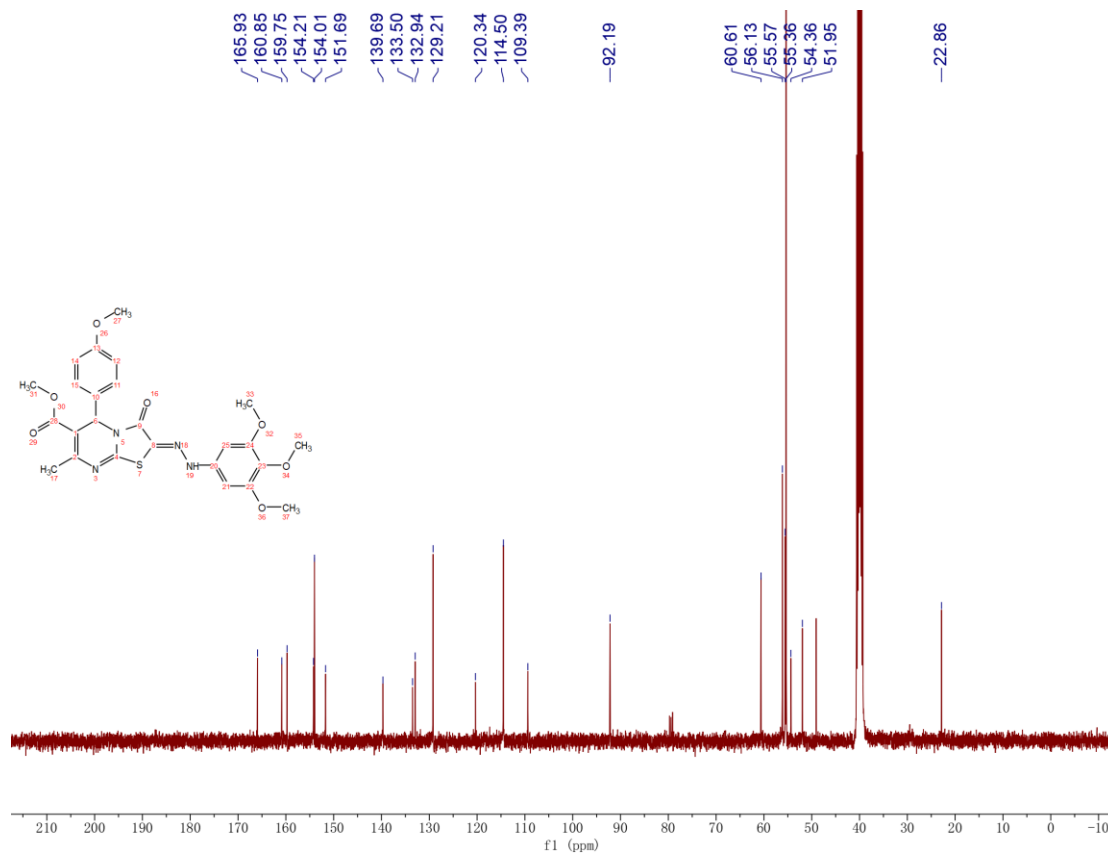

(6-(Methoxycarbonyl)-5-(4-methoxyphenyl)-7-methyl-3-oxo-5H-thiazolo[3, 2-a]pyrimidin-2(3H)-ylidene)hydrazineyl)naphthalene-1-sulfonic acid (**12f**).

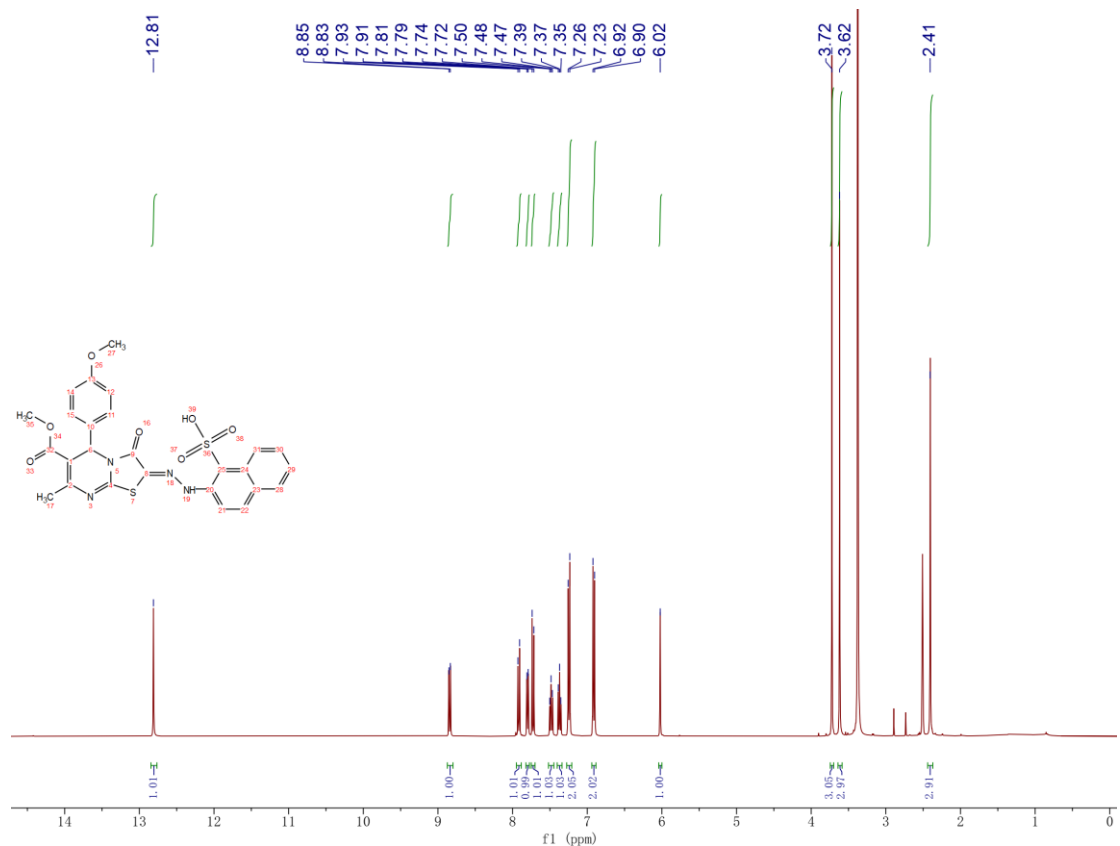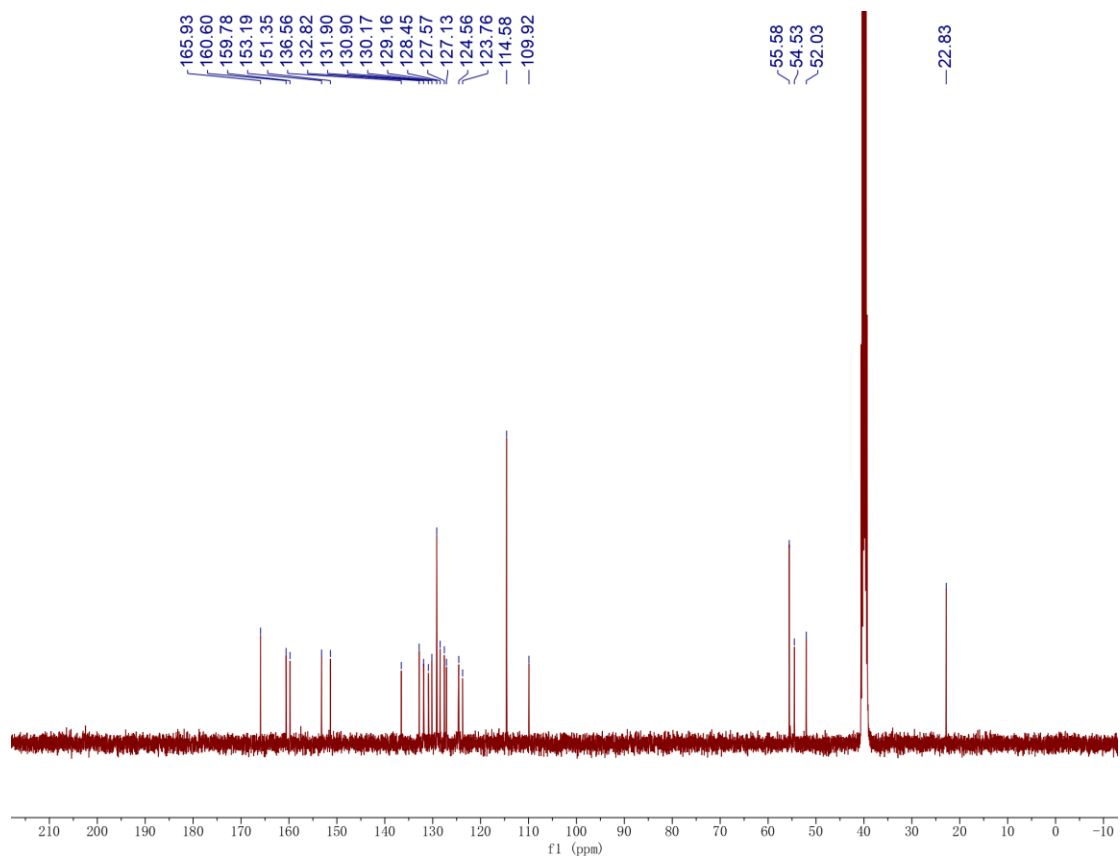

*Methyl 2-(2-(2-methoxyphenyl)hydrazineylidene)-7-methyl-3-oxo-5-(2, 3, 4-trimethoxyphenyl)-2, 3-dihydro-5H-thiazolo[3, 2-a]pyrimidine-6-carboxylate (11a).*

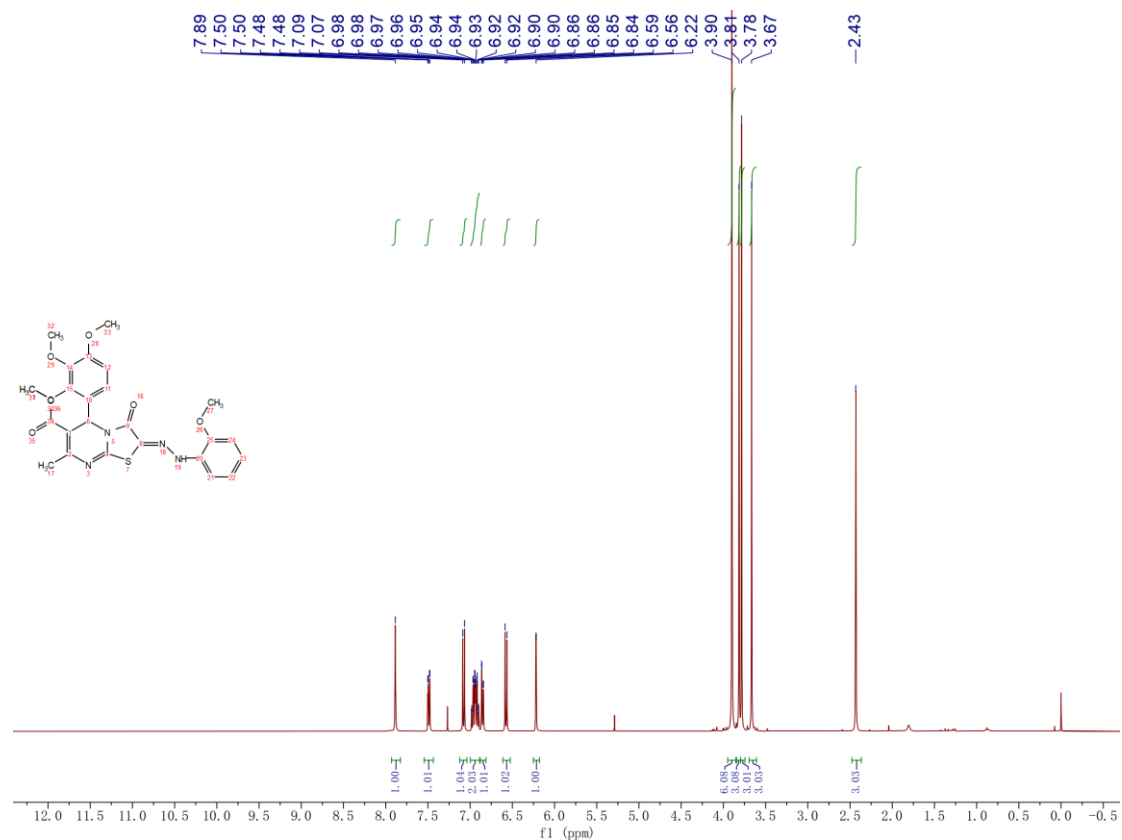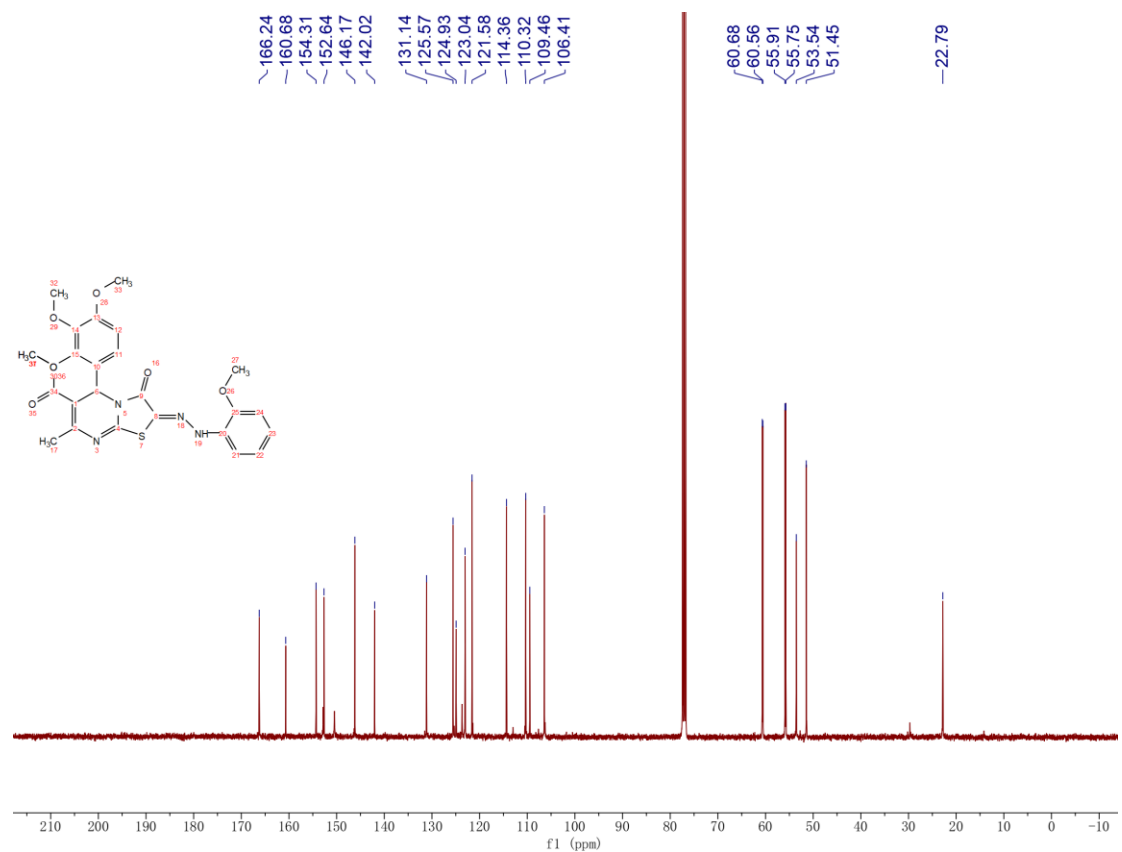

*Methyl 7-methyl-3-oxo-2-(2-phenylhydrazineylidene)-5-(2, 3, 4-trimethoxyphenyl)-2, 3-dihydro-5H-thiazolo[3, 2-a]pyrimidine-6-carboxylate (11b).*

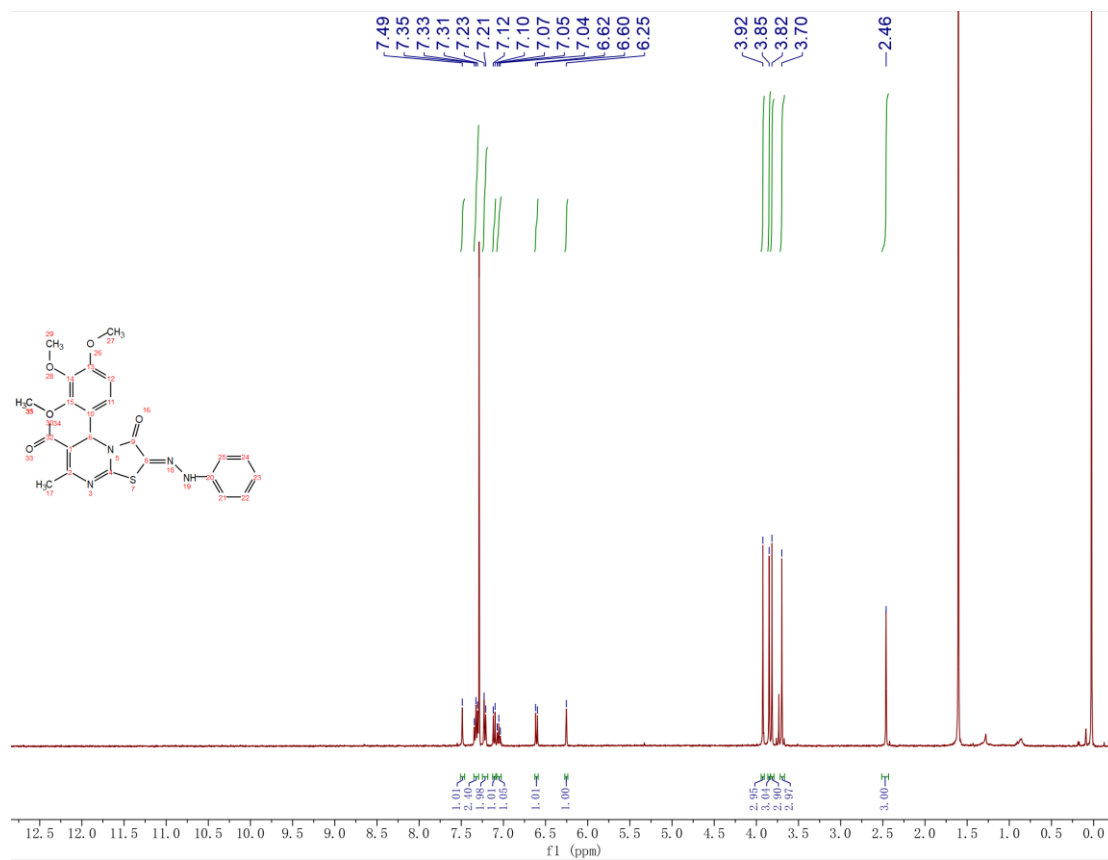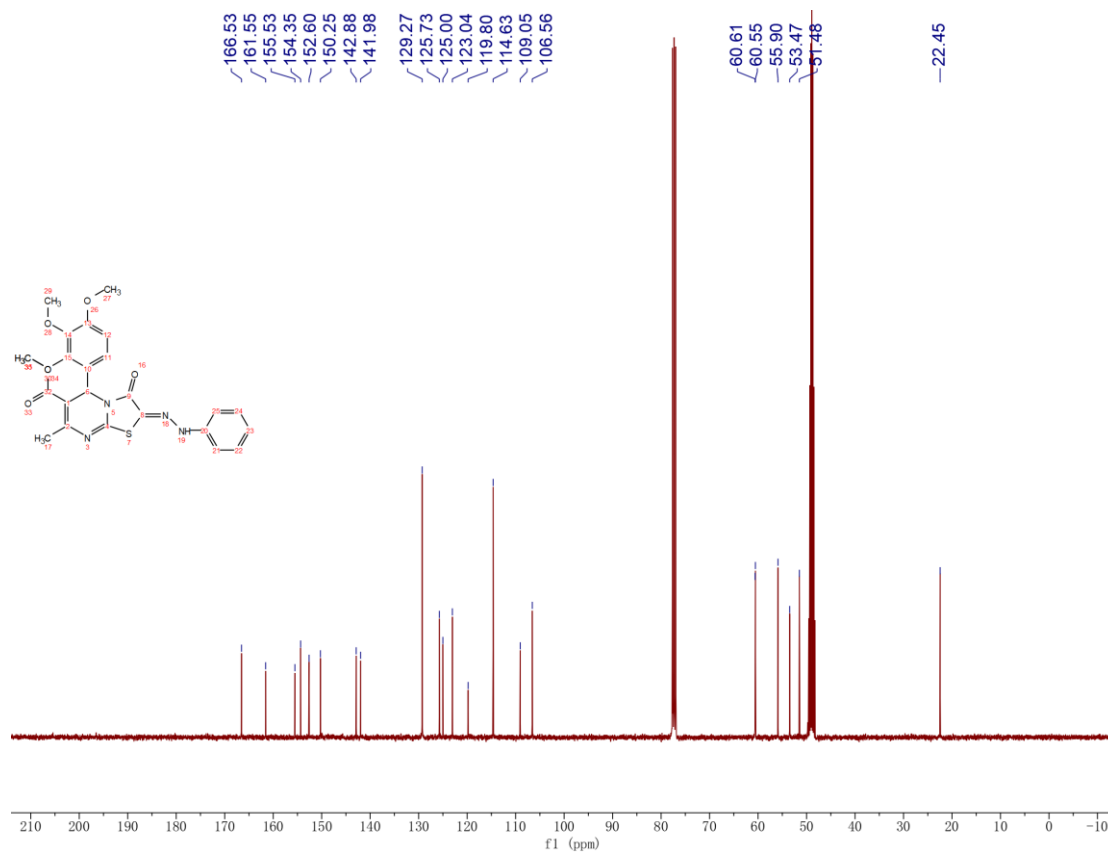

(2-(6-(Methoxycarbonyl)-7-methyl-3-oxo-5-(2, 3, 4-trimethoxyphenyl)-5H-thiazolo[3, 2-a]pyrimidin-2(3H)-ylidene)hydrazineyl)-3-methylbenzoic acid (**11c**).

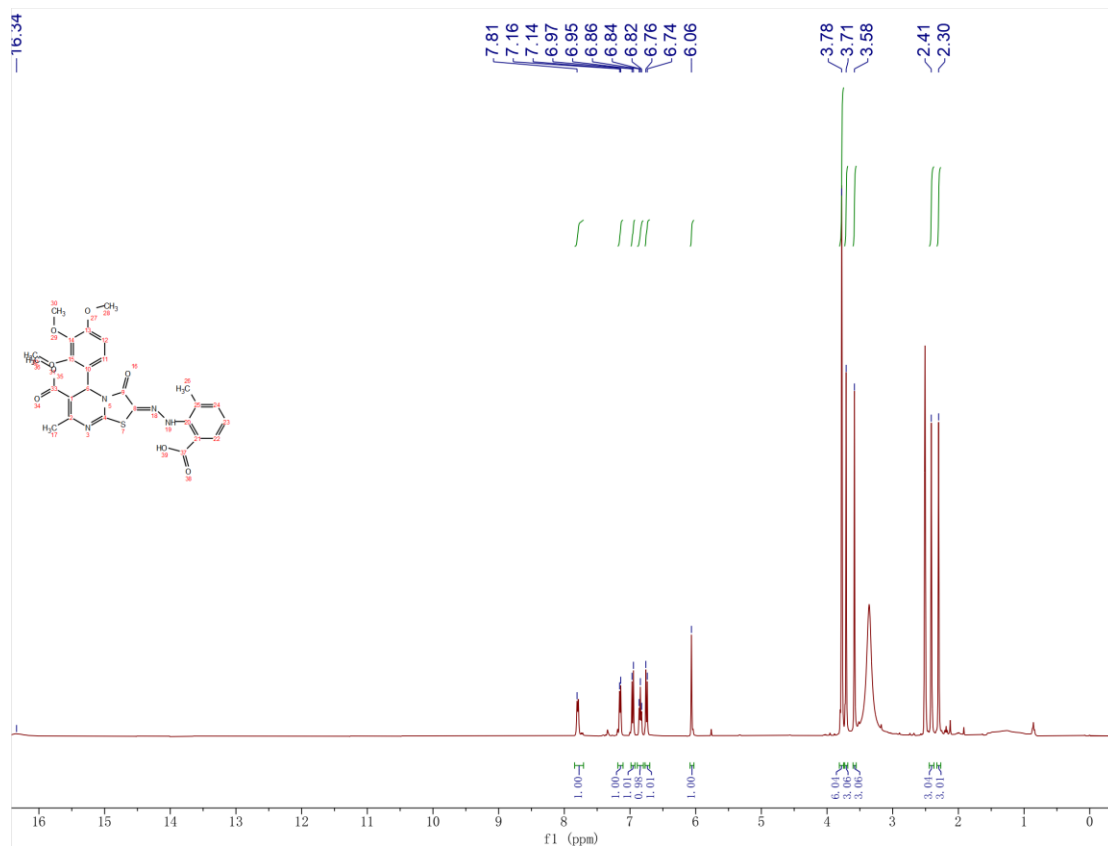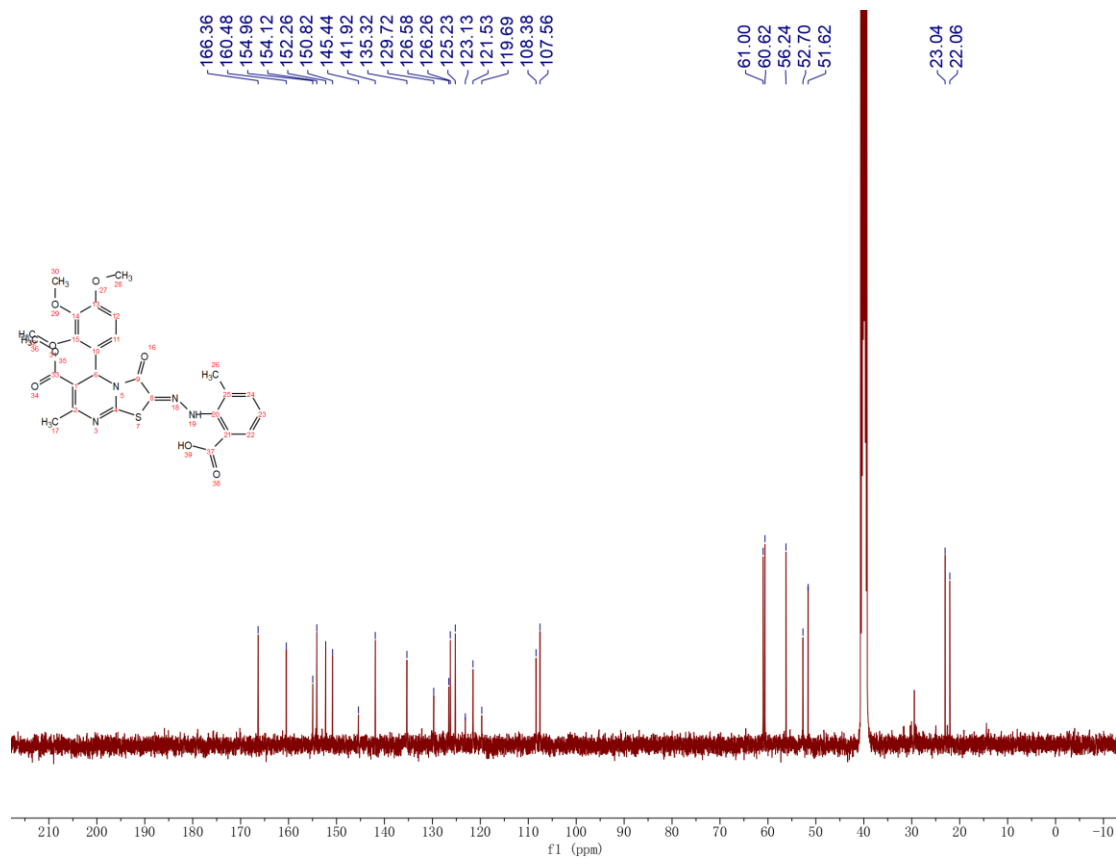

Methyl 7-methyl-2-(2-(3-nitrophenyl)hydrazineylidene)-3-oxo-5-(2, 3, 4-trimethoxyphenyl)-2, 3-dihydro-5H-thiazolo[3, 2-a]pyrimidine-6-carboxylate (**11d**).

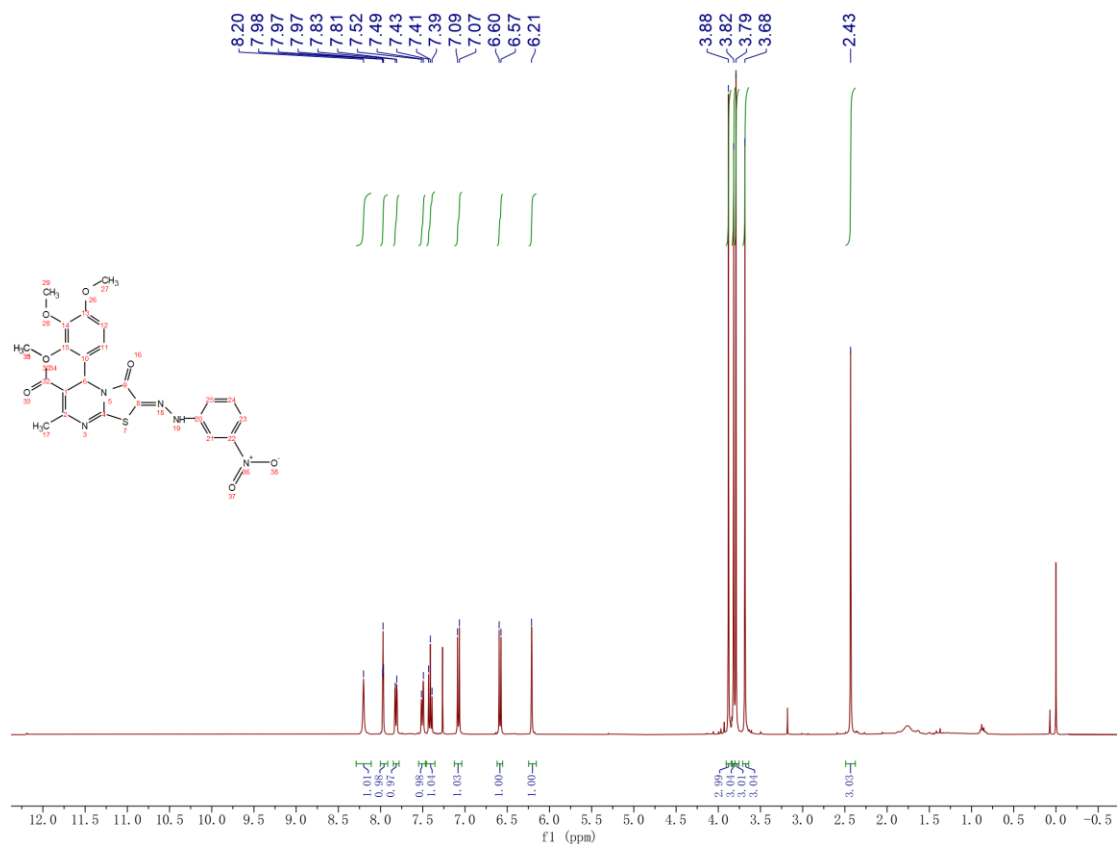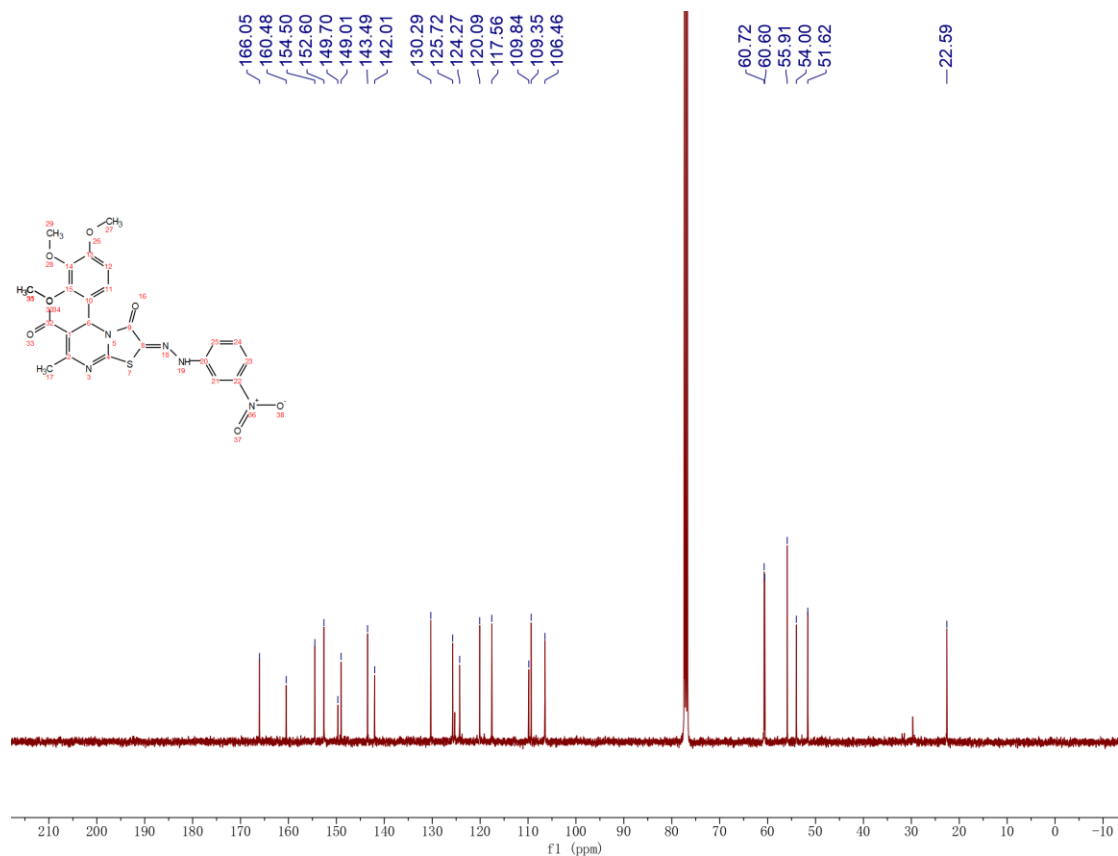

2-(2-(6-(Methoxycarbonyl)-7-methyl-3-oxo-5-(2, 3, 4-trimethoxyphenyl)-5H-thiazolo[3, 2-a]pyrimidin-2(3H)-ylidene)hydrazineyl)benzenesulfonic acid (**11e**).

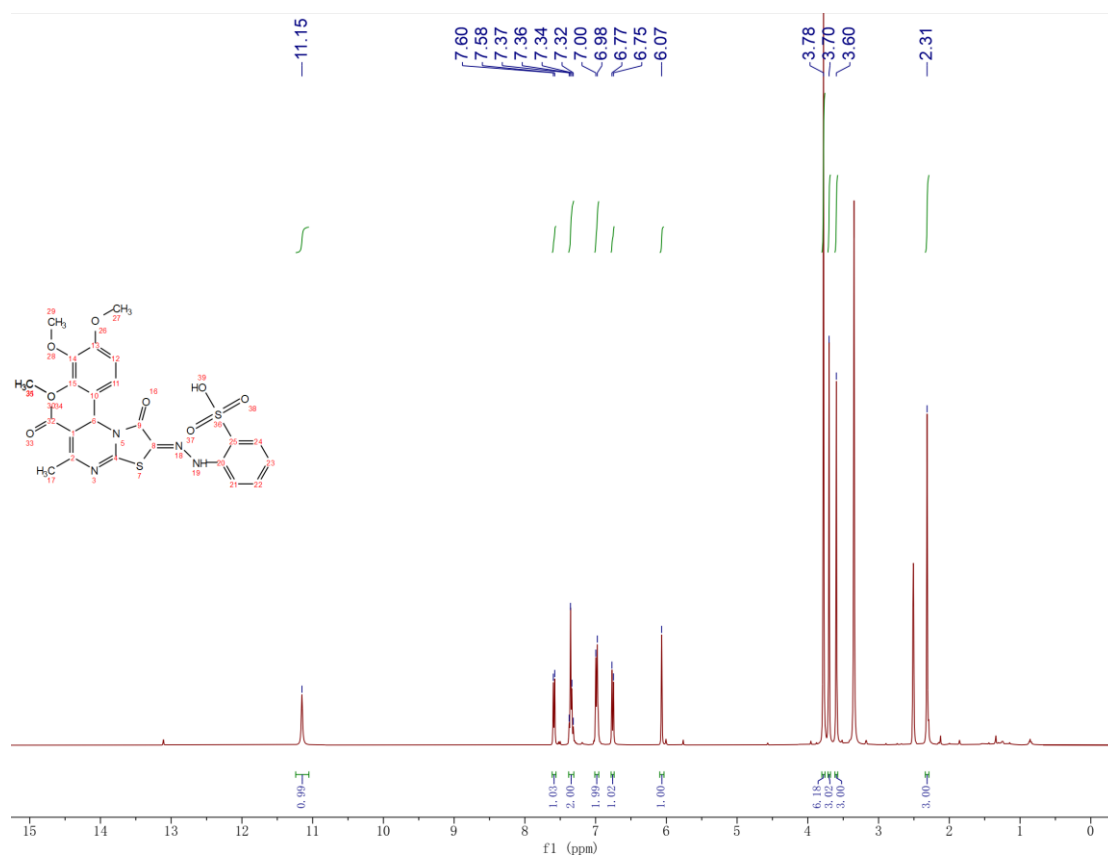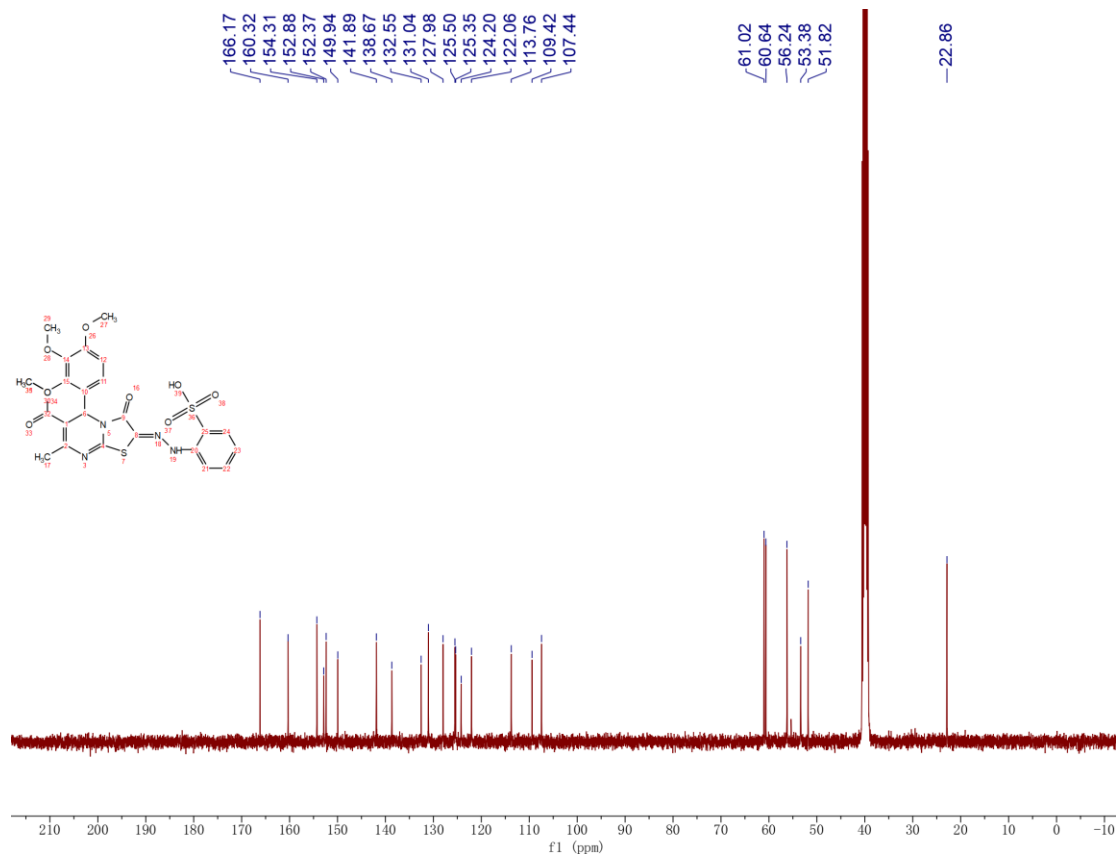

*5-Methoxy-2-(2-(6-(methoxycarbonyl)-7-methyl-3-oxo-5-(2,3,4-trimethoxyphenyl)-5H-thiazolo[3,2-a]pyrimidin-2(3H)-ylidene)hydrazineyl)benzenesulfonic acid (11f).*

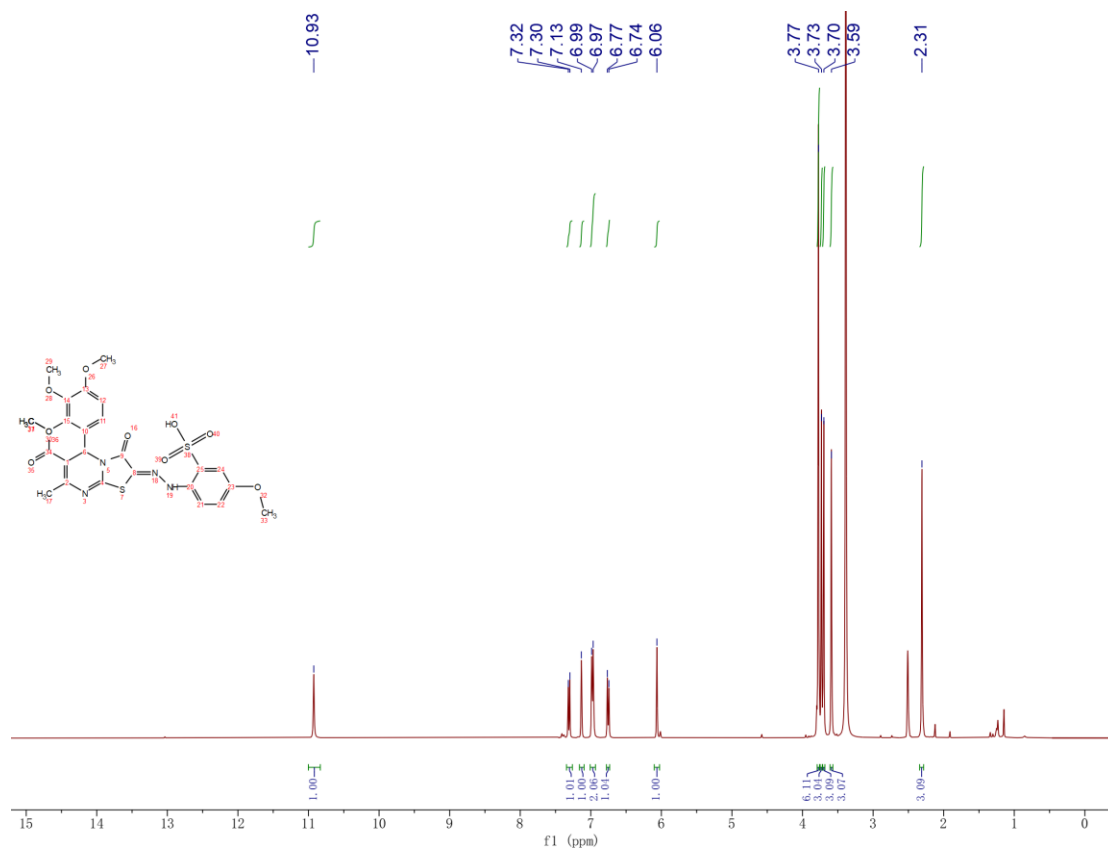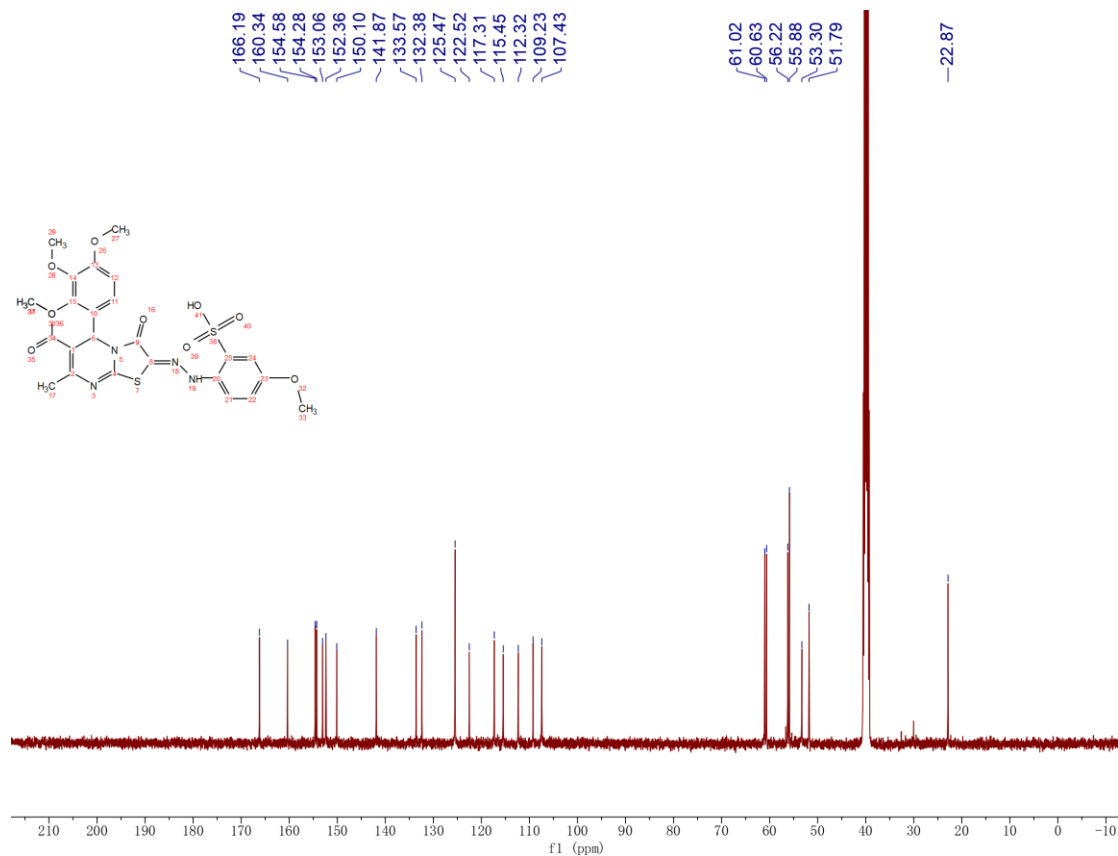

(2-(6-(Methoxycarbonyl)-7-methyl-3-oxo-5-(2, 3, 4-trimethoxyphenyl)-5H-thiazolo[3, 2-a]pyrimidin-2(3H)-ylidene)hydrazineyl)naphthalene-1-sulfonic acid (11g).

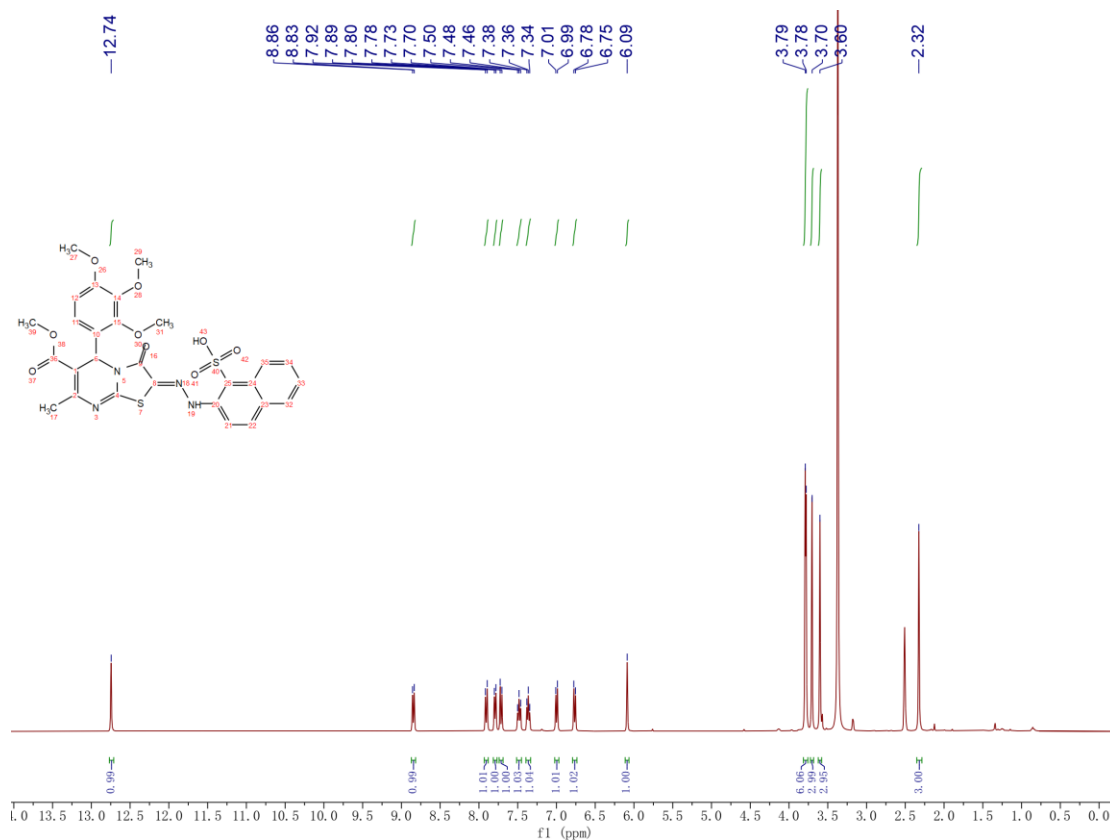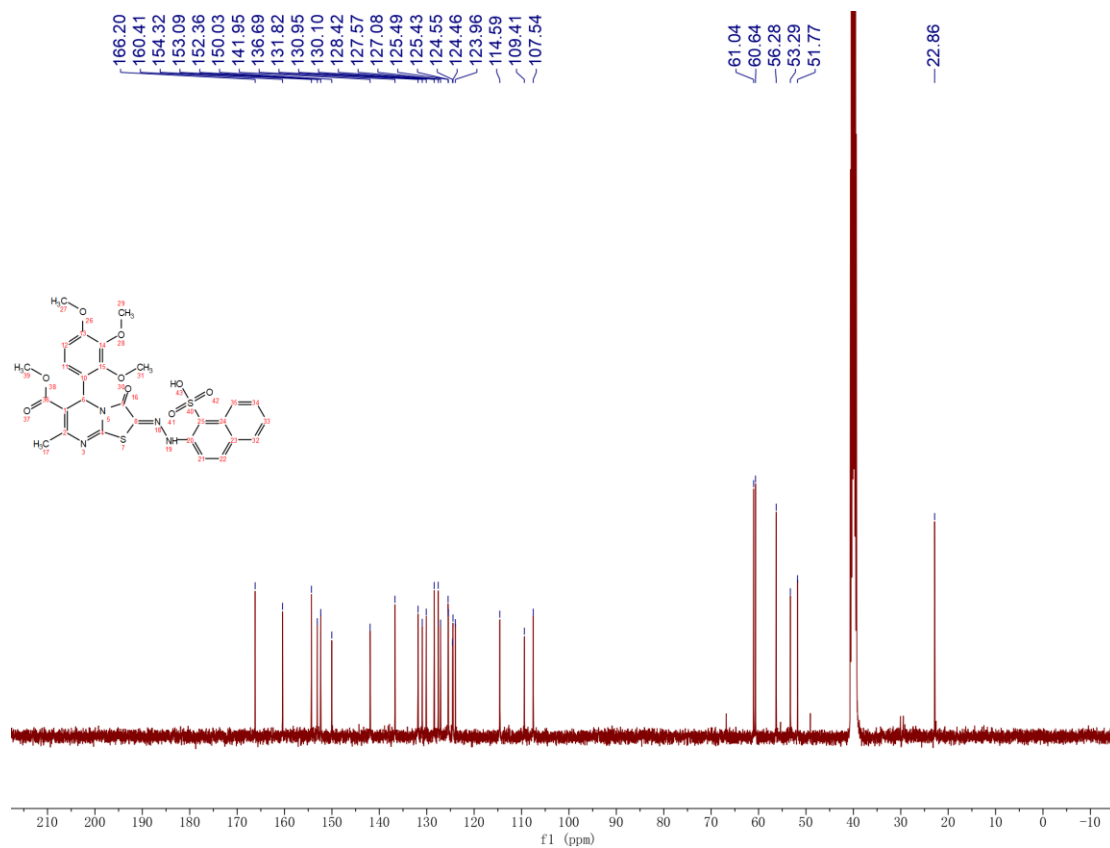

*Methyl 2-(2-(2-(methoxycarbonyl)phenyl)hydrazineylidene)-7-methyl-3-oxo-5-(2, 3, 4-trimethoxyphenyl)-2, 3-dihydro-5H-thiazolo[3, 2-a]pyrimidine-6-carboxylate (11h).*

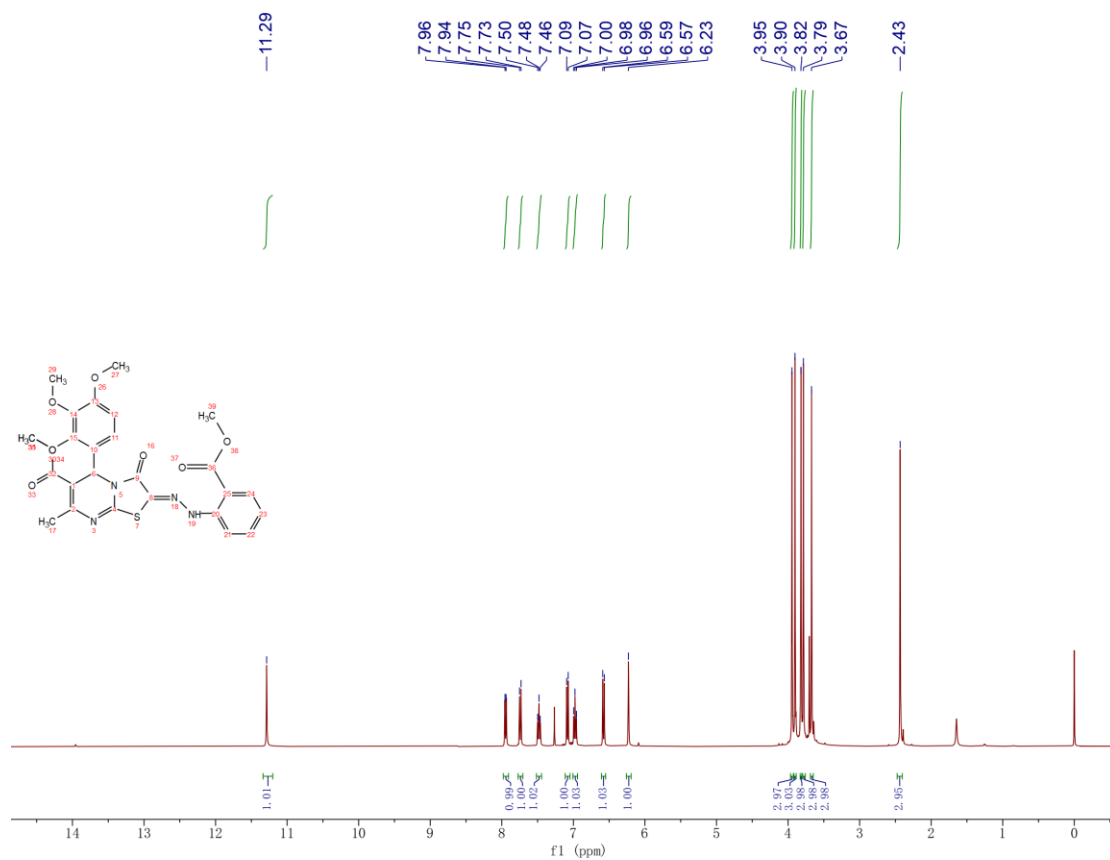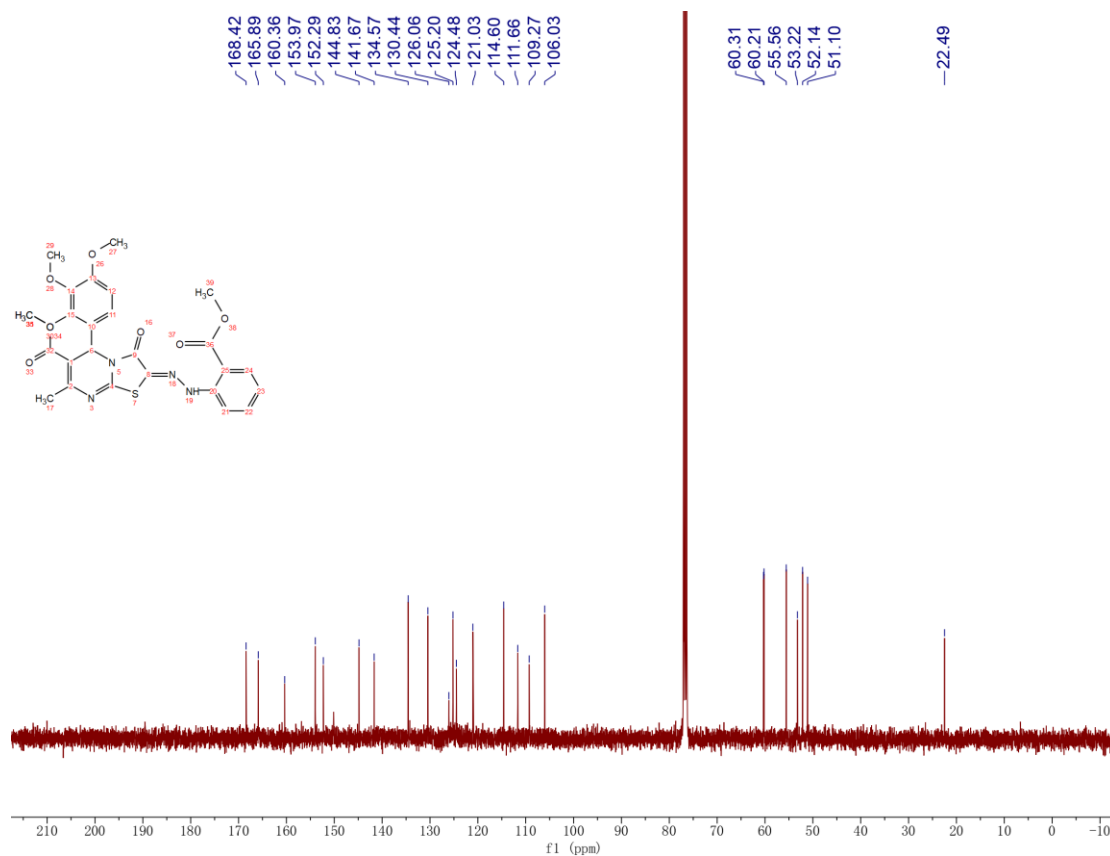

Methyl 2-(2-(2-acetylphenyl)hydrazineylidene)-7-methyl-3-oxo-5-(2, 3, 4-trimethoxyphenyl)-2, 3-dihydro-5H-thiazolo[3, 2-a]pyrimidine-6-carboxylate (**11i**).

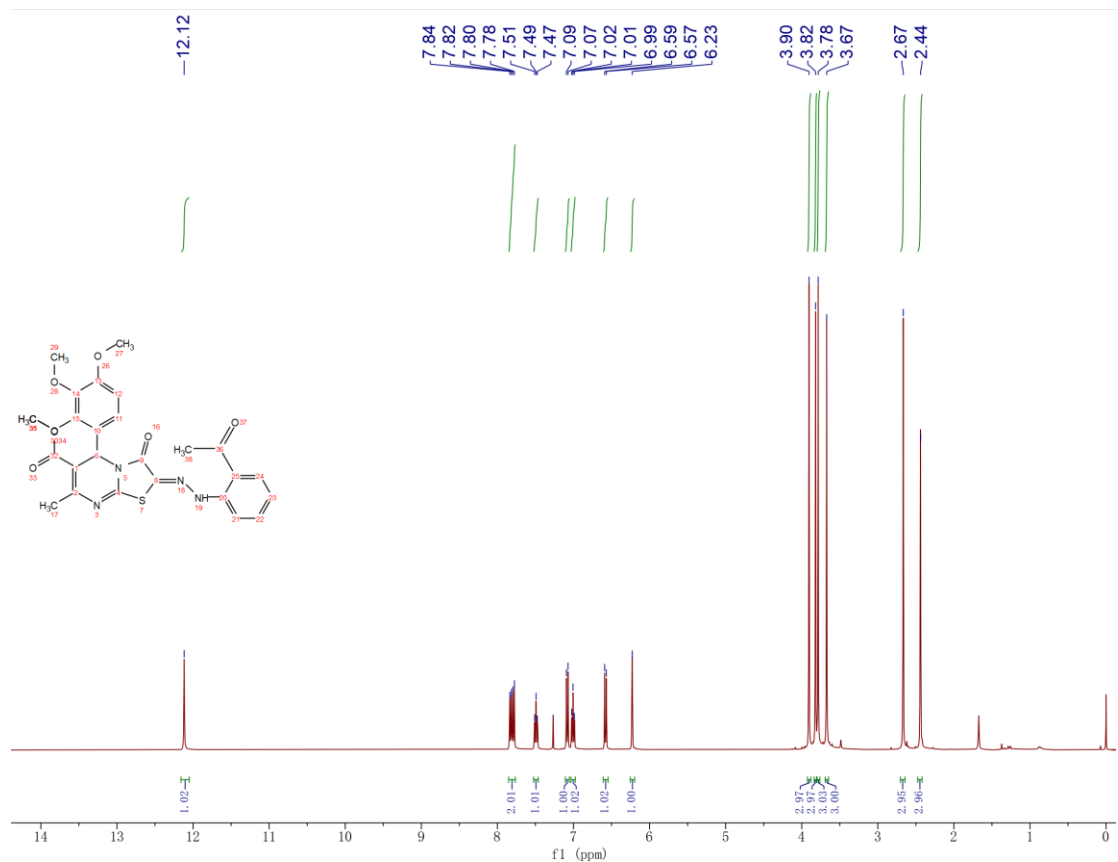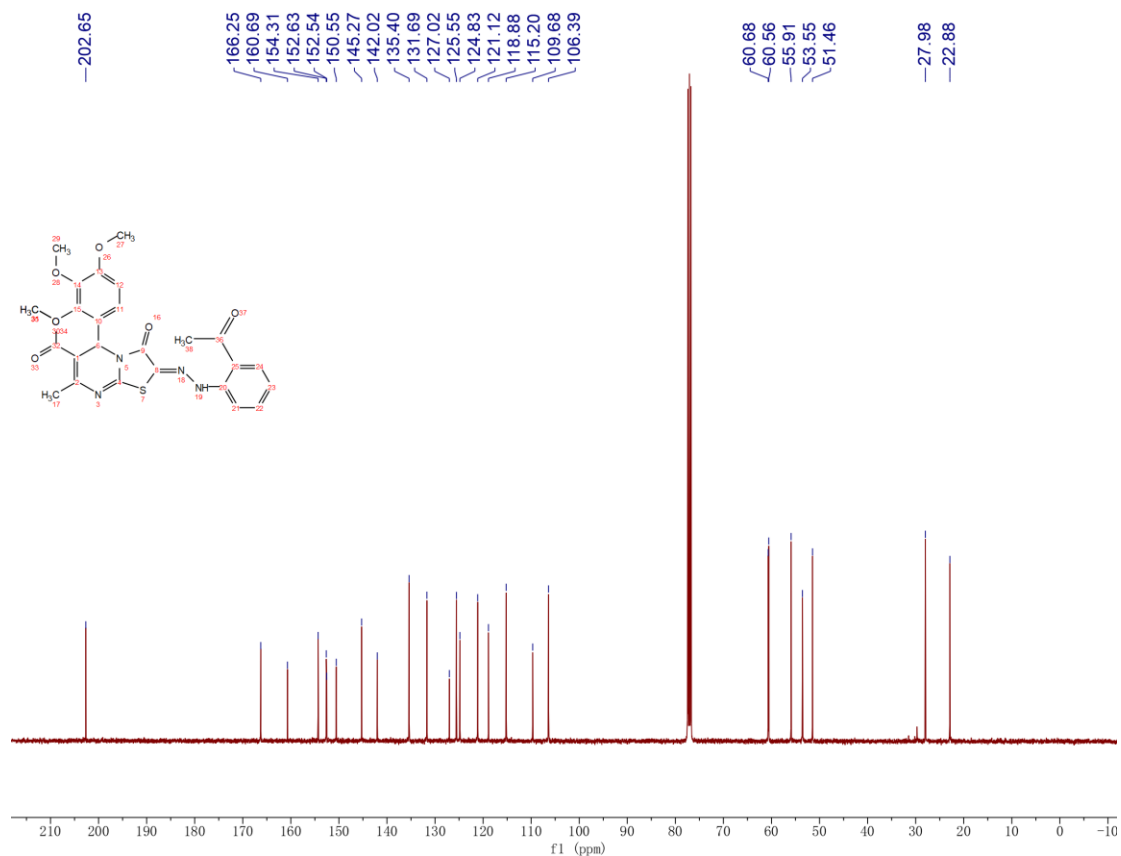

*Methyl 2-(2-(3-(methoxycarbonyl)phenyl)hydrazineylidene)-7-methyl-3-oxo-5-(2, 3, 4-trimethoxyphenyl)-2, 3-dihydro-5H-thiazolo[3, 2-a]pyrimidine-6-carboxylate (11j).*

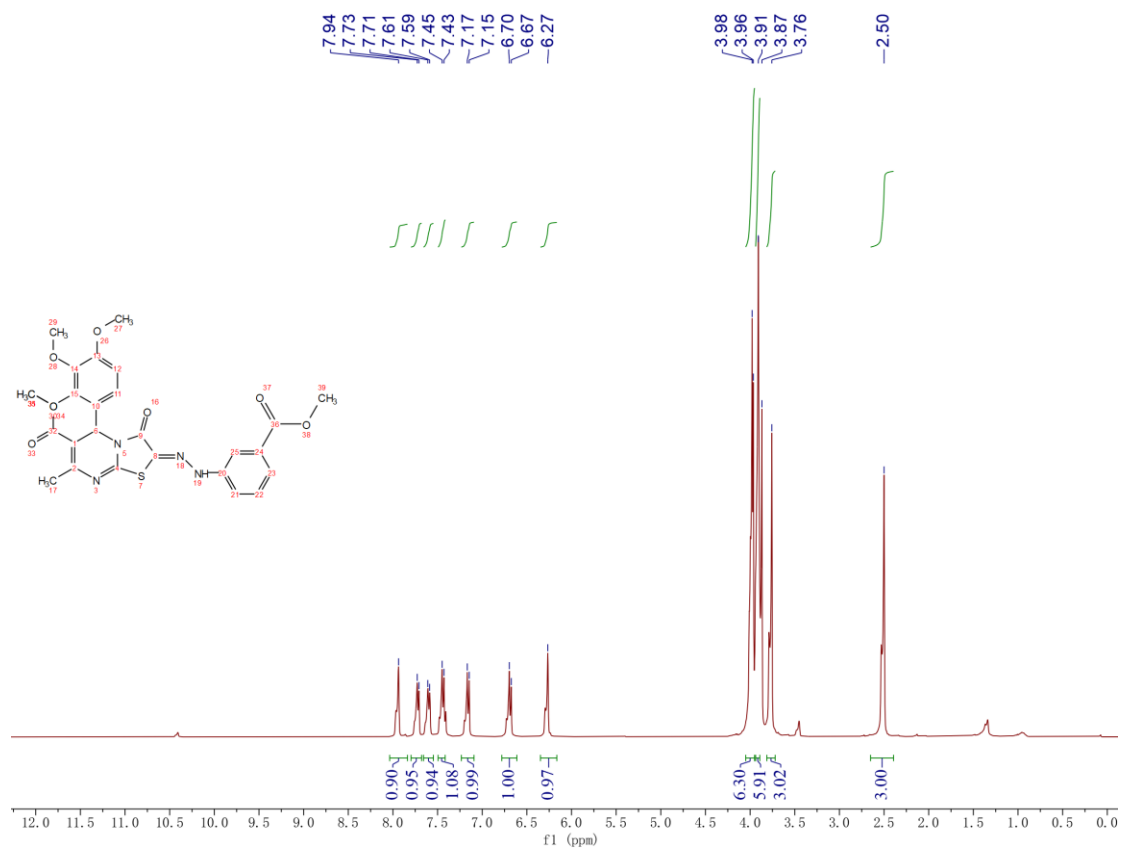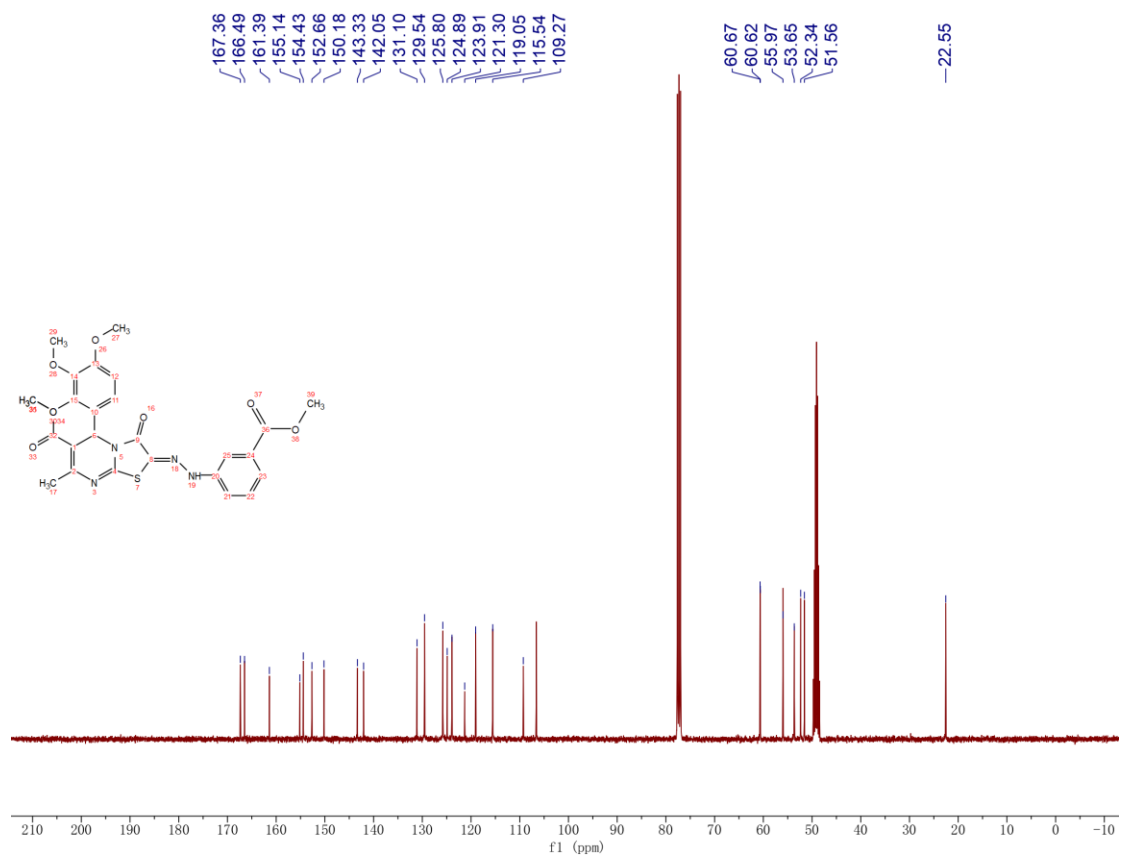

*Methyl 2-(2-(3-acetylphenyl)hydrazineylidene)-7-methyl-3-oxo-5-(2, 3, 4-trimethoxyphenyl)-2, 3-dihydro-5H-thiazolo[3, 2-a]pyrimidine-6-carboxylate (11k).*

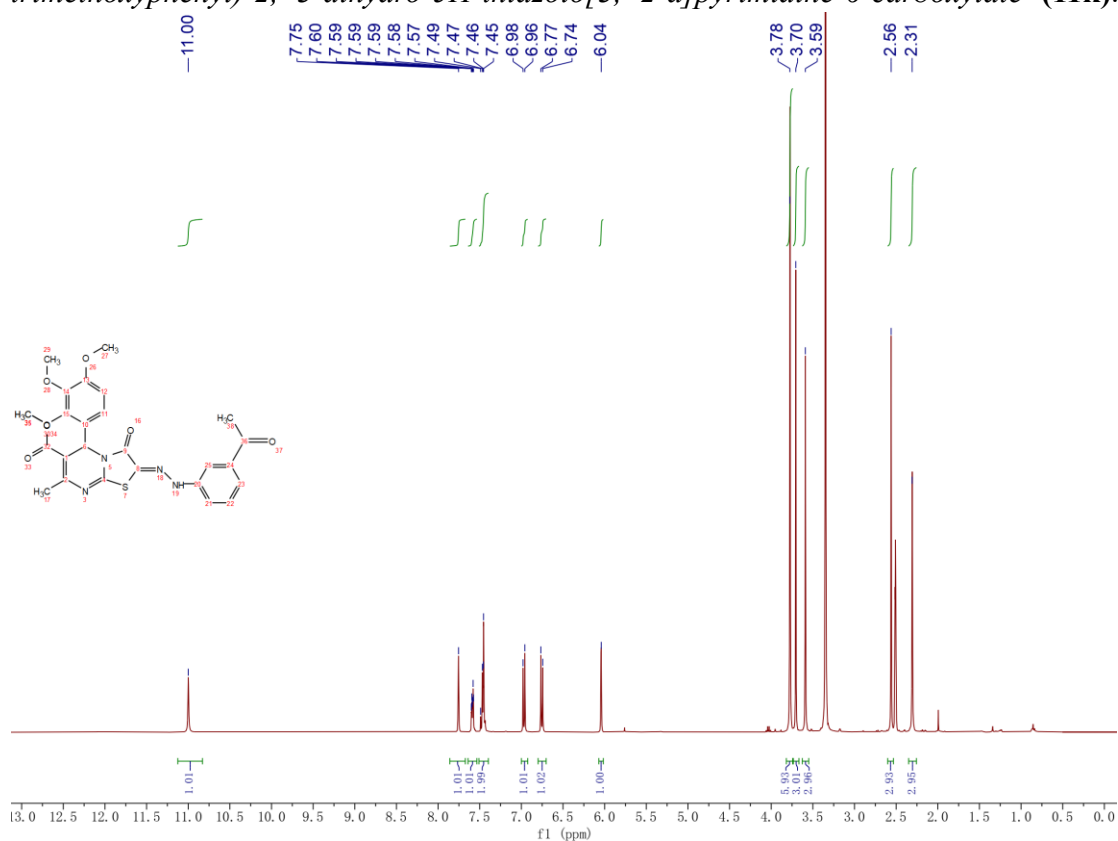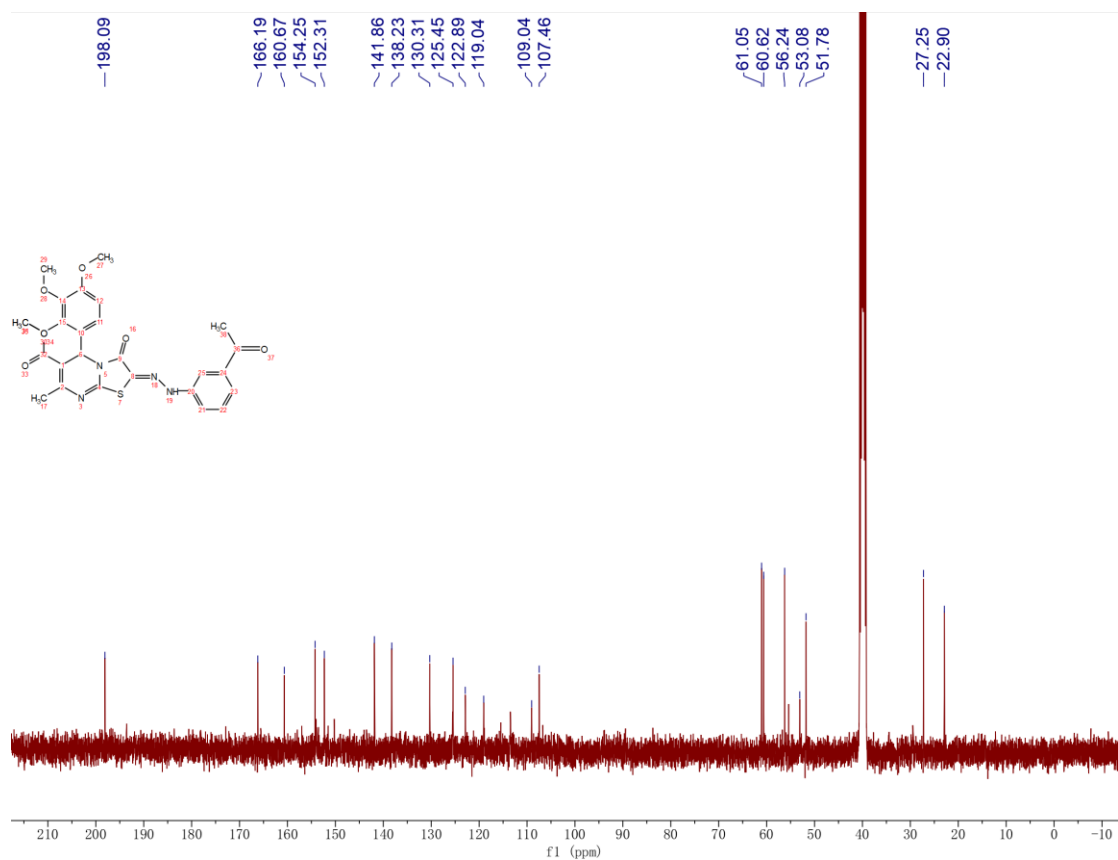

HRMS

Compound 10b [M + H]<sup>+</sup>

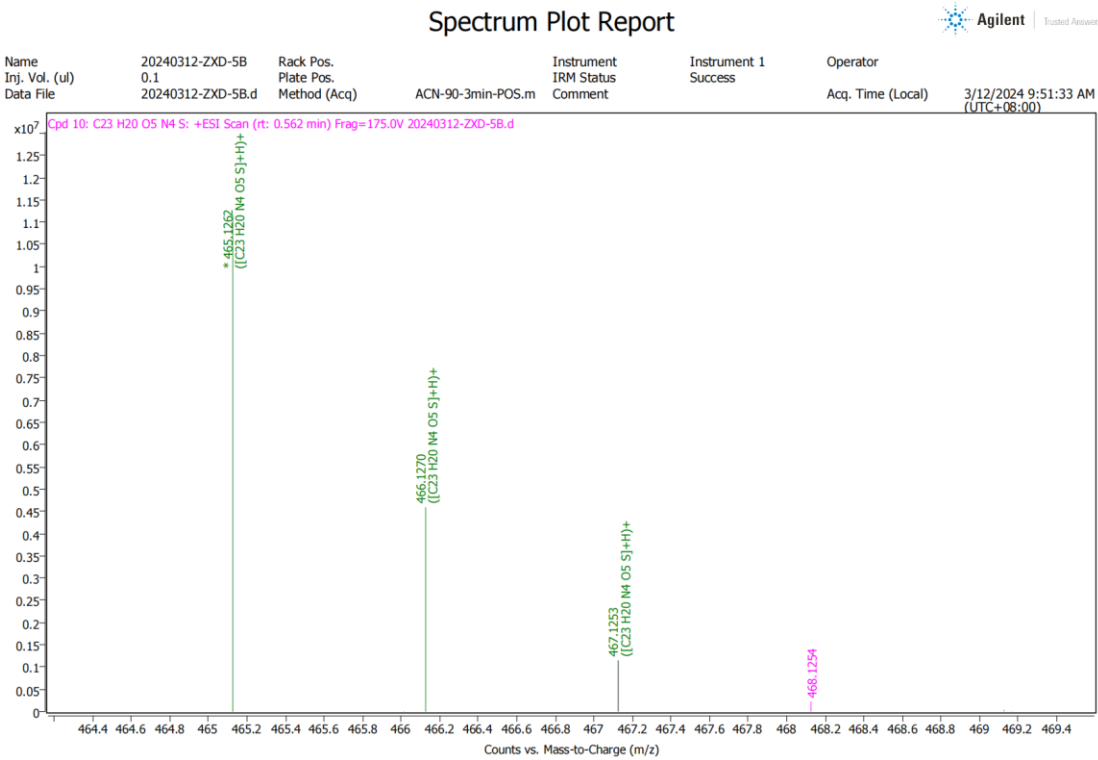

Compound 10c [M + H]<sup>+</sup>

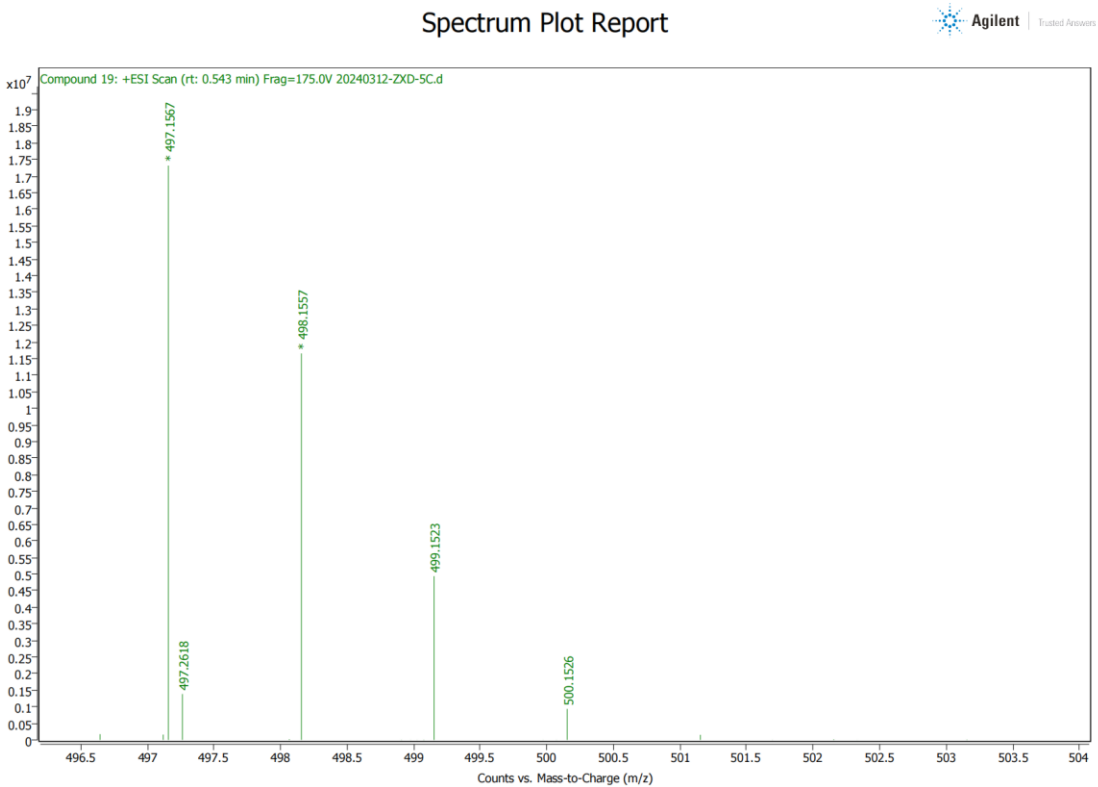

## Compound 10d [M + H]<sup>+</sup>

### Spectrum Plot Report

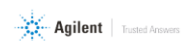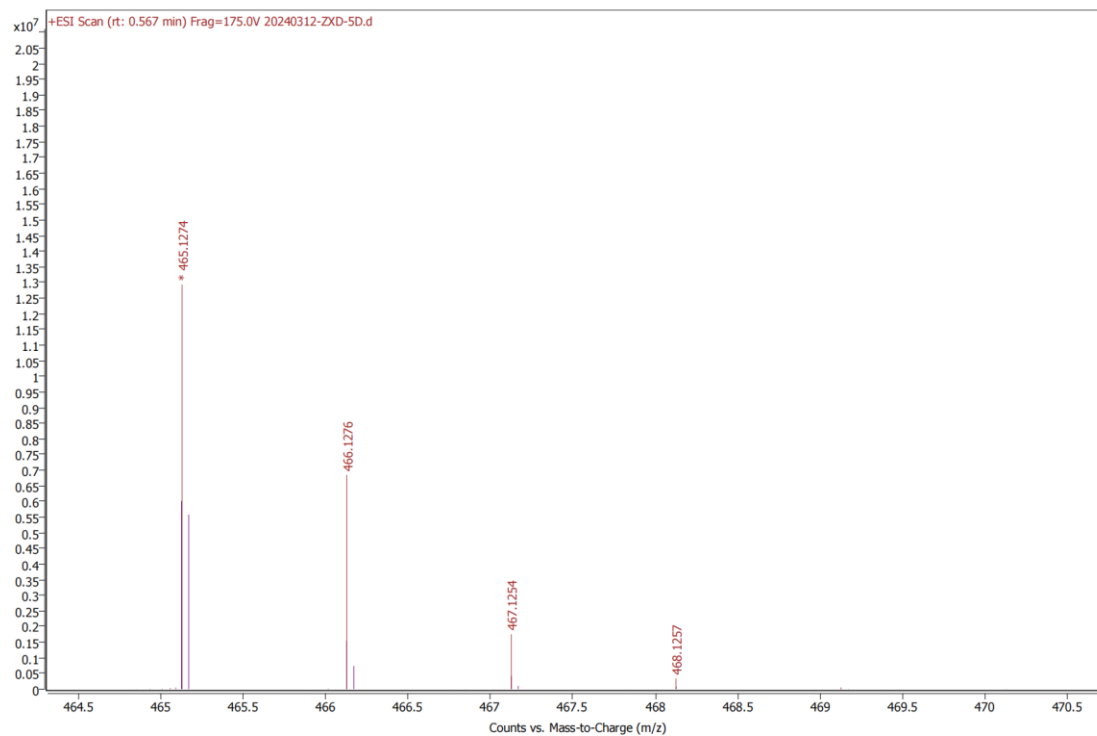

## Compound 10e [M + H]<sup>+</sup>

### Spectrum Plot Report

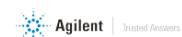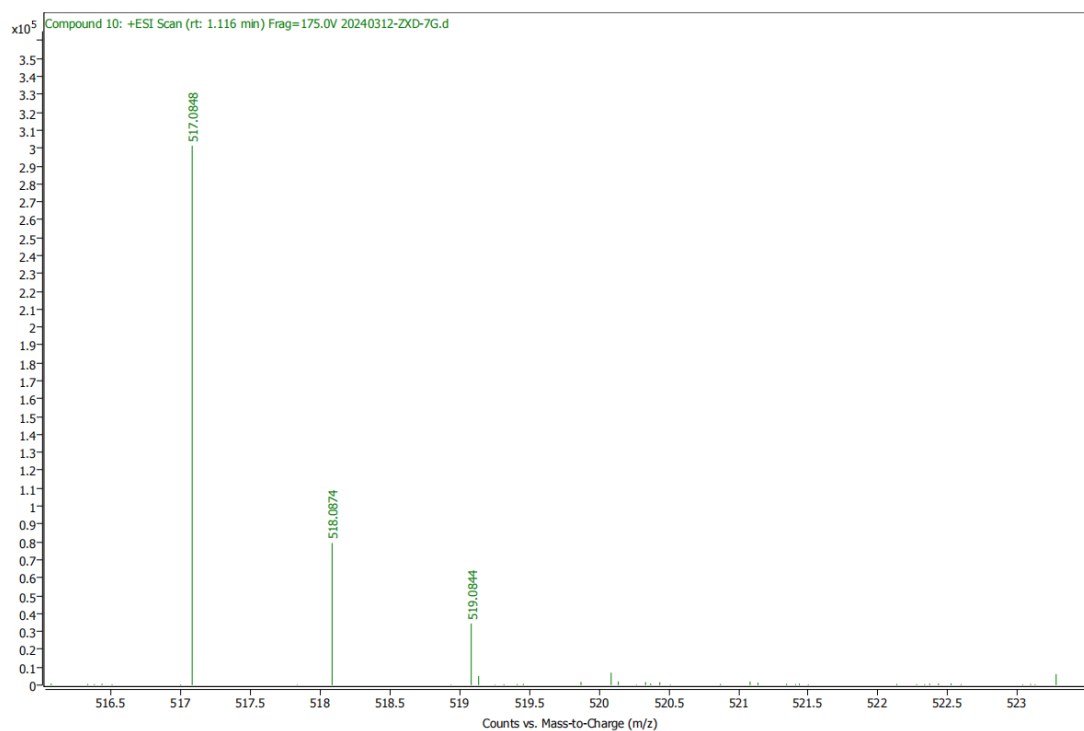

## Compound 10h [M + H]<sup>+</sup>

### Spectrum Plot Report

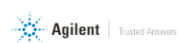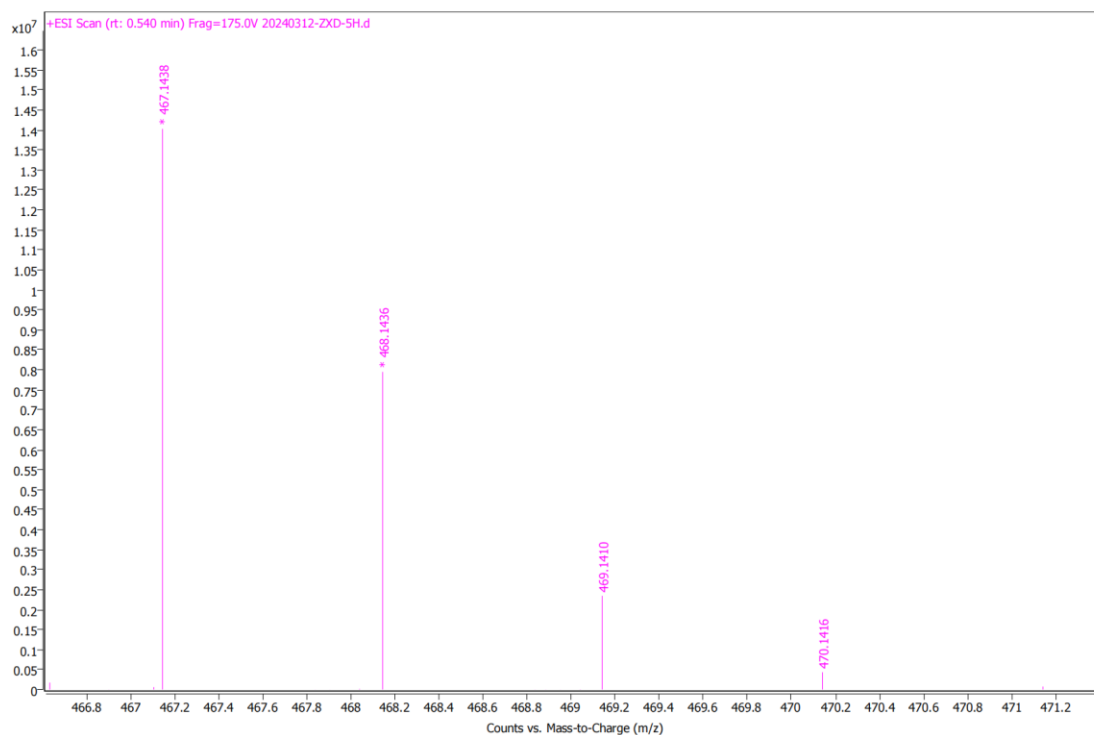

## Compound 10i [M + H]<sup>+</sup>

### Spectrum Plot Report

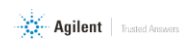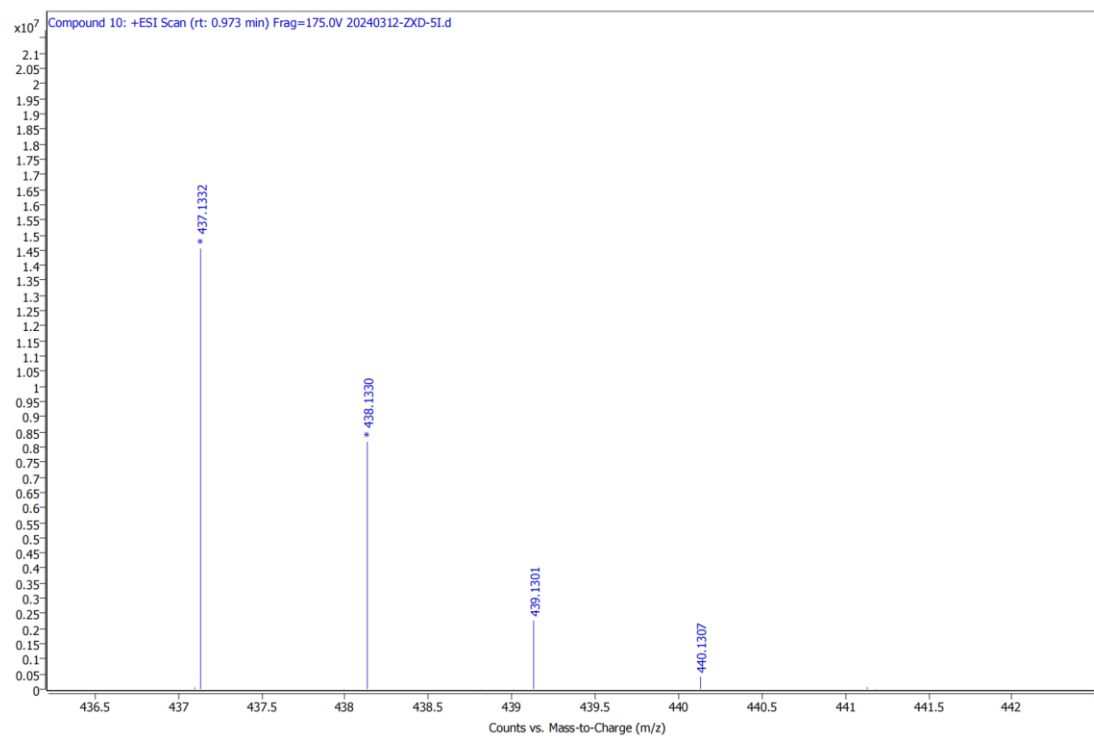

## Compound 10m [M + H]<sup>+</sup>

### Spectrum Plot Report

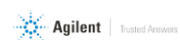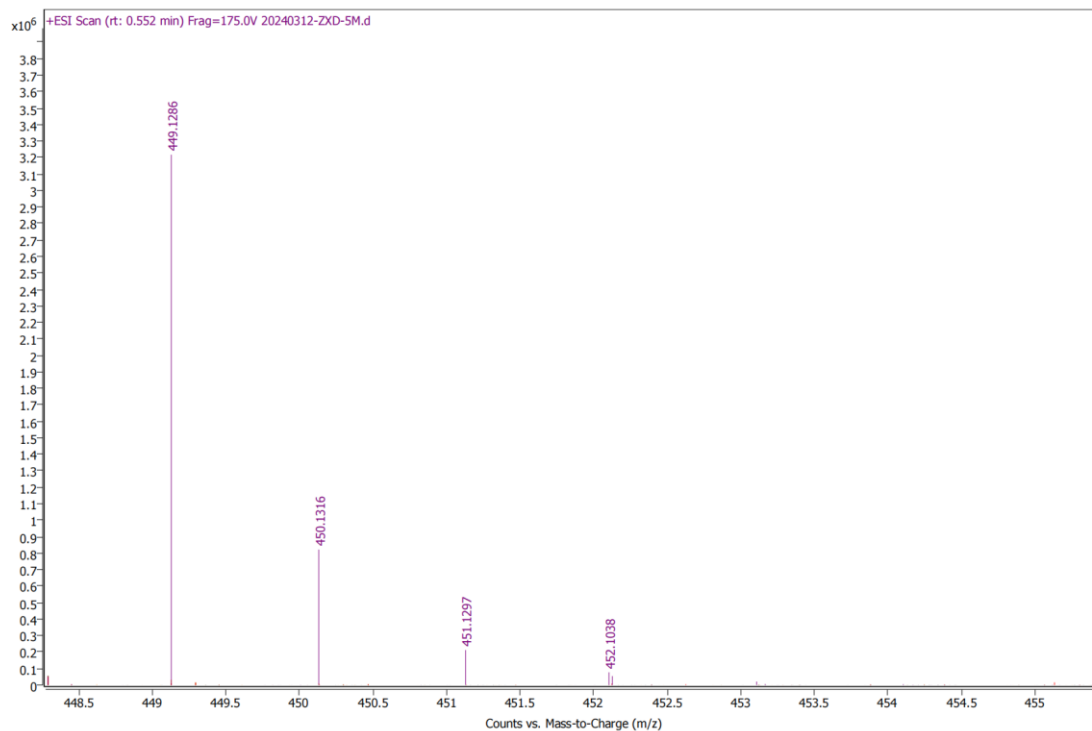

## Compound 10n [M + H]<sup>+</sup>

### Spectrum Plot Report

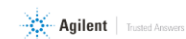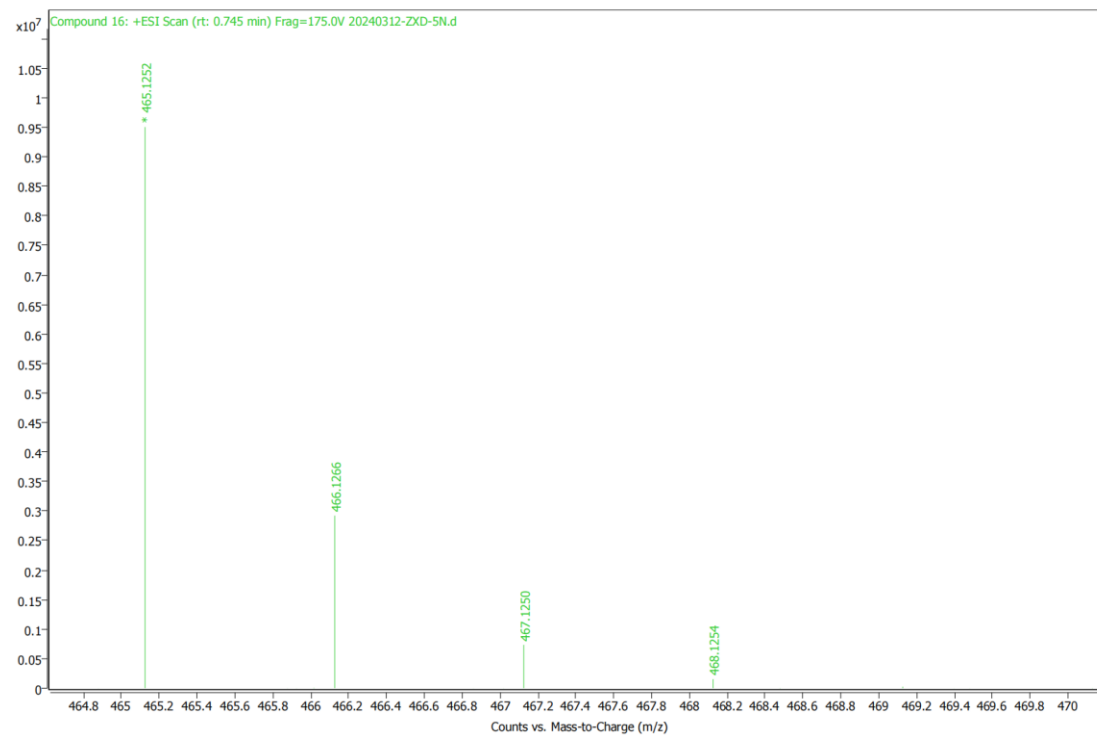

### Compound 11a [M + H]<sup>+</sup>

#### Spectrum Plot Report

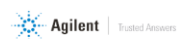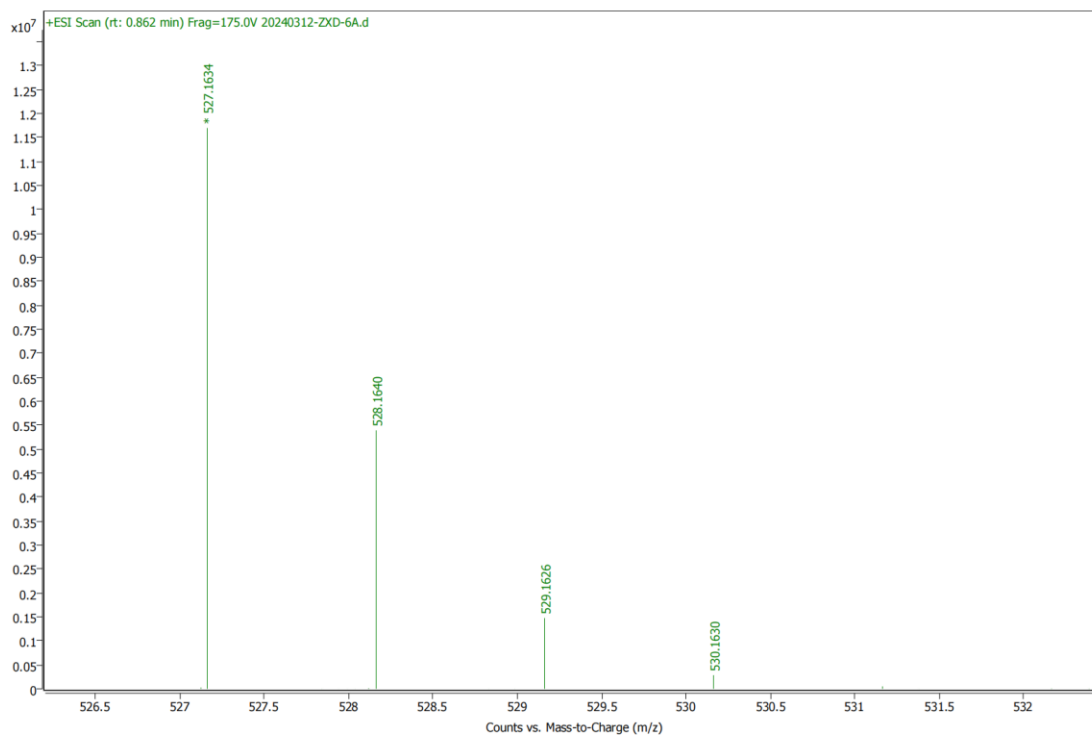

### Compound 11b [M + H]<sup>+</sup>

#### Spectrum Plot Report

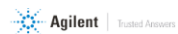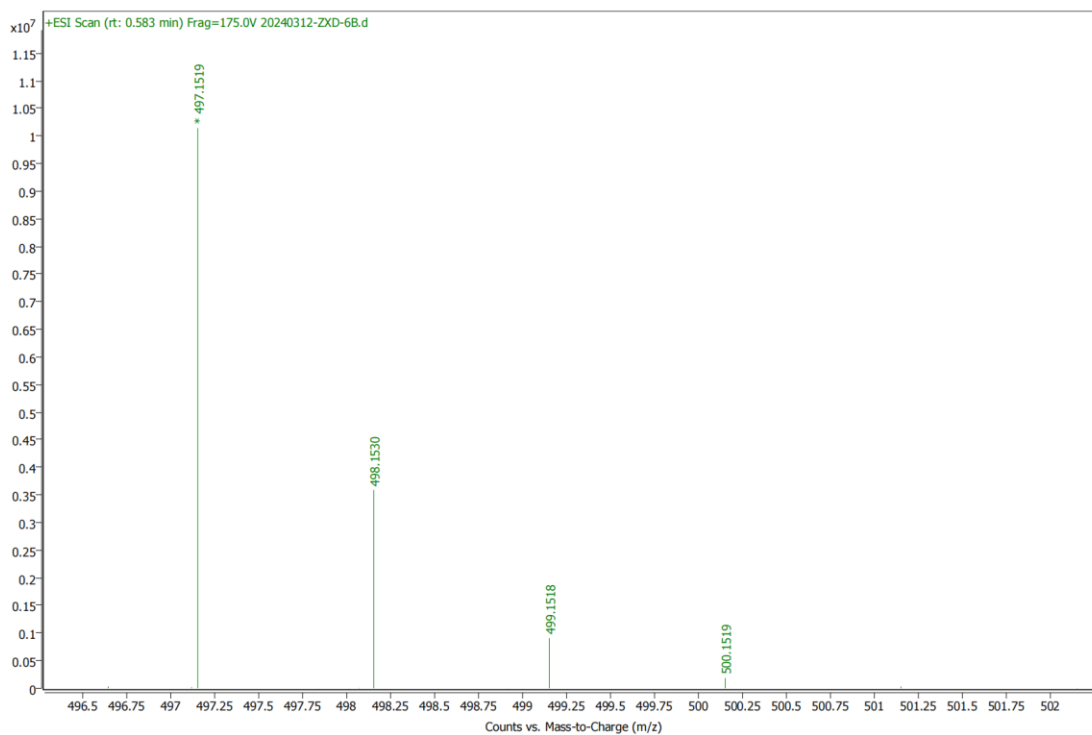

### Compound 11c [M + H]<sup>+</sup>

## Spectrum Plot Report

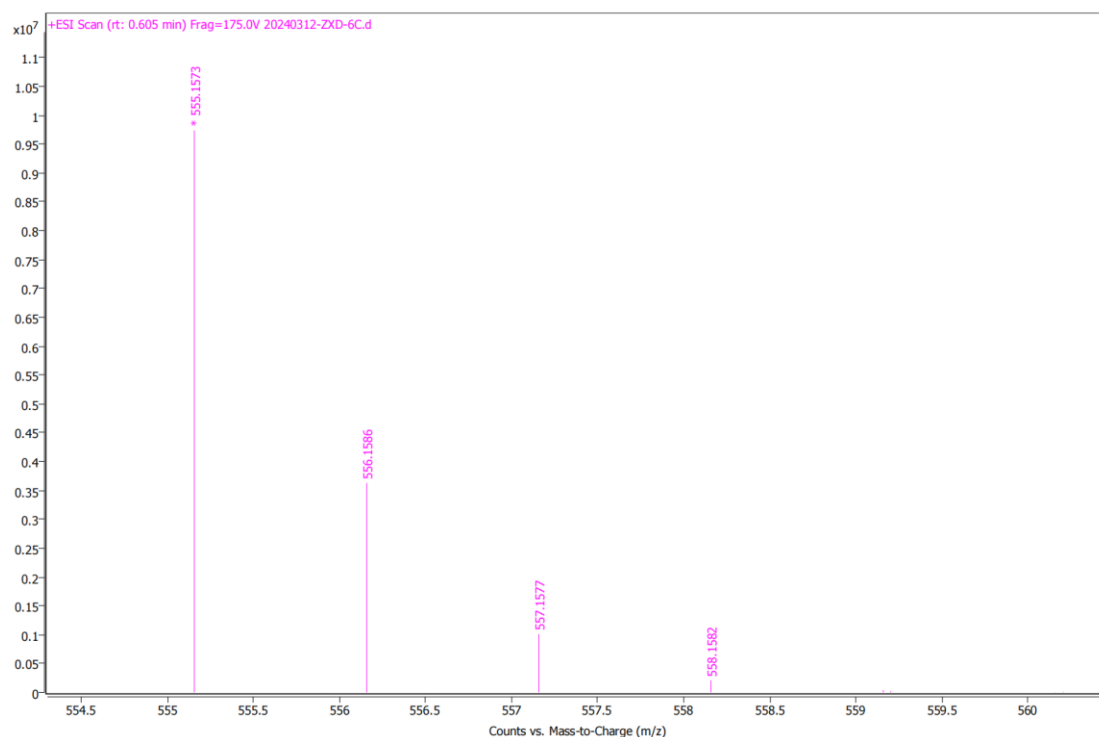

## Compound 11d [M + H]<sup>+</sup>

## Spectrum Plot Report

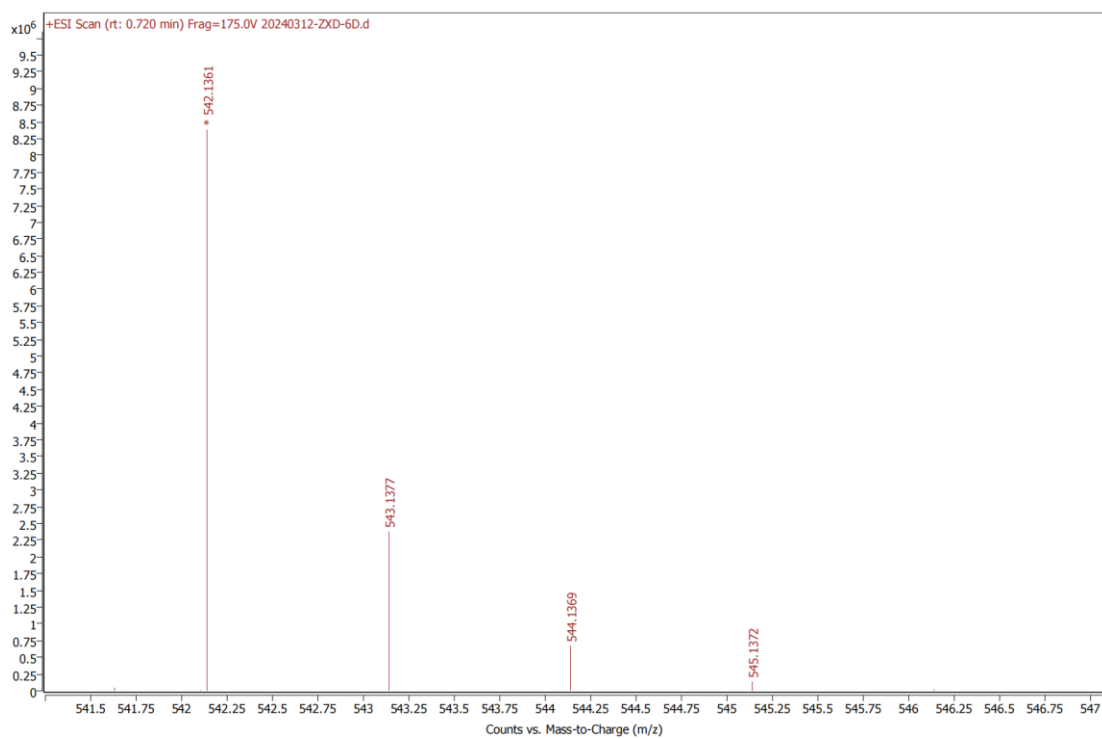

## Compound 11e [M + H]<sup>+</sup>

### Spectrum Plot Report

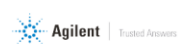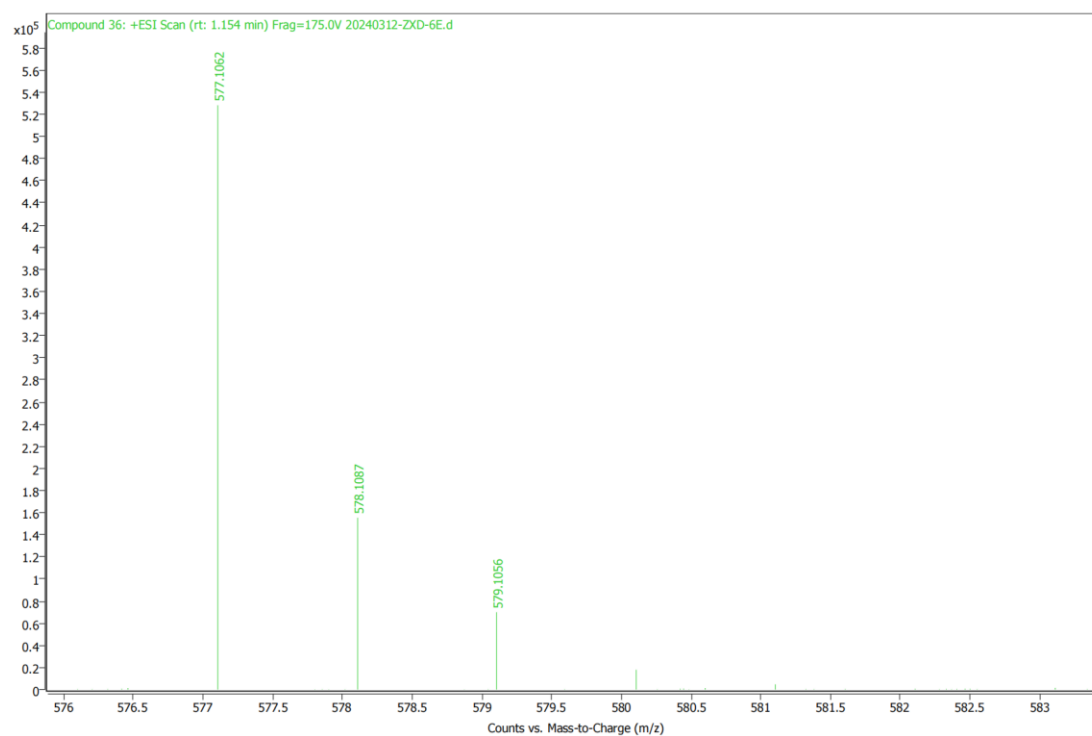

## Compound 11h [M + H]<sup>+</sup>

### Spectrum Plot Report

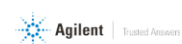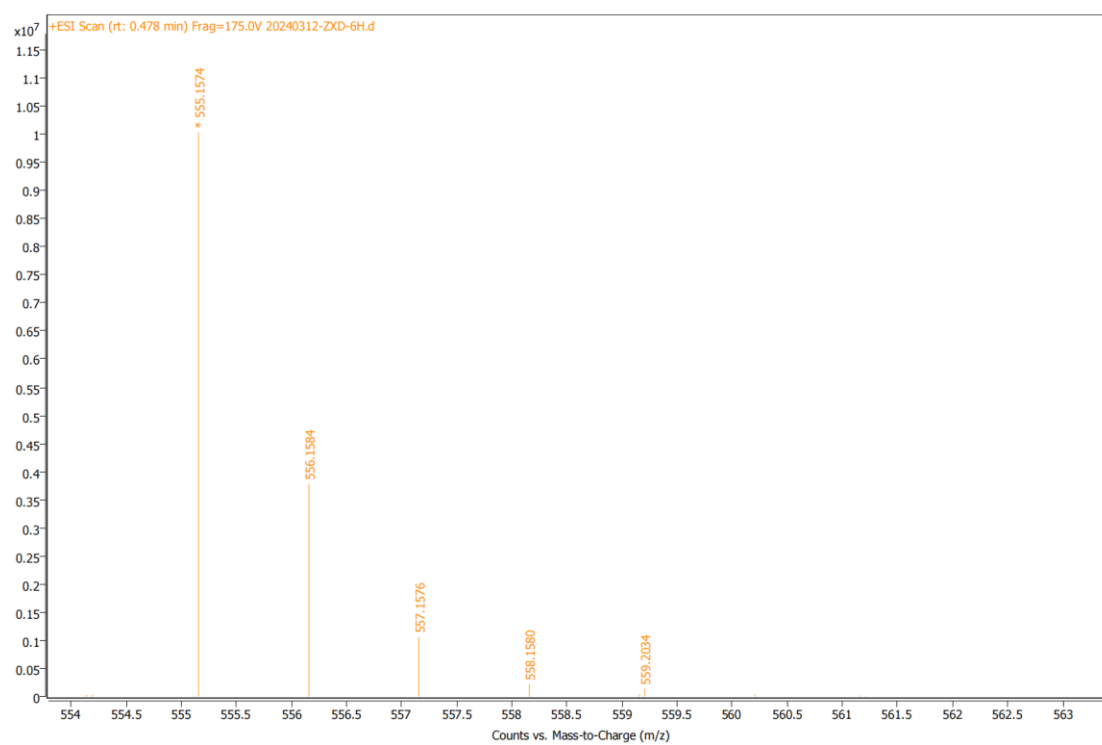

# Compound 11i [M + H]<sup>+</sup>

## Spectrum Plot Report

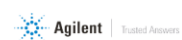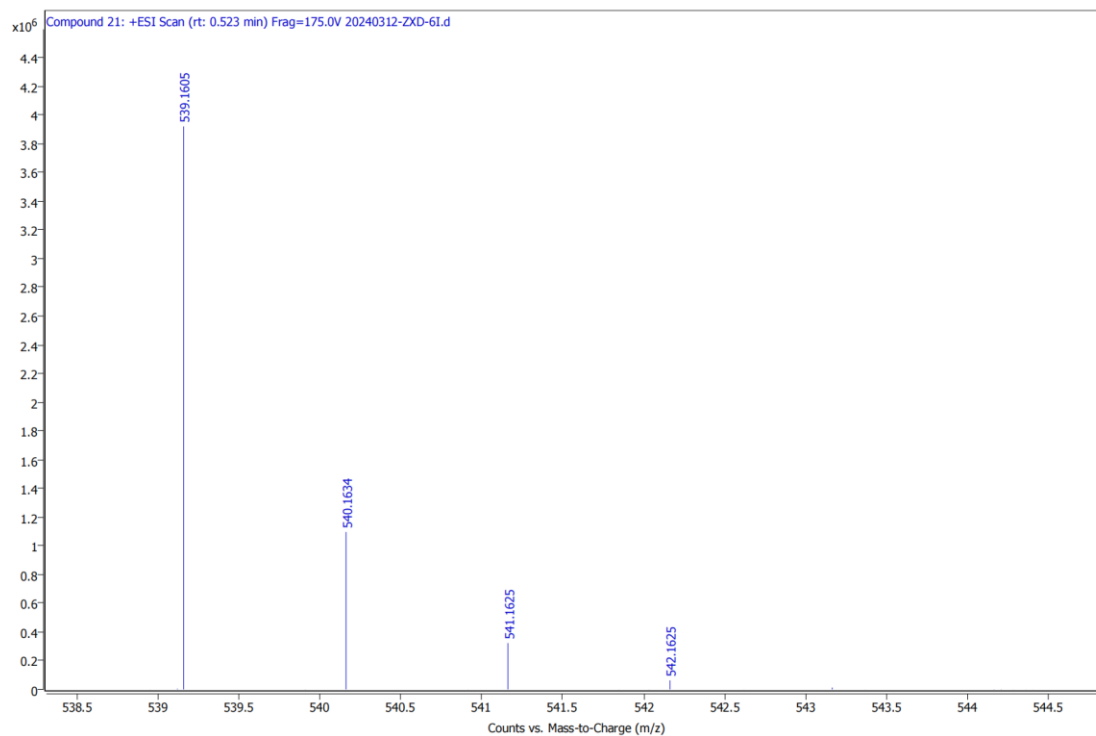

# Compound 11j [M + H]<sup>+</sup>

## Spectrum Plot Report

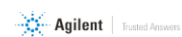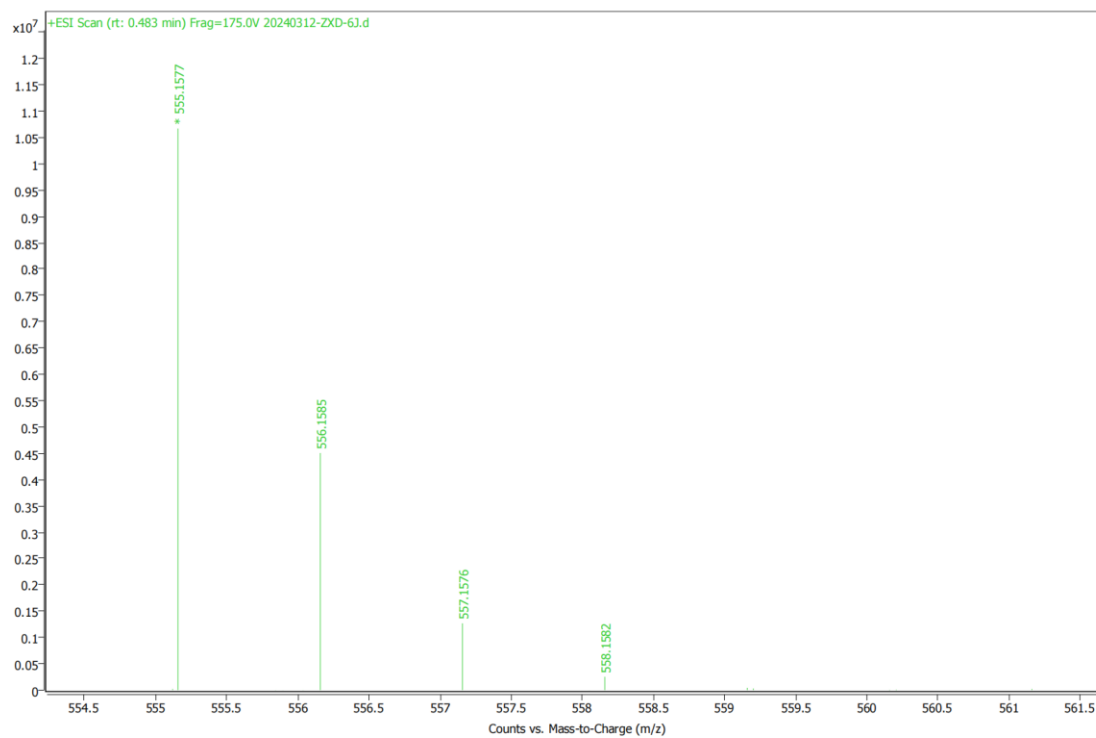

## Compound 11k [M + H]<sup>+</sup>

### Spectrum Plot Report

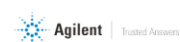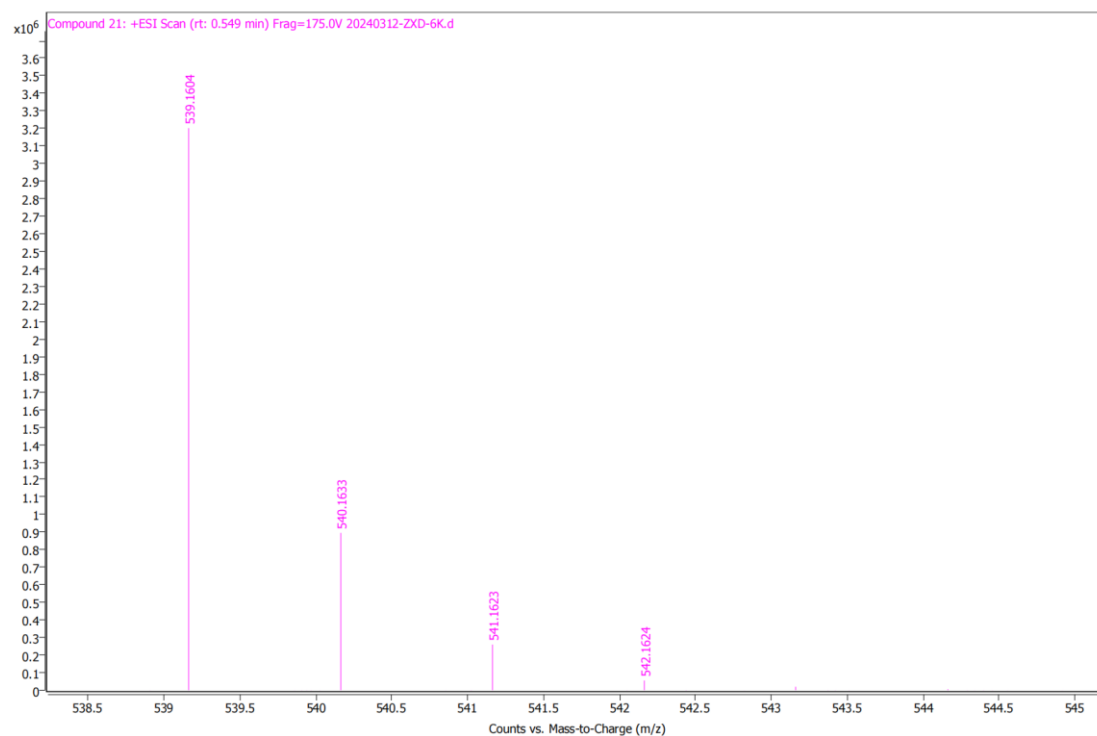

## Compound 12b [M + H]<sup>+</sup>

### Spectrum Plot Report

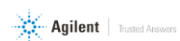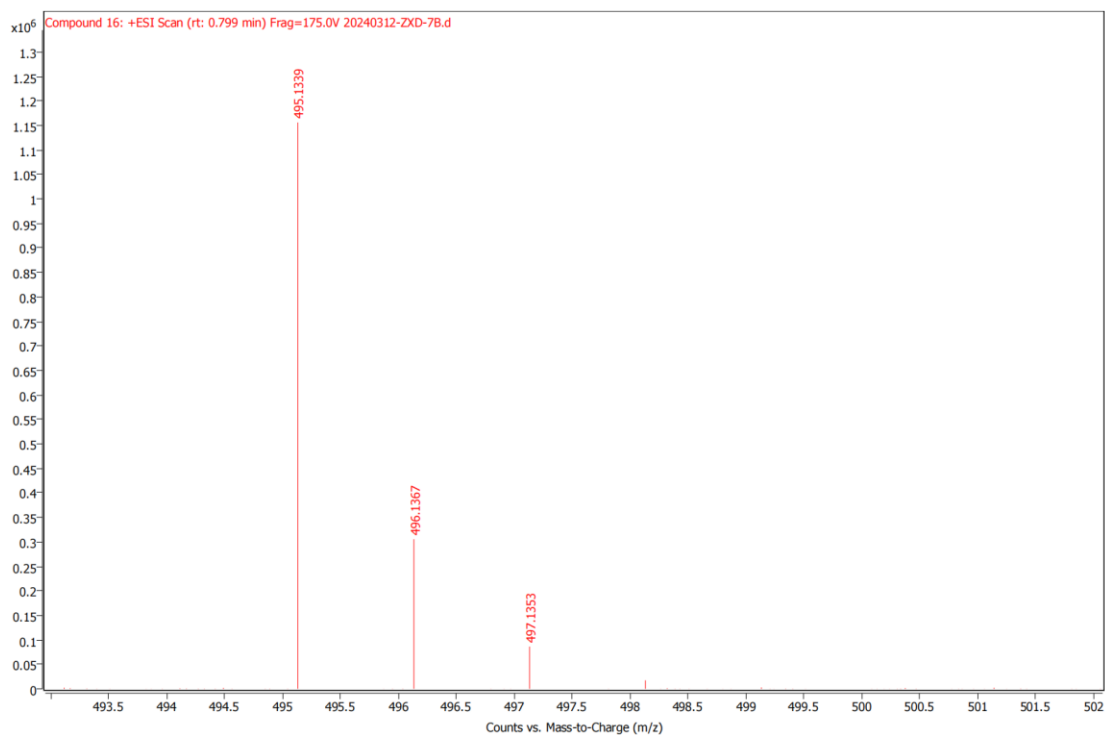

## Compound 12c [M + H]<sup>+</sup>

### Spectrum Plot Report

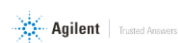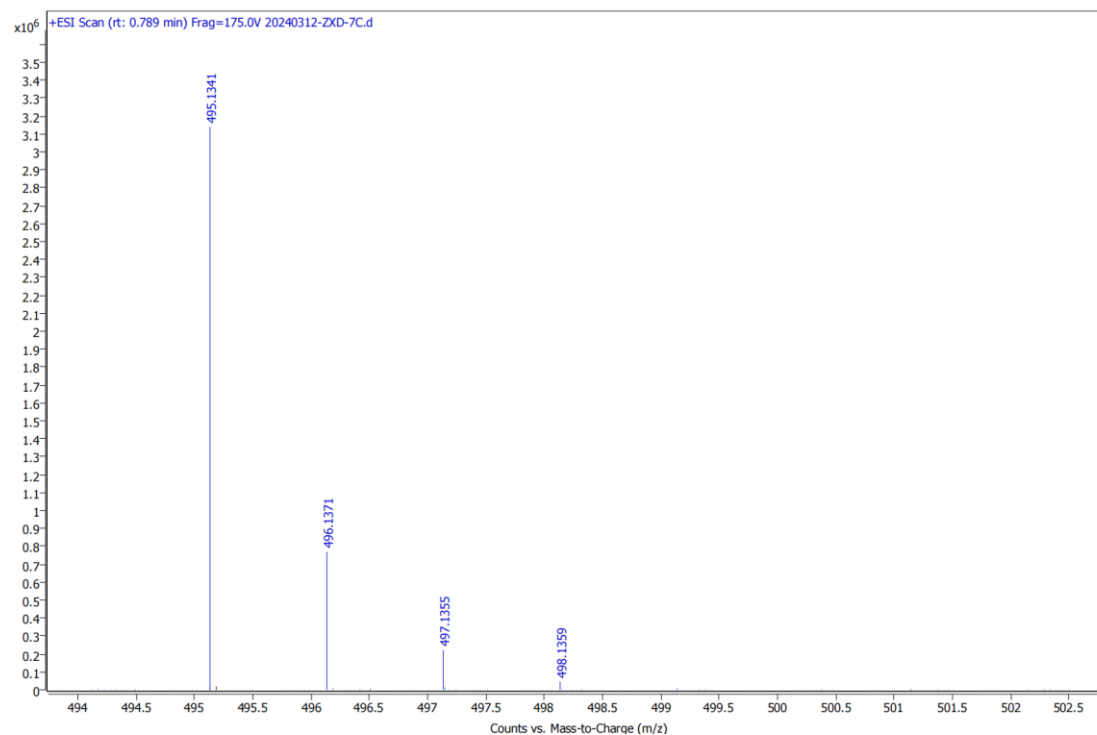

## Compound 12d [M + H]<sup>+</sup>

### Spectrum Plot Report

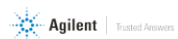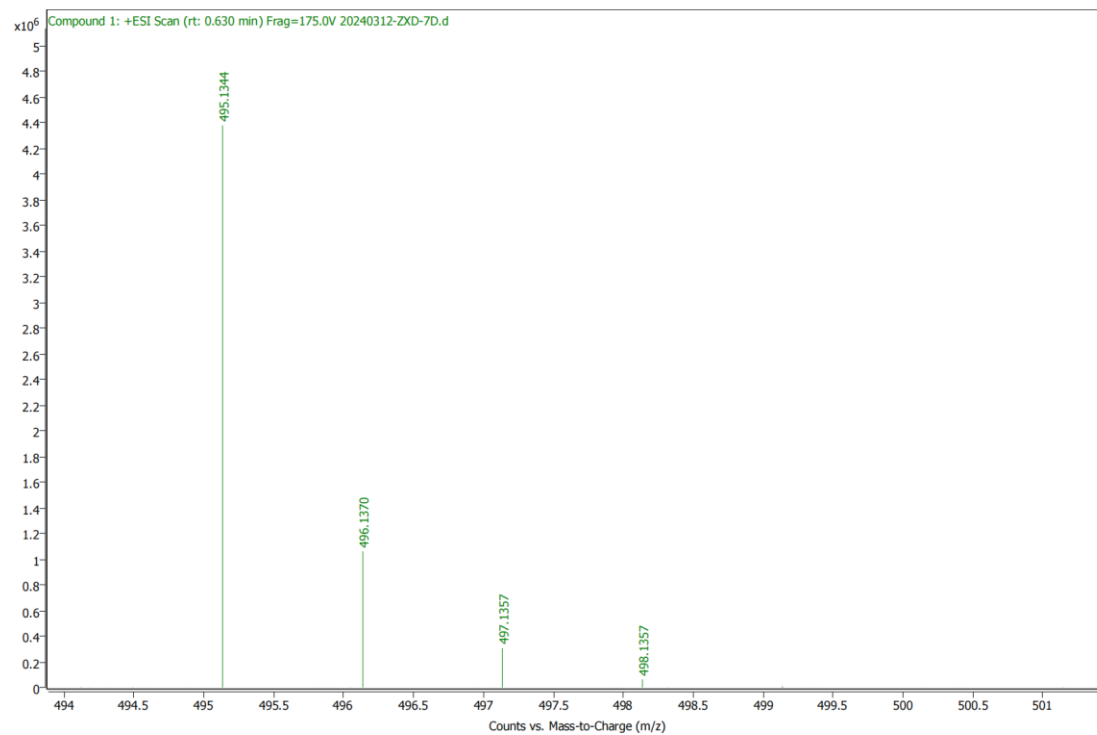

## Compound 12e [M + H]<sup>+</sup>

### Spectrum Plot Report

Agilent | Trusted Answers

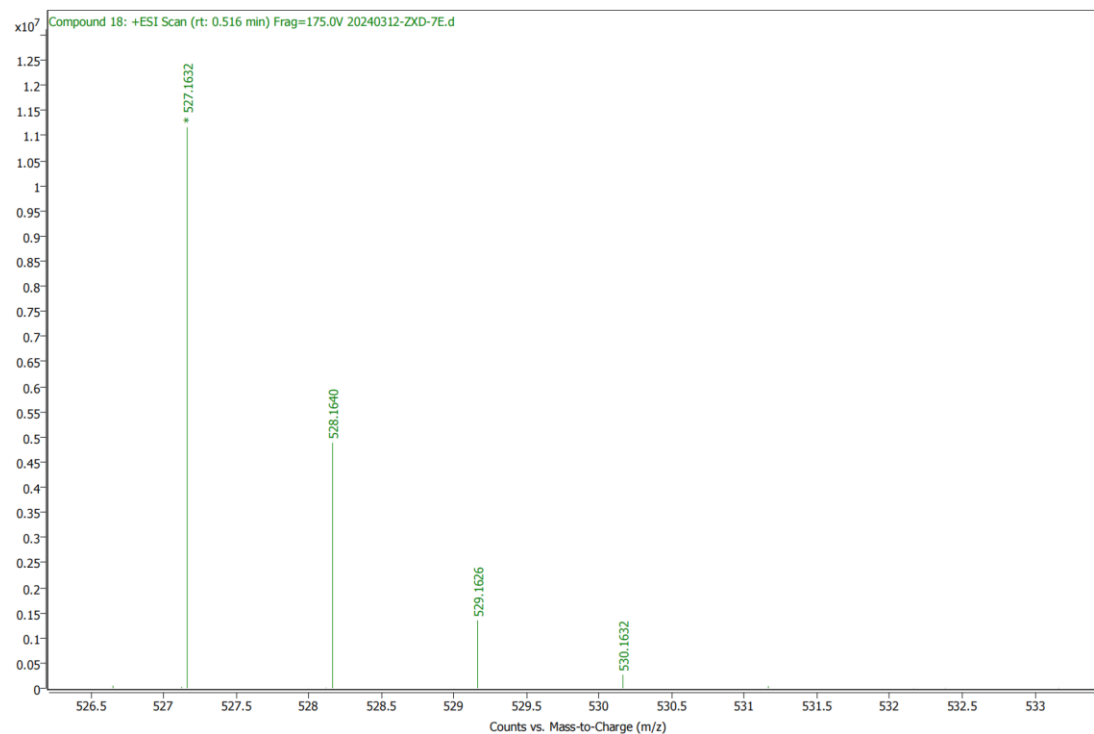

## Compound 12f [M + H]<sup>+</sup>

### Spectrum Plot Report

Agilent | Trusted Answers

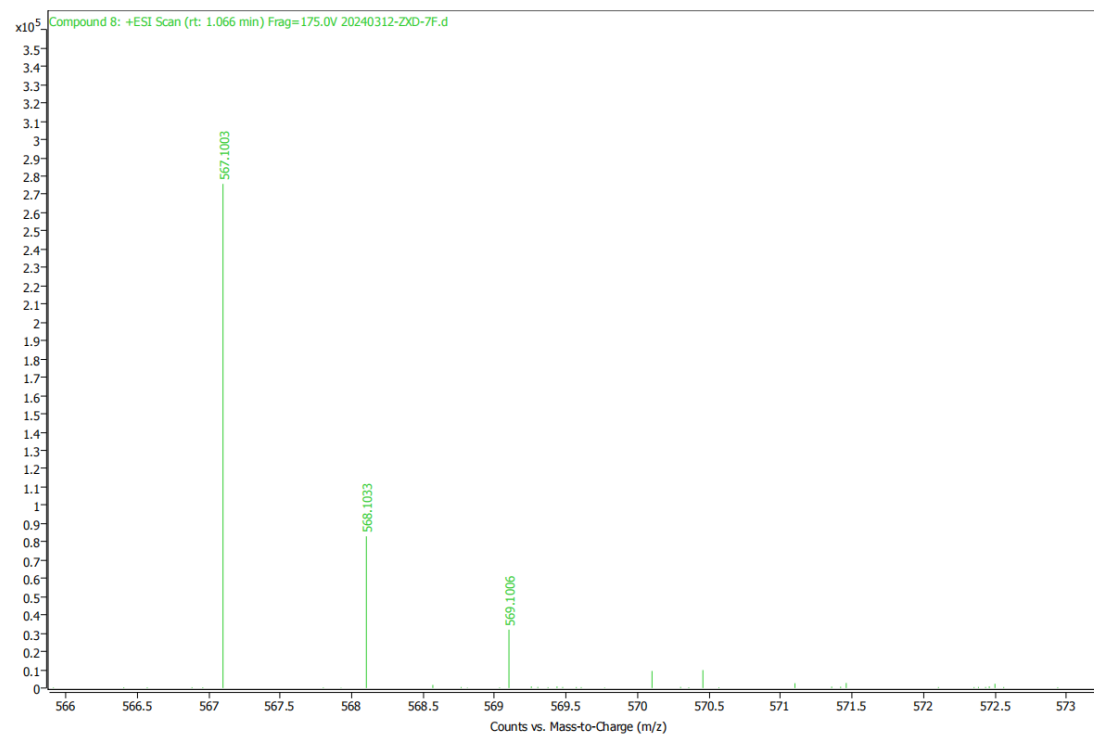

Compound 10a [M - H]<sup>-</sup>

Display Report

Analysis Info Acquisition Date 3/23/2024 9:49:29 AM

Sample Name 20240322-ZXD-5A  
Comment

| Acquisition Parameter |          |                      |          |                  |           |
|-----------------------|----------|----------------------|----------|------------------|-----------|
| Source Type           | ESI      | Ion Polarity         | Negative | Set Nebulizer    | 2.0 Bar   |
| Focus                 | Active   | Set Capillary        | 2800 V   | Set Dry Heater   | 200 °C    |
| Scan Begin            | 50 m/z   | Set End Plate Offset | -500 V   | Set Dry Gas      | 8.0 l/min |
| Scan End              | 1500 m/z | Set Charging Voltage | 2000 V   | Set Divert Valve | Waste     |
|                       |          | Set Corona           | 0 nA     | Set APCI Heater  | 0 °C      |

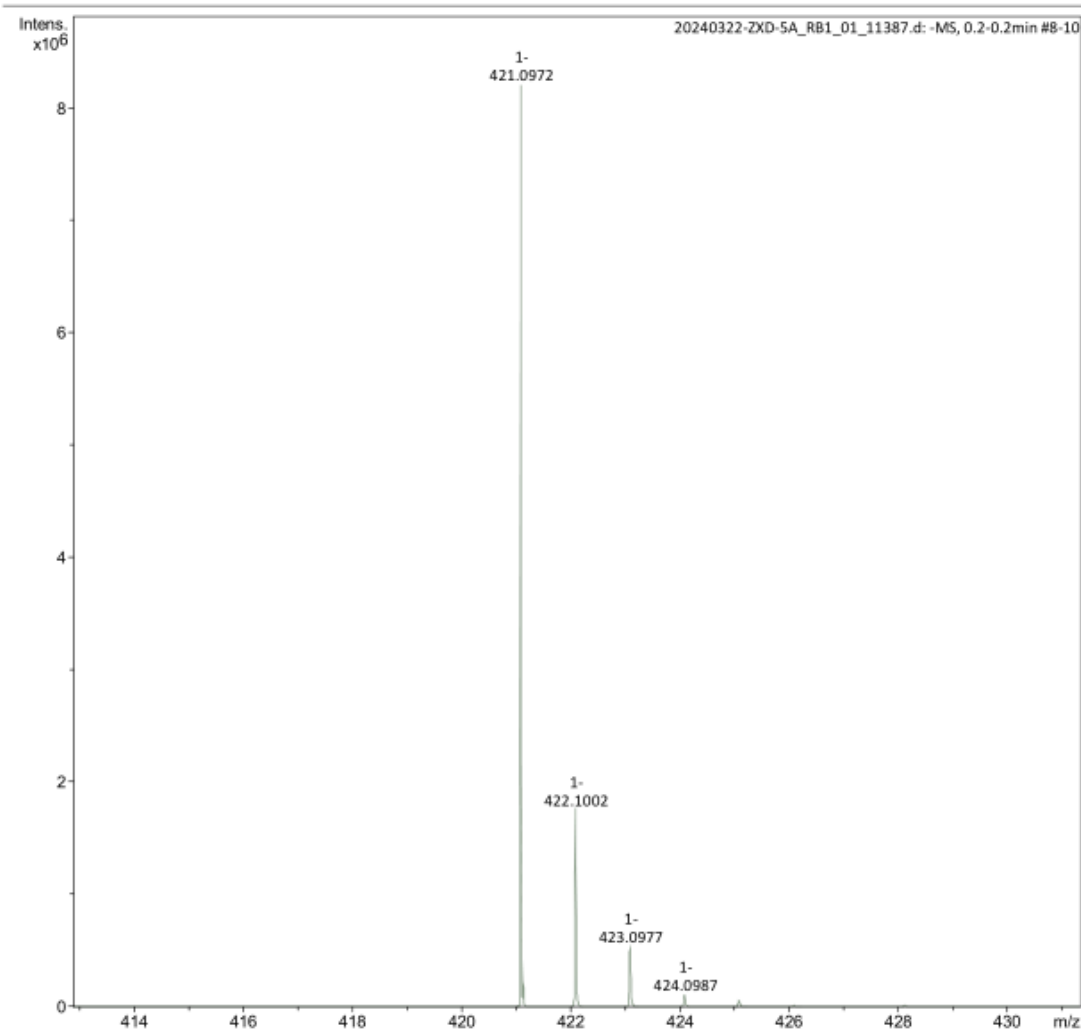

Compound 10f [M - H]<sup>-</sup>

Display Report

Analysis Info Acquisition Date 3/23/2024 9:55:01 AM

Sample Name 20240322-ZXD-5F  
Comment

| Acquisition Parameter |          |                      |          |                  |           |
|-----------------------|----------|----------------------|----------|------------------|-----------|
| Source Type           | ESI      | Ion Polarity         | Negative | Set Nebulizer    | 2.0 Bar   |
| Focus                 | Active   | Set Capillary        | 2800 V   | Set Dry Heater   | 200 °C    |
| Scan Begin            | 50 m/z   | Set End Plate Offset | -500 V   | Set Dry Gas      | 8.0 l/min |
| Scan End              | 1500 m/z | Set Charging Voltage | 2000 V   | Set Divert Valve | Waste     |
|                       |          | Set Corona           | 0 nA     | Set APCI Heater  | 0 °C      |

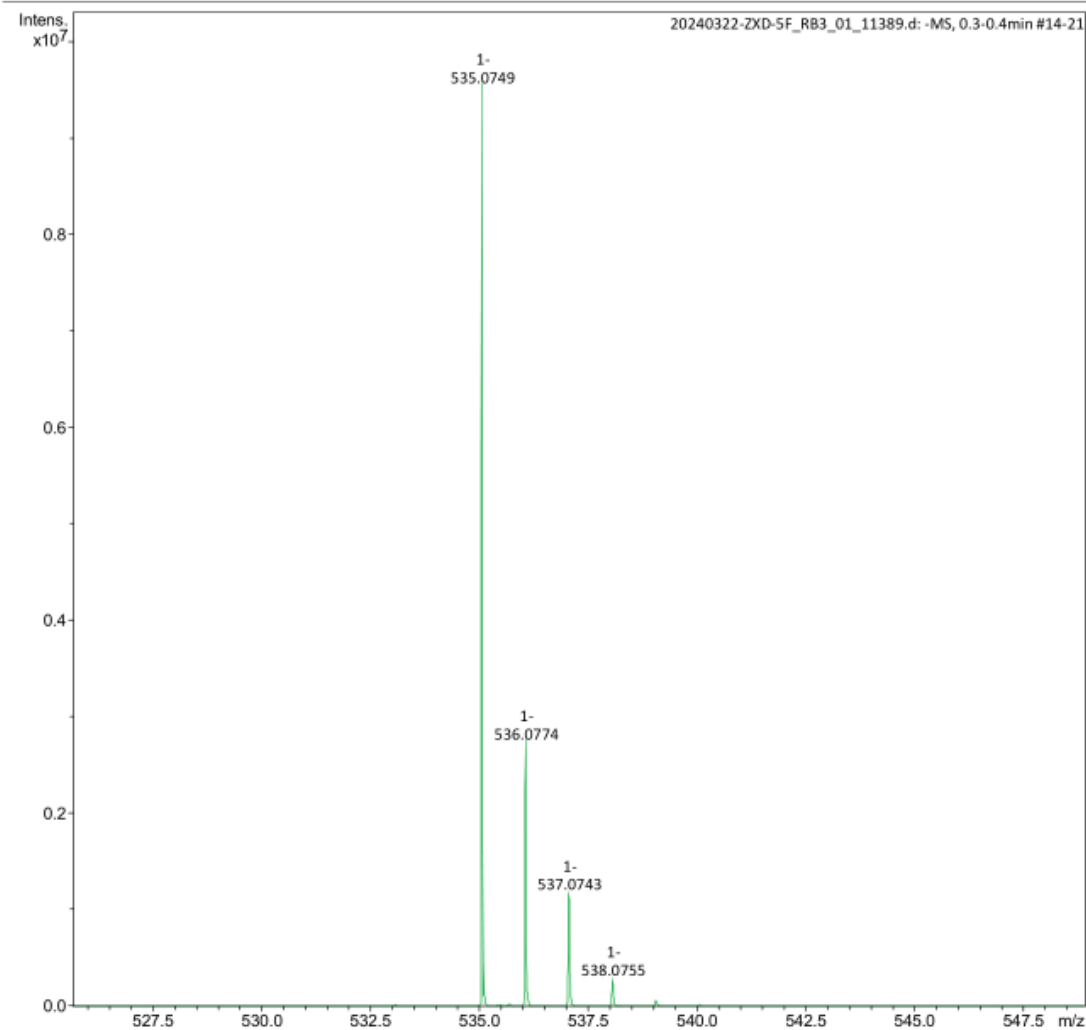

Compound 10g [M - H]<sup>-</sup>

Display Report

Analysis Info Acquisition Date 3/23/2024 9:57:45 AM

Sample Name 20240322-ZXD-5G  
Comment

| Acquisition Parameter |          |                      |          |                  |           |
|-----------------------|----------|----------------------|----------|------------------|-----------|
| Source Type           | ESI      | Ion Polarity         | Negative | Set Nebulizer    | 2.0 Bar   |
| Focus                 | Active   | Set Capillary        | 2800 V   | Set Dry Heater   | 200 °C    |
| Scan Begin            | 50 m/z   | Set End Plate Offset | -500 V   | Set Dry Gas      | 8.0 l/min |
| Scan End              | 1500 m/z | Set Charging Voltage | 2000 V   | Set Divert Valve | Waste     |
|                       |          | Set Corona           | 0 nA     | Set APCI Heater  | 0 °C      |

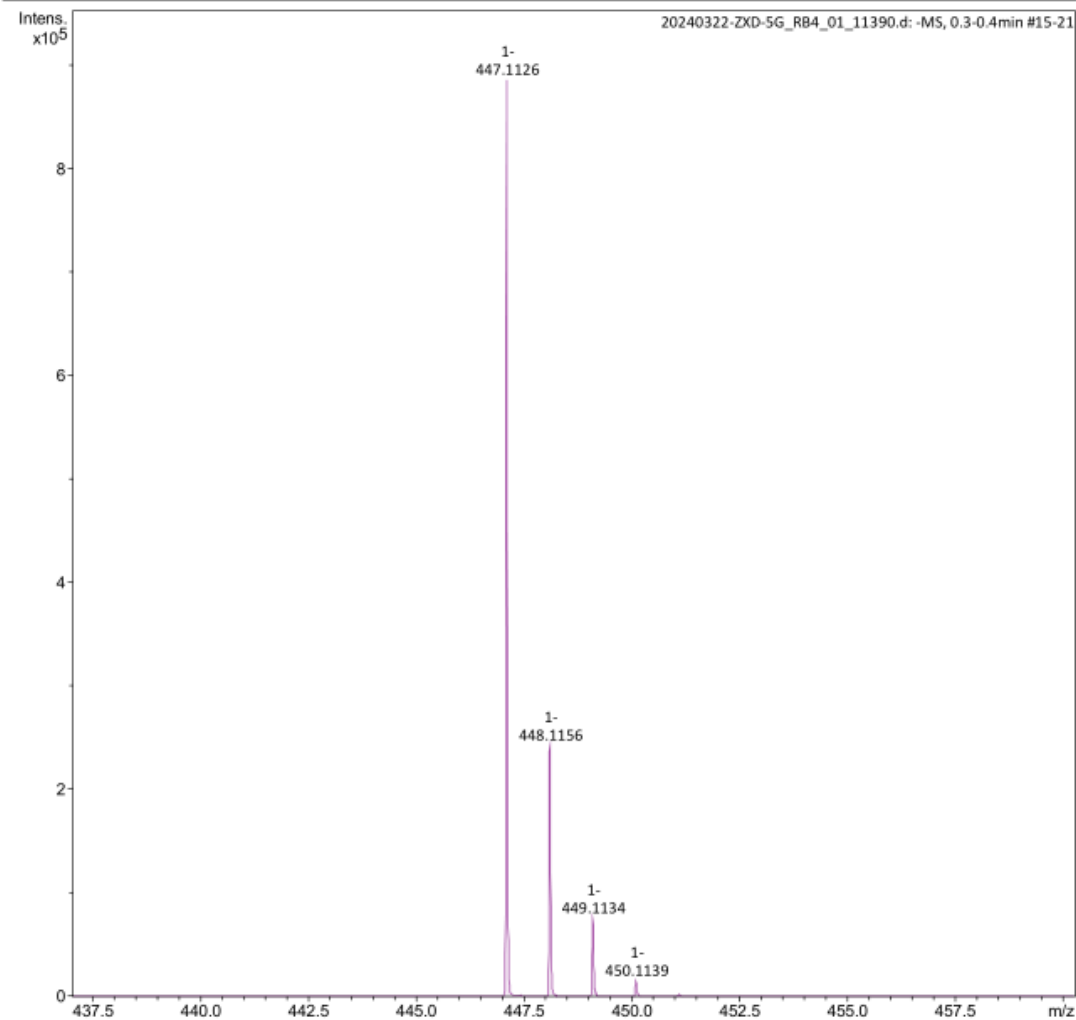

Compound 10j [M - H]<sup>-</sup>

Display Report

| Analysis Info         |                 | Acquisition Date 3/23/2024 10:00:31 AM |          |                  |           |
|-----------------------|-----------------|----------------------------------------|----------|------------------|-----------|
| Sample Name           | 20240322-ZXD-5J |                                        |          |                  |           |
| Comment               |                 |                                        |          |                  |           |
| Acquisition Parameter |                 |                                        |          |                  |           |
| Source Type           | ESI             | Ion Polarity                           | Negative | Set Nebulizer    | 2.0 Bar   |
| Focus                 | Active          | Set Capillary                          | 2800 V   | Set Dry Heater   | 200 °C    |
| Scan Begin            | 50 m/z          | Set End Plate Offset                   | -500 V   | Set Dry Gas      | 8.0 l/min |
| Scan End              | 1500 m/z        | Set Charging Voltage                   | 2000 V   | Set Divert Valve | Waste     |
|                       |                 | Set Corona                             | 0 nA     | Set APCI Heater  | 0 °C      |

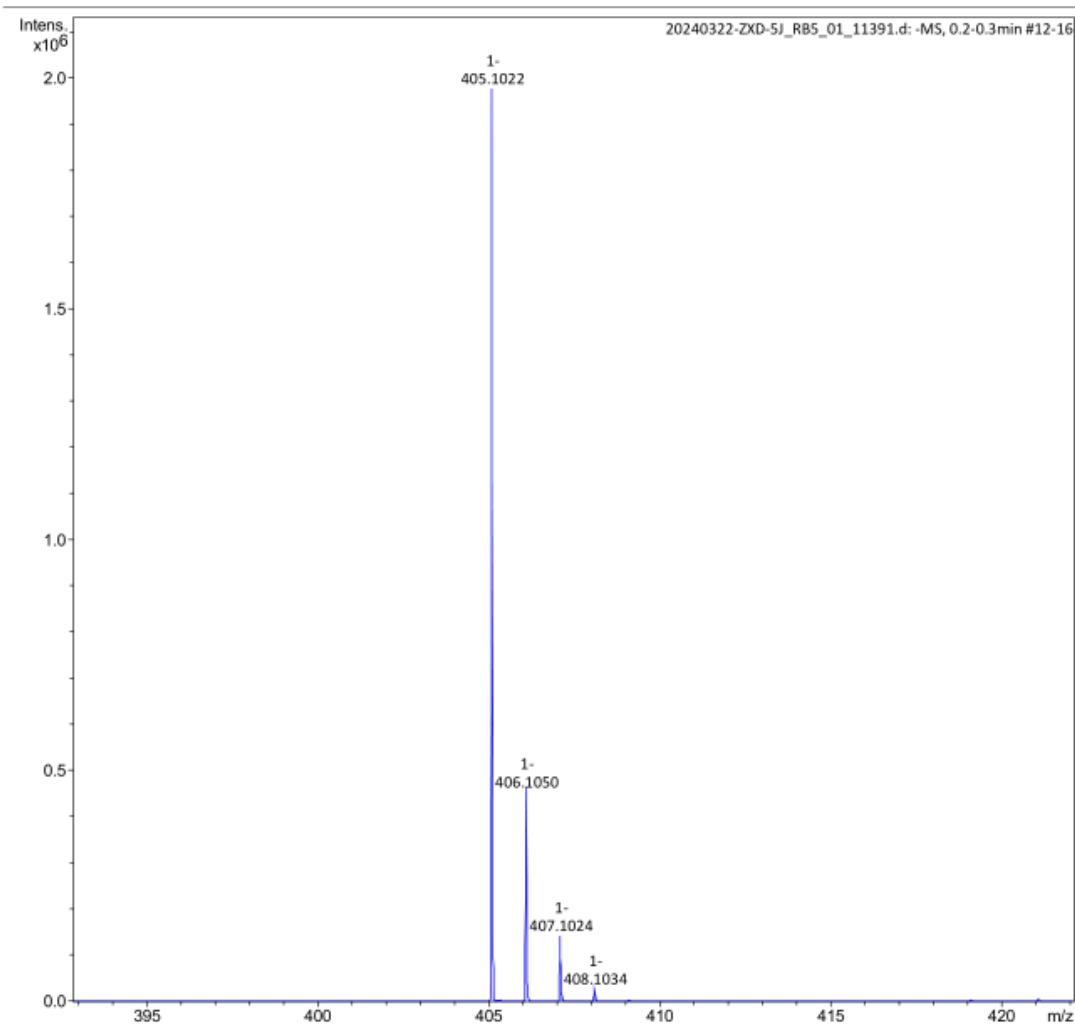

Compound 10k [M - H]<sup>-</sup>

Display Report

Analysis Info Acquisition Date 3/23/2024 10:03:18 AM

Sample Name 20240322-ZXD-5K  
Comment

| Acquisition Parameter |          |                      |          |                  |           |
|-----------------------|----------|----------------------|----------|------------------|-----------|
| Source Type           | ESI      | Ion Polarity         | Negative | Set Nebulizer    | 2.0 Bar   |
| Focus                 | Active   | Set Capillary        | 2800 V   | Set Dry Heater   | 200 °C    |
| Scan Begin            | 50 m/z   | Set End Plate Offset | -500 V   | Set Dry Gas      | 8.0 l/min |
| Scan End              | 1500 m/z | Set Charging Voltage | 2000 V   | Set Divert Valve | Waste     |
|                       |          | Set Corona           | 0 nA     | Set APCI Heater  | 0 °C      |

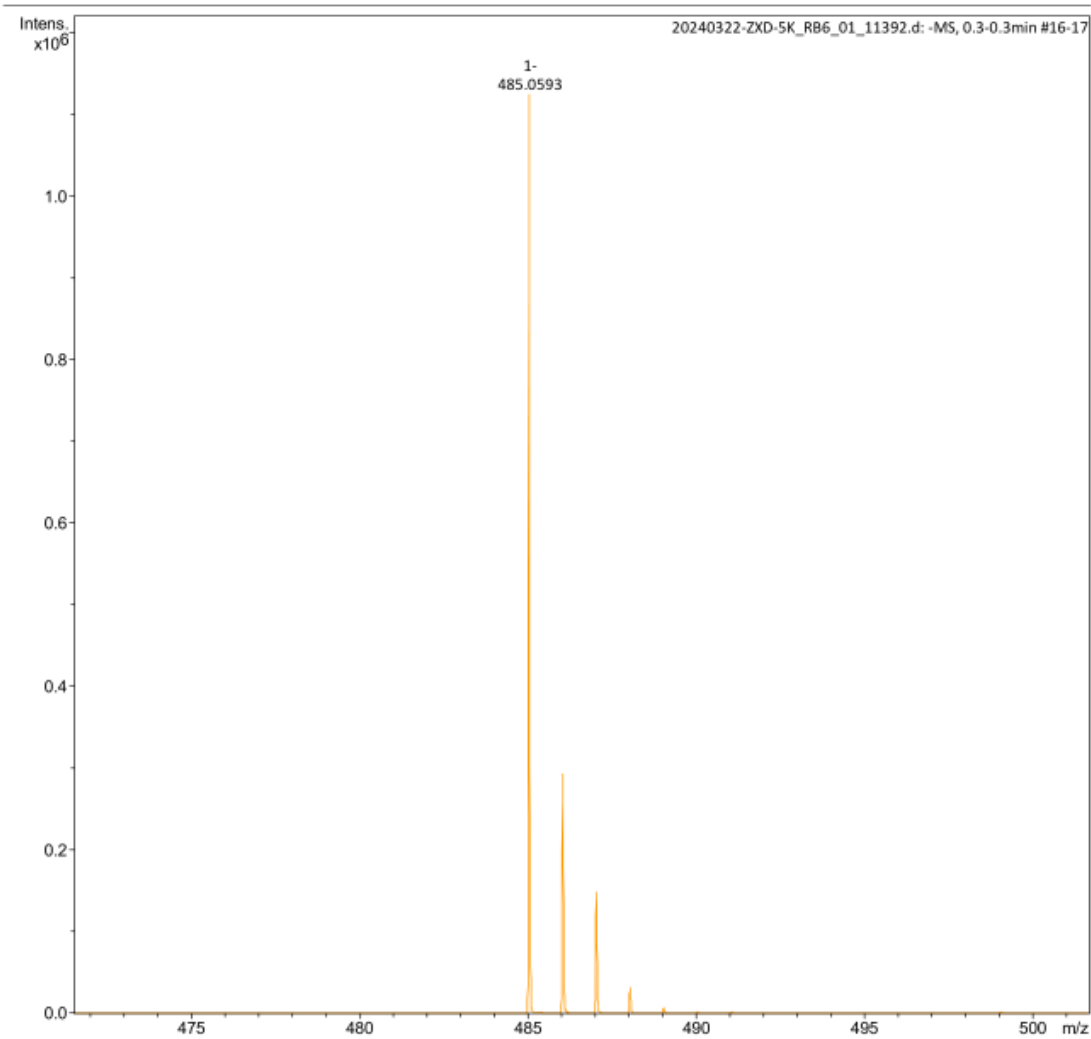

Compound 10l [M - H]<sup>-</sup>

Display Report

Analysis Info

Acquisition Date 3/23/2024 10:06:03 AM

Sample Name 20240322-ZXD-5L  
Comment

Acquisition Parameter

|             |          |                      |          |                  |           |
|-------------|----------|----------------------|----------|------------------|-----------|
| Source Type | ESI      | Ion Polarity         | Negative | Set Nebulizer    | 2.0 Bar   |
| Focus       | Active   | Set Capillary        | 2800 V   | Set Dry Heater   | 200 °C    |
| Scan Begin  | 50 m/z   | Set End Plate Offset | -500 V   | Set Dry Gas      | 8.0 l/min |
| Scan End    | 1500 m/z | Set Charging Voltage | 2000 V   | Set Divert Valve | Waste     |
|             |          | Set Corona           | 0 nA     | Set APCI Heater  | 0 °C      |

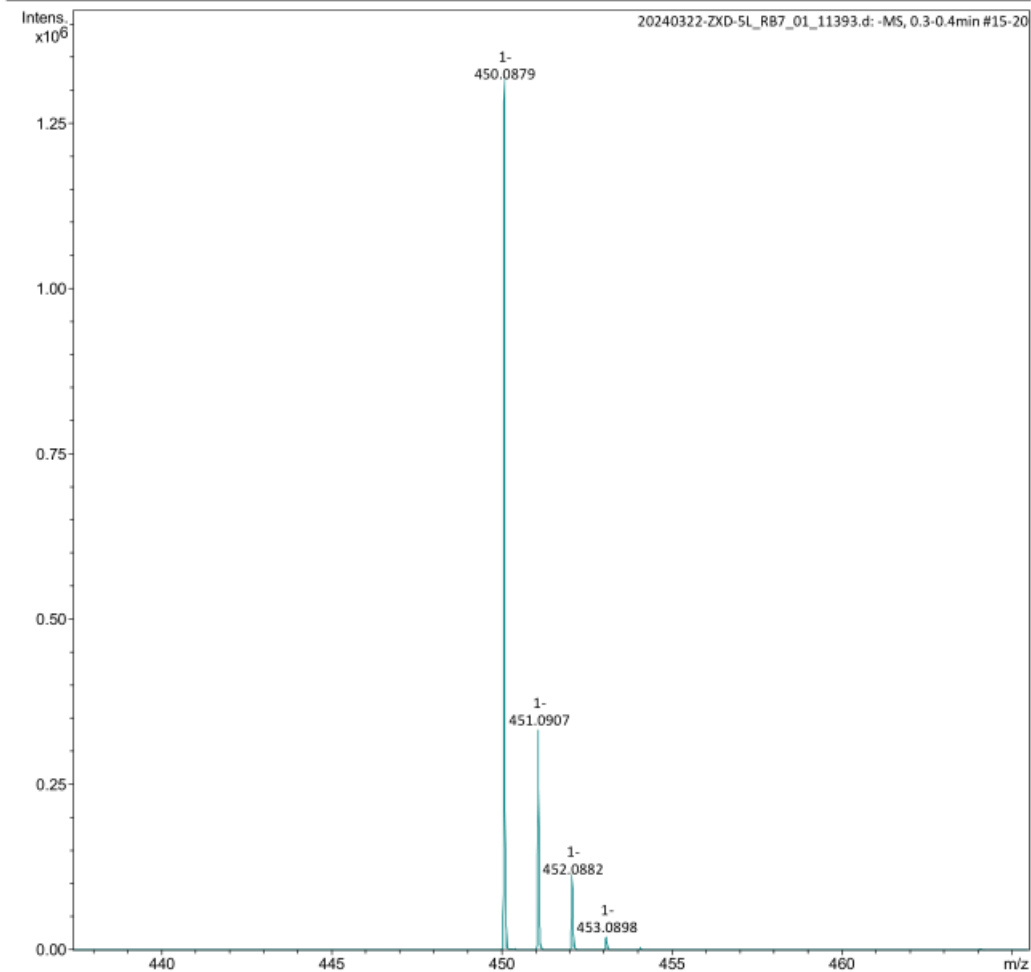

Compound 11f [M - H]<sup>-</sup>

Display Report

Analysis Info Acquisition Date 3/23/2024 10:08:49 AM

Sample Name 20240322-ZXD-6F  
Comment

| Acquisition Parameter |          |                      |          |                  |           |
|-----------------------|----------|----------------------|----------|------------------|-----------|
| Source Type           | ESI      | Ion Polarity         | Negative | Set Nebulizer    | 2.0 Bar   |
| Focus                 | Active   | Set Capillary        | 2800 V   | Set Dry Heater   | 200 °C    |
| Scan Begin            | 50 m/z   | Set End Plate Offset | -500 V   | Set Dry Gas      | 8.0 l/min |
| Scan End              | 1500 m/z | Set Charging Voltage | 2000 V   | Set Divert Valve | Waste     |
|                       |          | Set Corona           | 0 nA     | Set APCI Heater  | 0 °C      |

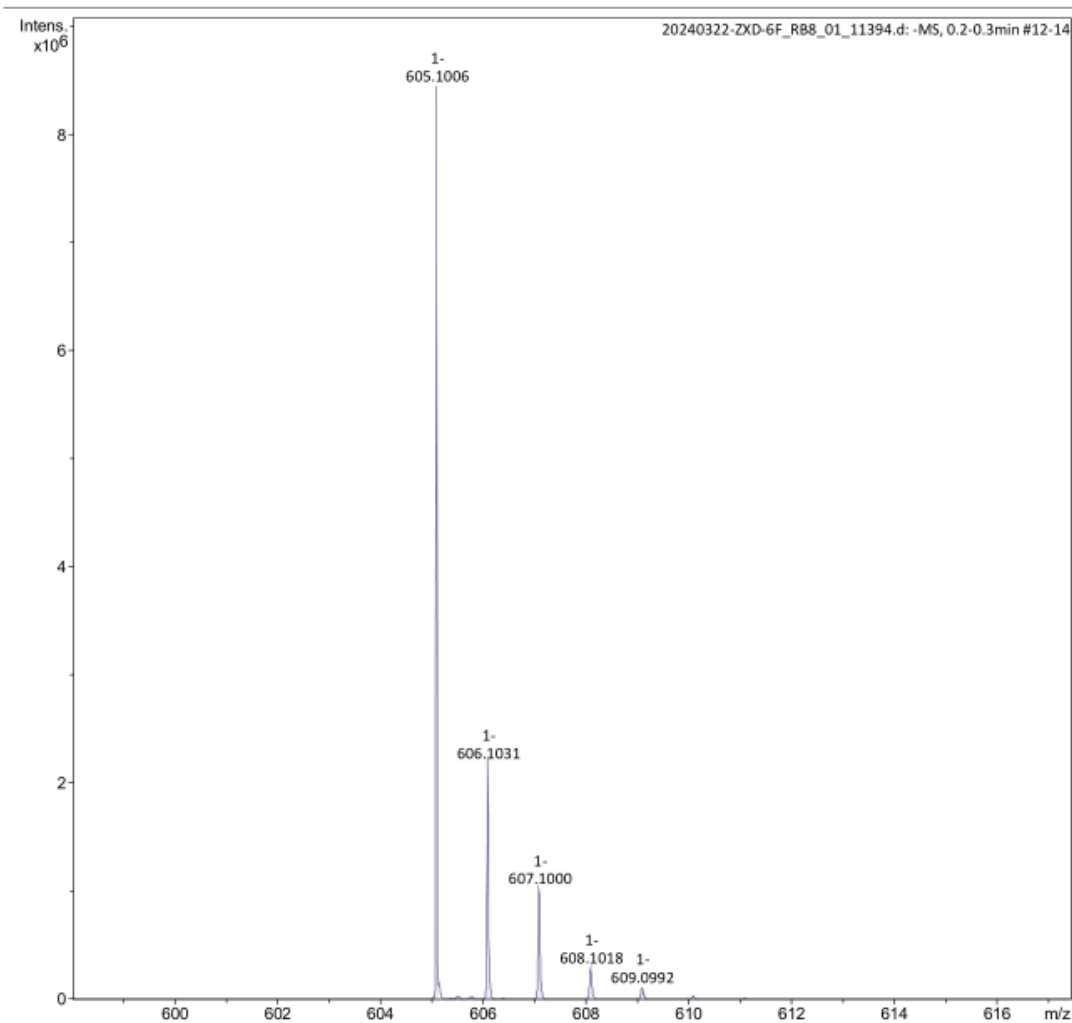

Compound 11g [M - H]<sup>-</sup>

Display Report

|                             |          |                                        |          |                  |           |
|-----------------------------|----------|----------------------------------------|----------|------------------|-----------|
| Analysis Info               |          | Acquisition Date 3/23/2024 10:11:35 AM |          |                  |           |
| Sample Name 20240322-ZXD-6G |          |                                        |          |                  |           |
| Comment                     |          |                                        |          |                  |           |
| Acquisition Parameter       |          |                                        |          |                  |           |
| Source Type                 | ESI      | Ion Polarity                           | Negative | Set Nebulizer    | 2.0 Bar   |
| Focus                       | Active   | Set Capillary                          | 2800 V   | Set Dry Heater   | 200 °C    |
| Scan Begin                  | 50 m/z   | Set End Plate Offset                   | -500 V   | Set Dry Gas      | 8.0 l/min |
| Scan End                    | 1500 m/z | Set Charging Voltage                   | 2000 V   | Set Divert Valve | Waste     |
|                             |          | Set Corona                             | 0 nA     | Set APCI Heater  | 0 °C      |

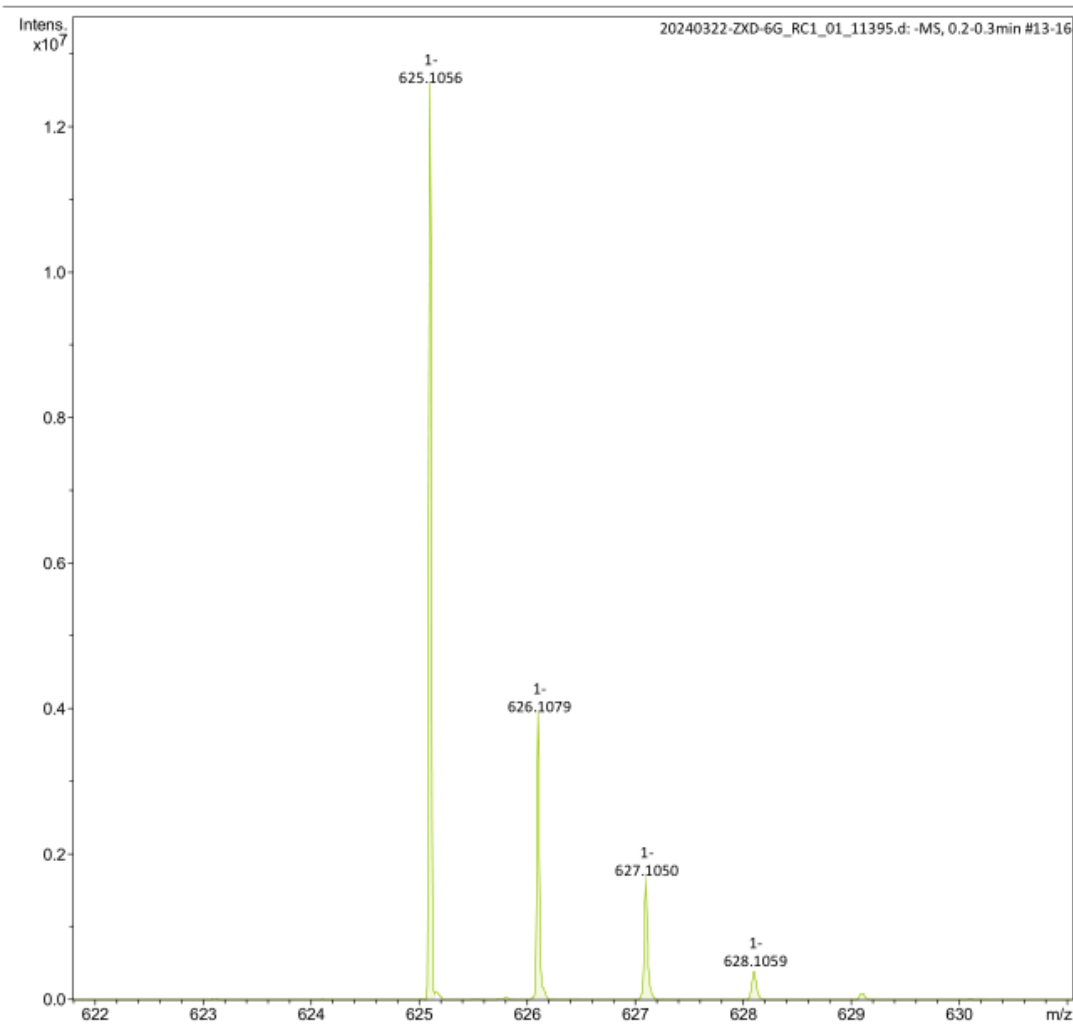

Compound 12a [M - H]<sup>-</sup>

Display Report

Analysis Info Acquisition Date 3/23/2024 10:14:20 AM

Sample Name 20240322-ZXD-12A  
Comment

Acquisition Parameter

|             |          |                      |          |                  |           |
|-------------|----------|----------------------|----------|------------------|-----------|
| Source Type | ESI      | Ion Polarity         | Negative | Set Nebulizer    | 2.0 Bar   |
| Focus       | Active   | Set Capillary        | 2800 V   | Set Dry Heater   | 200 °C    |
| Scan Begin  | 50 m/z   | Set End Plate Offset | -500 V   | Set Dry Gas      | 8.0 l/min |
| Scan End    | 1500 m/z | Set Charging Voltage | 2000 V   | Set Divert Valve | Waste     |
|             |          | Set Corona           | 0 nA     | Set APCI Heater  | 0 °C      |

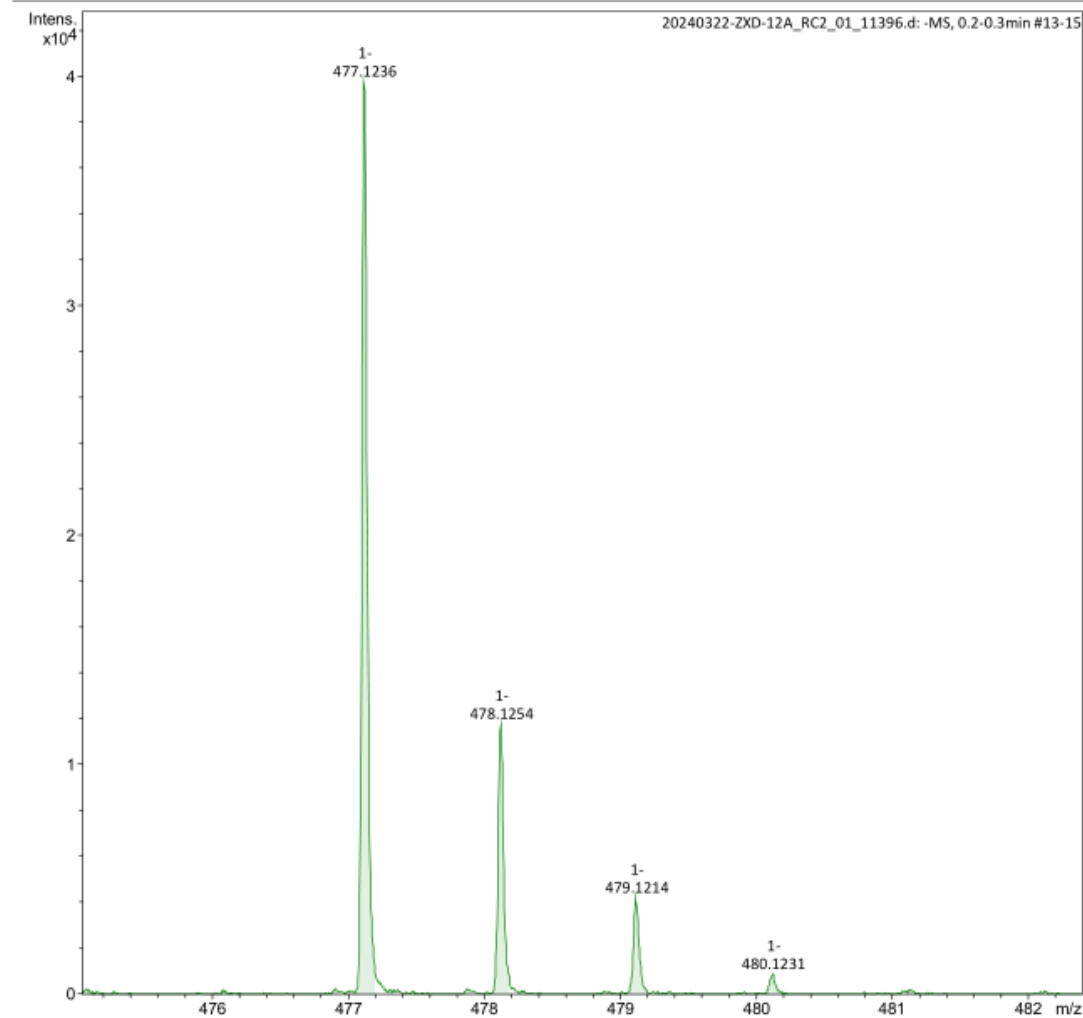

# HPLC

## Compound 10a

Acq. Operator : BY  
Acq. Instrument : 1260R  
Injection Date : 4/11/2024 10:09:00 PM  
Seq. Line : 1  
Location : 2  
Inj : 1  
Inj Volume : 20.000 µl  
Acq. Method : D:\Data\ZXD\DATA\20240411-ZXD-1\zxd-1F\_LC 2024-04-11 22-07-34\20240316--ZK-15MIN-35-95ACN.M  
Last changed : 3/16/2024 8:20:27 PM by BY  
Analysis Method : D:\DATA\KUN\METHOD\20240204-ZK-15MIN-25-90ACN.M  
Last changed : 4/11/2024 11:02:36 PM by BY  
(modified after loading)  
Method Info : 90% H2O and 10% ACE

Additional Info : Peak(s) manually integrated

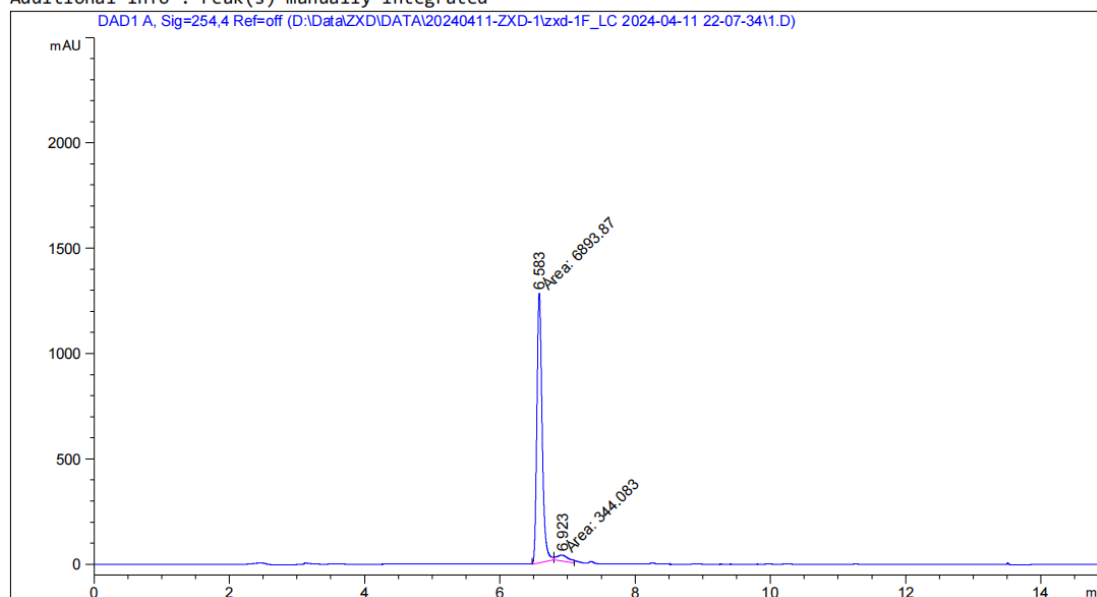

### Area Percent Report

Sorted By : Signal  
Multiplier : 1.0000  
Dilution : 1.0000  
Do not use Multiplier & Dilution Factor with ISTDs

Signal 1: DAD1 A, Sig=254,4 Ref=off

| Peak # | RetTime [min] | Type | Width [min] | Area [mAU*s] | Height [mAU] | Area %  |
|--------|---------------|------|-------------|--------------|--------------|---------|
| 1      | 6.583         | MM   | 0.0898      | 6893.86963   | 1279.50305   | 95.2461 |
| 2      | 6.923         | MM   | 0.2076      | 344.08289    | 27.62641     | 4.7539  |

Totals : 7237.95251 1307.12946

## Compound 10b

Acq. Operator : BY  
Acq. Instrument : 1260R  
Injection Date : 4/12/2024 6:36:23 PM  
Seq. Line : 1  
Location : 33  
Inj : 1  
Inj Volume : 20.000 µl  
Different Inj Volume from Sample Entry! Actual Inj Volume : 10.000 µl  
Acq. Method : D:\Data\ZLM\DATA\20240412\20240412 2024-04-12 18-34-58\20240316--ZK-15MIN-35-95ACN.M  
Last changed : 4/12/2024 12:05:51 AM by BY  
Analysis Method : D:\DATA\KUN\METHOD\20240204-ZK-15MIN-25-90ACN.M  
Last changed : 4/12/2024 4:57:03 PM by BY  
(modified after loading)  
Method Info : 90% H2O and 10% ACE

Additional Info : Peak(s) manually integrated

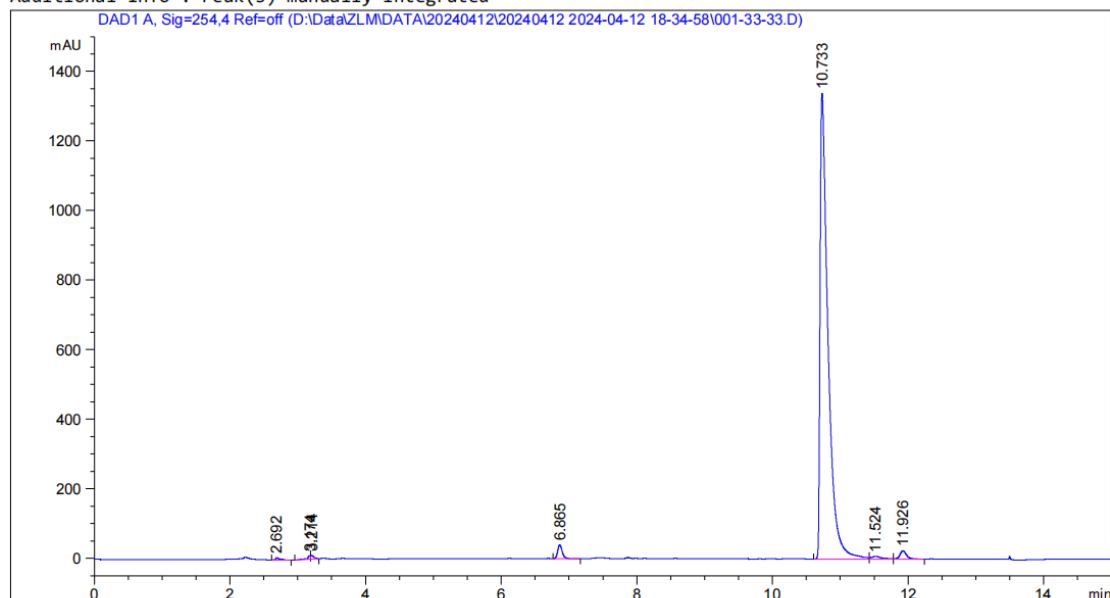

### Area Percent Report

Sorted By : Signal  
Multiplier : 1.0000  
Dilution : 1.0000  
Do not use Multiplier & Dilution Factor with ISTDs

Signal 1: DAD1 A, Sig=254,4 Ref=off

| Peak # | RetTime [min] | Type | Width [min] | Area [mAU*s] | Height [mAU] | Area % |
|--------|---------------|------|-------------|--------------|--------------|--------|
| 1      | 2.692         | VB   | 0.0677      | 36.18795     | 7.13532      | 0.3165 |
| 2      | 3.174         | BV   | 0.0472      | 31.69120     | 9.43974      | 0.2772 |
| 3      | 3.214         | VB   | 0.0472      | 34.31916     | 10.20702     | 0.3001 |

| Peak # | RetTime [min] | Type | Width [min] | Area [mAU*s] | Height [mAU] | Area %  |
|--------|---------------|------|-------------|--------------|--------------|---------|
| 4      | 6.865         | VB   | 0.0714      | 191.38441    | 40.68355     | 1.6737  |
| 5      | 10.733        | BV   | 0.1159      | 1.08908e4    | 1338.75342   | 95.2437 |
| 6      | 11.524        | VV   | 0.1440      | 86.61273     | 8.24843      | 0.7575  |
| 7      | 11.926        | VB   | 0.1024      | 163.66512    | 24.05088     | 1.4313  |

Totals : 1.14346e4 1438.51837

## Compound 10c

Acq. Operator : BY  
Acq. Instrument : 1260R  
Injection Date : 4/12/2024 12:09:00 AM  
Seq. Line : 1  
Location : 3  
Inj : 1  
Inj Volume : 20.000 µl  
Acq. Method : D:\Data\ZXD\DATA\20240411-ZXD-1\zxd-1F\_LC 2024-04-12 00-07-33\20240316--ZK-15MIN-35-95ACN.M  
Last changed : 4/12/2024 12:05:51 AM by BY  
Analysis Method : D:\DATA\KUN\METHOD\20240204-ZK-15MIN-25-90ACN.M  
Last changed : 4/12/2024 3:25:38 PM by BY  
(modified after loading)  
Method Info : 90% H2O and 10% ACE

Additional Info : Peak(s) manually integrated

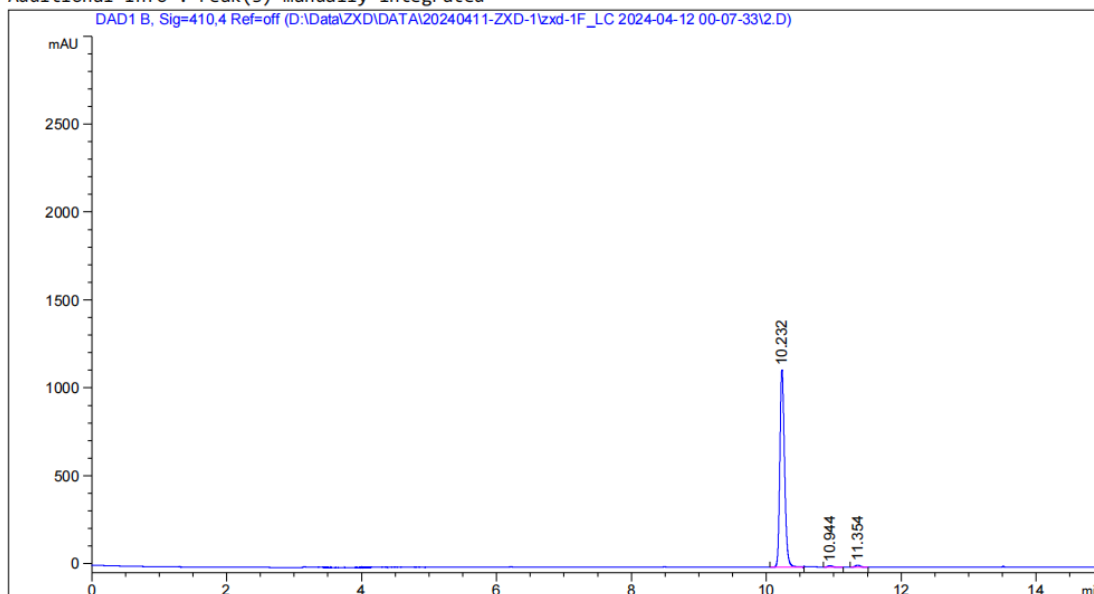

### Area Percent Report

Sorted By : Signal  
Multiplier : 1.0000  
Dilution : 1.0000  
Do not use Multiplier & Dilution Factor with ISTDs

Signal 1: DAD1 B, Sig=410,4 Ref=off

| Peak # | RetTime [min] | Type | Width [min] | Area [mAU*s] | Height [mAU] | Area %  |
|--------|---------------|------|-------------|--------------|--------------|---------|
| 1      | 10.232        | BV   | 0.0746      | 5452.07373   | 1124.41870   | 98.2411 |
| 2      | 10.944        | VB   | 0.0650      | 39.60649     | 7.63603      | 0.7137  |
| 3      | 11.354        | VB   | 0.0640      | 58.00705     | 11.66171     | 1.0452  |

Totals : 5549.68727 1143.71644

## Compound 10d

Acq. Operator : BY  
Acq. Instrument : 1260R  
Injection Date : 4/18/2024 8:27:22 PM  
Seq. Line : 1  
Location : 61  
Inj : 1  
Inj Volume : 20.000 µl  
Different Inj Volume from Sample Entry! Actual Inj Volume : 10.000 µl  
Acq. Method : D:\Data\ZLM\DATA\20240416-2\20240416 2024-04-18 20-25-58\20240316--ZK-15MIN-35-95ACN.M  
Last changed : 4/12/2024 12:05:51 AM by BY  
Analysis Method : D:\DATA\ZLM\METHOD\AB-ACN-H2O(5-90)15MIN.M  
Last changed : 4/19/2024 12:04:54 AM by BY  
(modified after loading)  
Method Info : HYDRO RP-80A

Additional Info : Peak(s) manually integrated

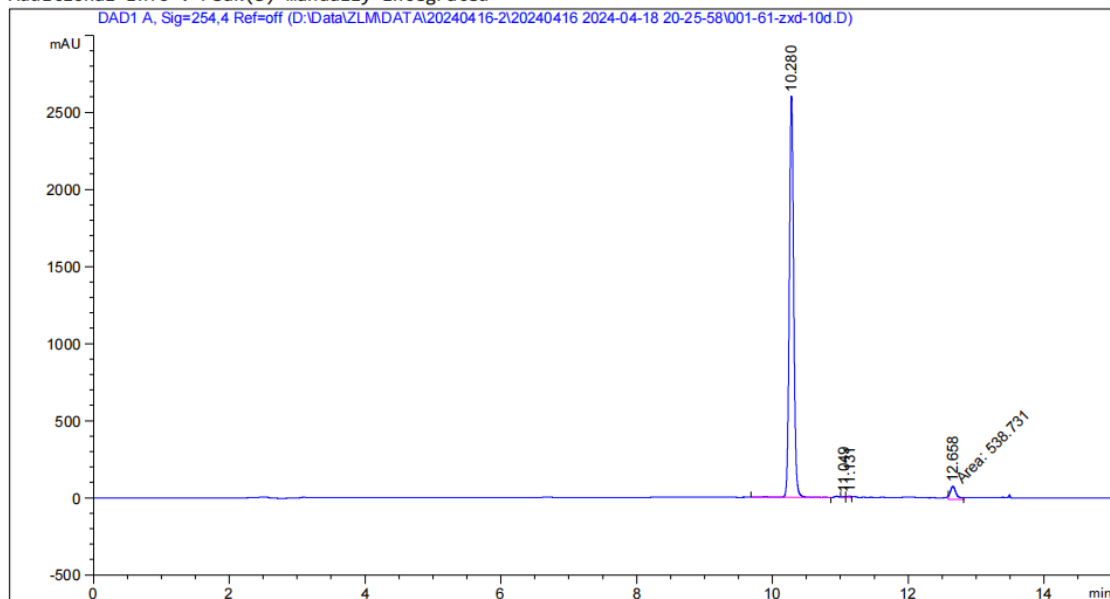

### Area Percent Report

Sorted By : Signal  
Multiplier : 1.0000  
Dilution : 1.0000  
Do not use Multiplier & Dilution Factor with ISTDs

Signal 1: DAD1 A, Sig=254,4 Ref=off

| Peak # | RetTime [min] | Type | Width [min] | Area [mAU*s] | Height [mAU] | Area %  |
|--------|---------------|------|-------------|--------------|--------------|---------|
| 1      | 10.280        | VV R | 0.0686      | 1.17049e4    | 2605.04297   | 95.2729 |
| 2      | 11.049        | BV   | 0.0424      | 8.24244      | 2.79510      | 0.0671  |
| 3      | 11.131        | VV   | 0.0580      | 33.78830     | 8.39511      | 0.2750  |

  

| Peak # | RetTime [min] | Type | Width [min] | Area [mAU*s] | Height [mAU] | Area % |
|--------|---------------|------|-------------|--------------|--------------|--------|
| 4      | 12.658        | MM   | 0.1045      | 538.73102    | 85.89119     | 4.3850 |

Totals : 1.22857e4 2702.12437

## Compound 10e

Acq. Operator : BY  
Acq. Instrument : 1260R  
Injection Date : 4/12/2024 12:58:25 AM  
Seq. Line : 4  
Location : 6  
Inj : 1  
Inj Volume : 20.000 µl  
Acq. Method : D:\Data\ZXD\DATA\20240411-ZXD-1\zxd-1F\_LC 2024-04-12 00-07-33\20240316--ZK-15MIN-35-95ACN.M  
Last changed : 4/12/2024 12:05:51 AM by BY  
Analysis Method : D:\DATA\KUN\METHOD\20240204-ZK-15MIN-25-90ACN.M  
Last changed : 4/12/2024 3:37:06 PM by BY  
(modified after loading)  
Method Info : 90% H2O and 10% ACE

Additional Info : Peak(s) manually integrated

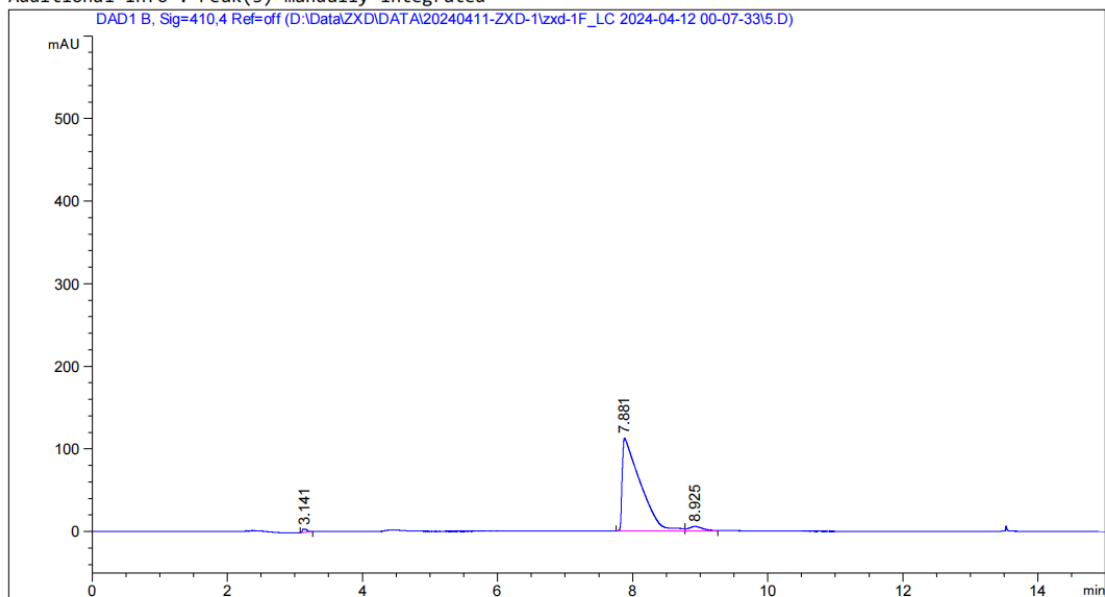

### Area Percent Report

Sorted By : Signal  
Multiplier : 1.0000  
Dilution : 1.0000  
Do not use Multiplier & Dilution Factor with ISTDs

Signal 1: DAD1 B, Sig=410,4 Ref=off

| Peak # | RetTime [min] | Type | Width [min] | Area [mAU*s] | Height [mAU] | Area %  |
|--------|---------------|------|-------------|--------------|--------------|---------|
| 1      | 3.141         | BB   | 0.0533      | 18.00039     | 4.05547      | 0.8259  |
| 2      | 7.881         | BV   | 0.2354      | 2085.56421   | 112.41651    | 95.6857 |
| 3      | 8.925         | VV   | 0.1683      | 76.03349     | 5.36567      | 3.4884  |

Totals : 2179.59809 121.83766

## Compound 10f

Acq. Operator : BY  
Acq. Instrument : 1260R  
Injection Date : 4/12/2024 1:14:58 AM  
Seq. Line : 5  
Location : 7  
Inj : 1  
Inj Volume : 20.000 µl  
Acq. Method : D:\Data\ZXD\DATA\20240411-ZXD-1\zxd-1F\_LC 2024-04-12 00-07-33\20240316--ZK-15MIN-35-95ACN.M  
Last changed : 4/12/2024 12:05:51 AM by BY  
Analysis Method : D:\DATA\KUN\METHOD\20240204-ZK-15MIN-25-90ACN.M  
Last changed : 4/12/2024 3:38:15 PM by BY  
(modified after loading)  
Method Info : 90% H2O and 10% ACE

Additional Info : Peak(s) manually integrated

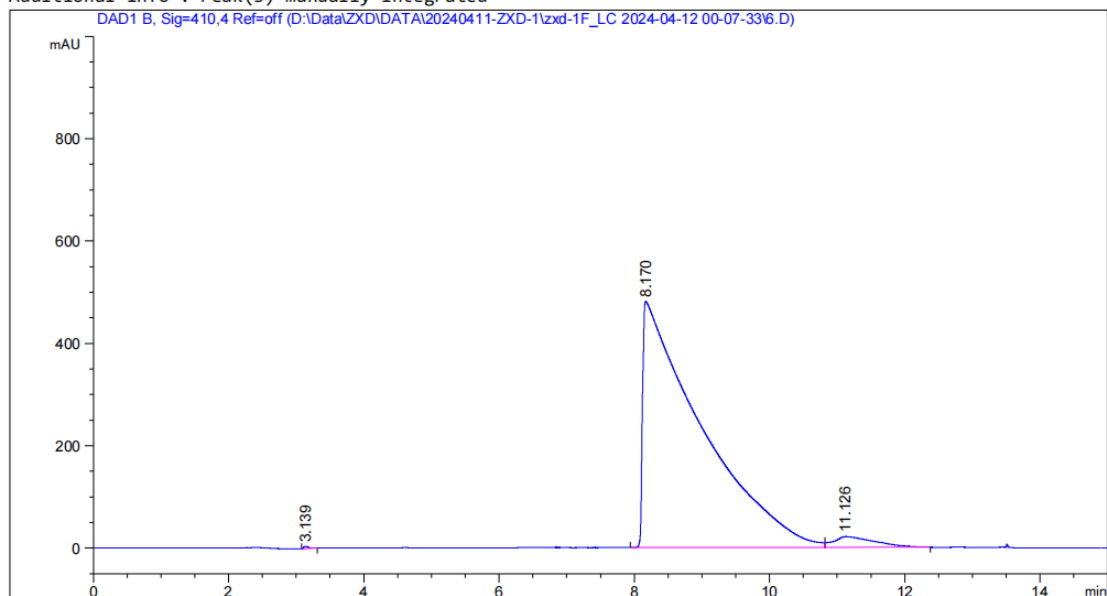

### Area Percent Report

Sorted By : Signal  
Multiplier : 1.0000  
Dilution : 1.0000  
Do not use Multiplier & Dilution Factor with ISTDs

Signal 1: DAD1 B, Sig=410,4 Ref=off

| Peak # | RetTime [min] | Type | Width [min] | Area [mAU*s] | Height [mAU] | Area %  |
|--------|---------------|------|-------------|--------------|--------------|---------|
| 1      | 3.139         | BB   | 0.0618      | 20.29373     | 4.17090      | 0.0684  |
| 2      | 8.170         | BV   | 0.7097      | 2.87768e4    | 481.19464    | 96.9540 |
| 3      | 11.126        | VB   | 0.4901      | 883.77112    | 21.08182     | 2.9776  |

Totals : 2.96808e4 506.44736

## Compound 10g

Acq. Operator : BY  
Acq. Instrument : 1260R  
Injection Date : 4/12/2024 7:09:12 PM  
Seq. Line : 3  
Location : 35  
Inj : 1  
Inj Volume : 20.000 µl  
Different Inj Volume from Sample Entry! Actual Inj Volume : 10.000 µl  
Acq. Method : D:\Data\ZLM\DATA\20240412\20240412 2024-04-12 18-34-58\20240316--ZK-15MIN-35-95ACN.M  
Last changed : 4/12/2024 12:05:51 AM by BY  
Analysis Method : D:\DATA\KUN\METHOD\20240204-ZK-15MIN-25-90ACN.M  
Last changed : 4/12/2024 4:57:03 PM by BY  
(modified after loading)  
Method Info : 90% H2O and 10% ACE

Additional Info : Peak(s) manually integrated

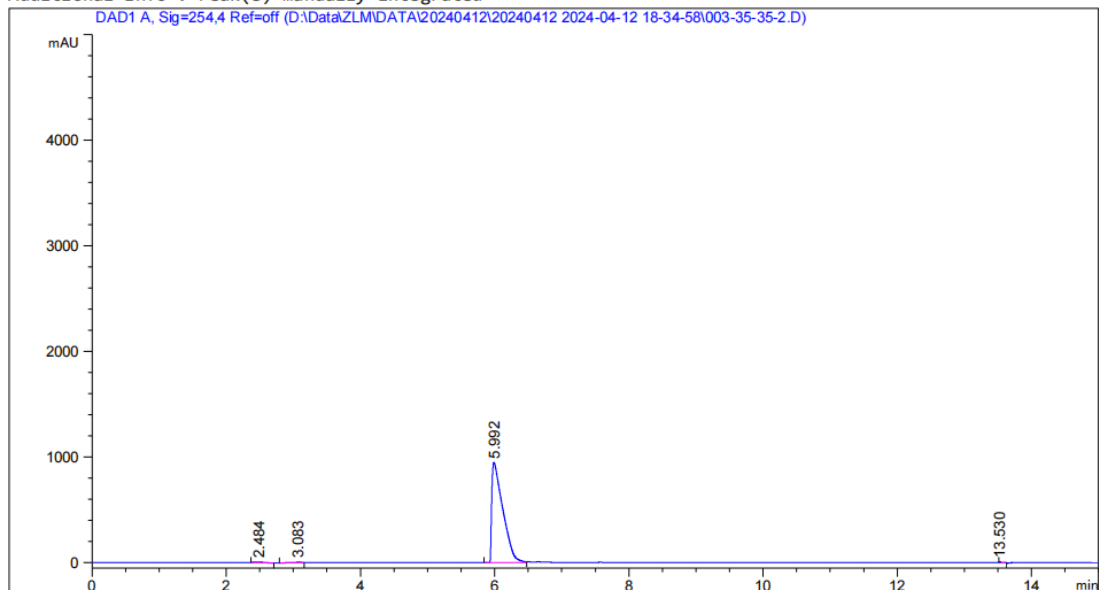

### Area Percent Report

Sorted By : Signal  
Multiplier : 1.0000  
Dilution : 1.0000  
Do not use Multiplier & Dilution Factor with ISTDs

Signal 1: DAD1 A, Sig=254,4 Ref=off

| Peak # | RetTime [min] | Type | Width [min] | Area [mAU*s] | Height [mAU] | Area %  |
|--------|---------------|------|-------------|--------------|--------------|---------|
| 1      | 2.484         | VB   | 0.1122      | 61.26885     | 6.51511      | 0.5600  |
| 2      | 3.083         | BV   | 0.0836      | 37.81834     | 6.03738      | 0.3456  |
| 3      | 5.992         | BV   | 0.1579      | 1.08280e4    | 947.29718    | 98.9644 |

  

| Peak # | RetTime [min] | Type | Width [min] | Area [mAU*s] | Height [mAU] | Area % |
|--------|---------------|------|-------------|--------------|--------------|--------|
| 4      | 13.530        | VB   | 0.0191      | 14.22219     | 10.66458     | 0.1300 |

Totals : 1.09414e4 970.51425

## Compound 10h

Acq. Operator : BY Seq. Line : 2  
Acq. Instrument : 1260R Location : 34  
Injection Date : 4/12/2024 6:52:48 PM Inj : 1  
Inj Volume : 20.000 µl  
Different Inj Volume from Sample Entry! Actual Inj Volume : 10.000 µl  
Acq. Method : D:\Data\ZLM\DATA\20240412\20240412 2024-04-12 18-34-58\20240316--ZK-15MIN-35-95ACN.M  
Last changed : 4/12/2024 12:05:51 AM by BY  
Analysis Method : D:\DATA\KUN\METHOD\20240204-ZK-15MIN-25-90ACN.M  
Last changed : 4/12/2024 4:57:03 PM by BY  
(modified after loading)  
Method Info : 90% H2O and 10% ACE

Additional Info : Peak(s) manually integrated

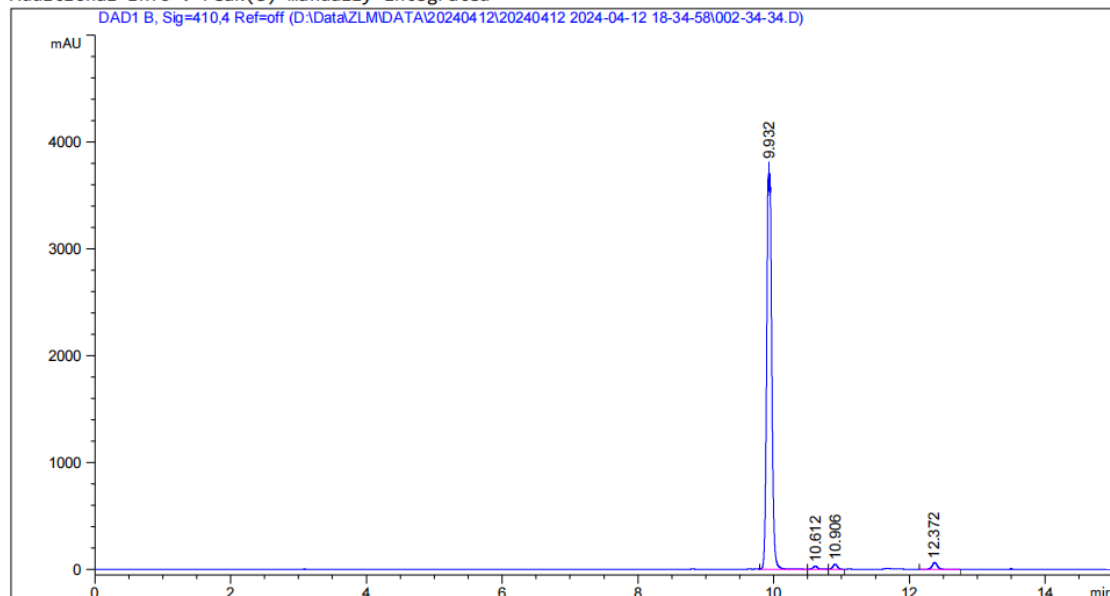

### Area Percent Report

Sorted By : Signal  
Multiplier : 1.0000  
Dilution : 1.0000  
Do not use Multiplier & Dilution Factor with ISTDs

Signal 1: DAD1 B, Sig=410,4 Ref=off

| Peak # | RetTime [min] | Type | Width [min] | Area [mAU*s] | Height [mAU] | Area %  |
|--------|---------------|------|-------------|--------------|--------------|---------|
| 1      | 9.932         | VV   | 0.0605      | 1.92137e4    | 3798.98242   | 96.4796 |
| 2      | 10.612        | VV   | 0.0760      | 152.79659    | 29.94452     | 0.7673  |
| 3      | 10.906        | VV   | 0.0675      | 218.24248    | 48.99380     | 1.0959  |

  

| Peak # | RetTime [min] | Type | Width [min] | Area [mAU*s] | Height [mAU] | Area % |
|--------|---------------|------|-------------|--------------|--------------|--------|
| 4      | 12.372        | BB   | 0.0793      | 330.03577    | 63.31224     | 1.6572 |

Totals : 1.99147e4 3941.23297

## Compound 10i

Acq. Operator : BY Seq. Line : 1  
Acq. Instrument : 1260R Location : 62  
Injection Date : 4/18/2024 11:27:30 PM Inj : 1  
Inj Volume : 20.000 µl  
Different Inj Volume from Sample Entry! Actual Inj Volume : 1.500 µl  
Acq. Method : D:\Data\ZLM\DATA\20240416-2\20240416 2024-04-18 23-25-24\20240316--ZK-15MIN  
-35-95ACN.M  
Last changed : 4/12/2024 12:05:51 AM by BY  
Analysis Method : D:\Data\ZLM\METHOD\AB-ACN-H2O(5-90)15MIN.M  
Last changed : 4/18/2024 11:55:56 PM by BY  
(modified after loading)  
Method Info : HYDRO RP-80A

Additional Info : Peak(s) manually integrated

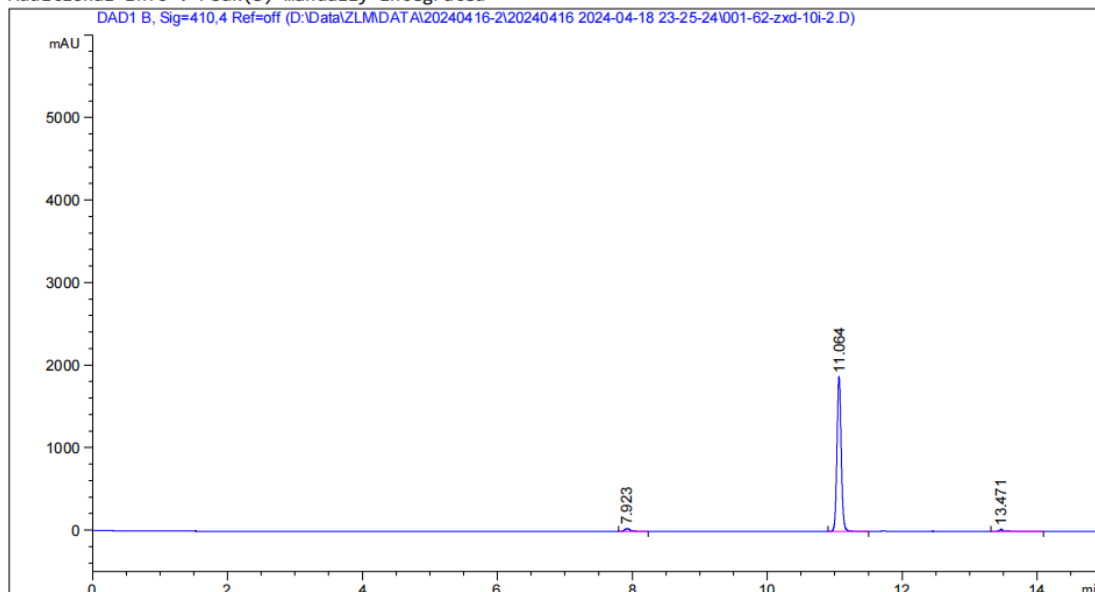

### Area Percent Report

Sorted By : Signal  
Multiplier : 1.0000  
Dilution : 1.0000  
Do not use Multiplier & Dilution Factor with ISTDs

Signal 1: DAD1 B, Sig=410,4 Ref=off

| Peak # | RetTime [min] | Type | Width [min] | Area [mAU*s] | Height [mAU] | Area %  |
|--------|---------------|------|-------------|--------------|--------------|---------|
| 1      | 7.923         | BB   | 0.0808      | 190.41331    | 35.11571     | 2.2311  |
| 2      | 11.064        | BB   | 0.0676      | 8221.08691   | 1875.74304   | 96.3270 |
| 3      | 13.471        | BB   | 0.0529      | 123.06314    | 29.38262     | 1.4419  |

  

| Peak #   | RetTime [min] | Type | Width [min] | Area [mAU*s] | Height [mAU] | Area % |
|----------|---------------|------|-------------|--------------|--------------|--------|
| Totals : |               |      |             |              |              |        |
|          |               |      |             | 8534.56337   | 1940.24137   |        |

## Compound 10j

Acq. Operator : BY  
Acq. Instrument : 1260R  
Injection Date : 4/18/2024 11:43:52 PM  
Seq. Line : 2  
Location : 63  
Inj : 1  
Inj Volume : 20.000 µl  
Different Inj Volume from Sample Entry! Actual Inj Volume : 1.500 µl  
Acq. Method : D:\Data\ZLM\DATA\20240416-2\20240416 2024-04-18 23-25-24\20240316--ZK-15MIN-35-95ACN.M  
Last changed : 4/12/2024 12:05:51 AM by BY  
Analysis Method : D:\DATA\ZLM\METHOD\AB-ACN-H2O(5-90)15MIN.M  
Last changed : 4/19/2024 12:10:27 AM by BY  
(modified after loading)  
Method Info : HYDRO RP-80A

Additional Info : Peak(s) manually integrated

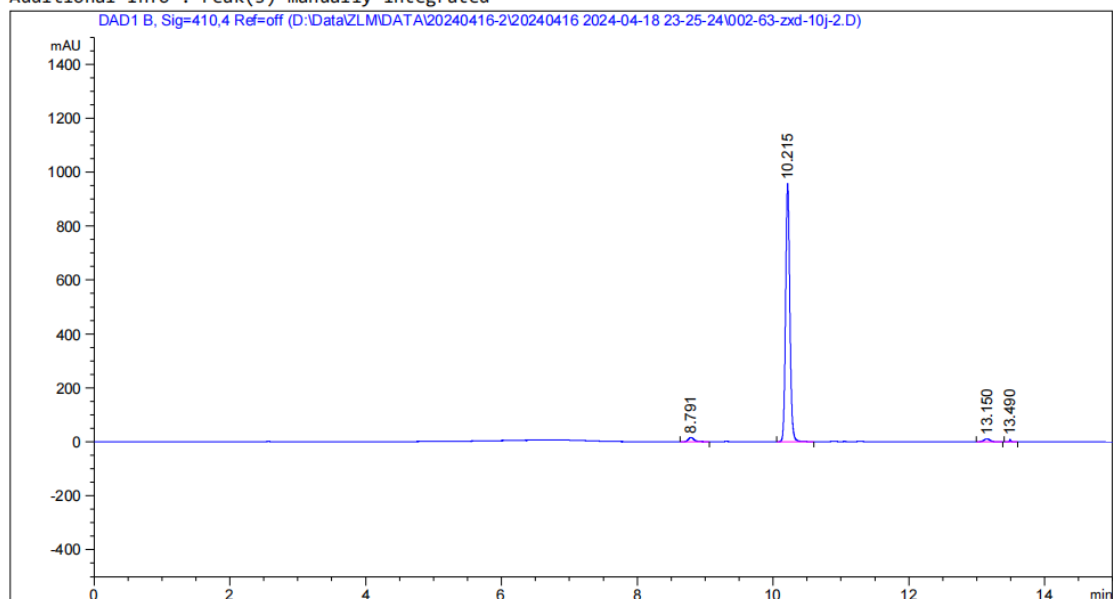

### Area Percent Report

Sorted By : Signal  
Multiplier : 1.0000  
Dilution : 1.0000  
Do not use Multiplier & Dilution Factor with ISTDs

Signal 1: DAD1 B, Sig=410,4 Ref=off

| Peak # | RetTime [min] | Type | Width [min] | Area [mAU*s] | Height [mAU] | Area %  |
|--------|---------------|------|-------------|--------------|--------------|---------|
| 1      | 8.791         | BB   | 0.0831      | 87.31108     | 15.64773     | 2.0258  |
| 2      | 10.215        | BB   | 0.0666      | 4148.13672   | 956.85345    | 96.2472 |
| 3      | 13.150        | BB   | 0.0822      | 64.82144     | 10.93350     | 1.5040  |

| Peak # | RetTime [min] | Type | Width [min] | Area [mAU*s] | Height [mAU] | Area % |
|--------|---------------|------|-------------|--------------|--------------|--------|
| 4      | 13.490        | BB   | 0.0177      | 9.60909      | 7.88929      | 0.2230 |

Totals : 4309.87833 991.32397

## Compound 10k

Acq. Operator : BY Seq. Line : 1  
Acq. Instrument : 1260R Location : 71  
Injection Date : 4/19/2024 4:11:46 AM Inj : 1  
Inj Volume : 20.000 µl  
Different Inj Volume from Sample Entry! Actual Inj Volume : 3.000 µl  
Acq. Method : D:\Data\ZLM\DATA\20240416-2\20240416 2024-04-19 04-10-26\20240316--ZK-15MIN  
-35-95ACN.M  
Last changed : 4/12/2024 12:05:51 AM by BY  
Analysis Method : D:\DATA\ZLM\METHOD\AB-ACN-H2O(5-90)15MIN.M  
Last changed : 4/19/2024 11:11:40 AM by BY  
(modified after loading)  
Method Info : HYDRO RP-80A

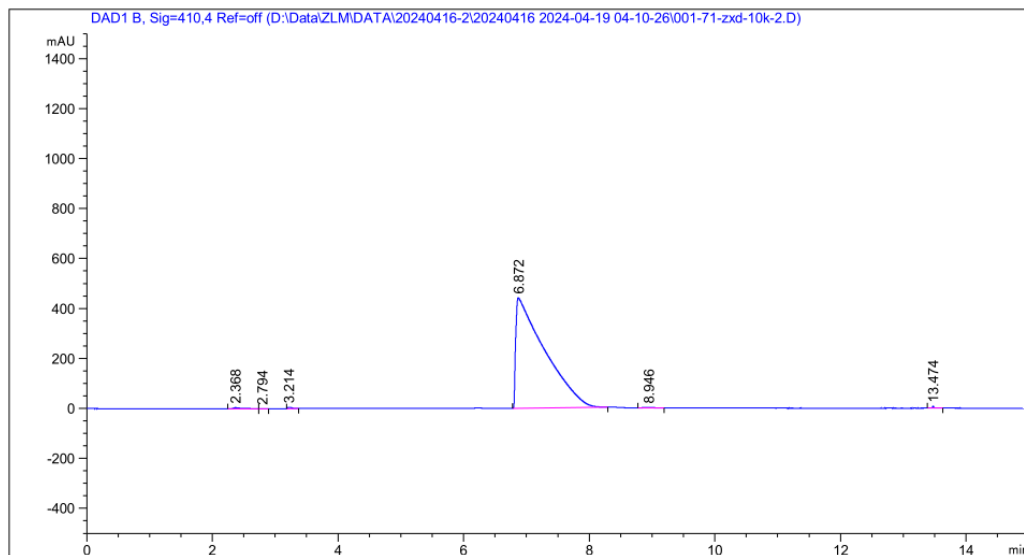

### Area Percent Report

Sorted By : Signal  
Multiplier : 1.0000  
Dilution : 1.0000  
Do not use Multiplier & Dilution Factor with ISTDs

Signal 1: DAD1 B, Sig=410,4 Ref=off

| Peak # | RetTime [min] | Type | Width [min] | Area [mAU*s] | Height [mAU] | Area %  |
|--------|---------------|------|-------------|--------------|--------------|---------|
| 1      | 2.368         | BV   | 0.1310      | 50.60454     | 4.54075      | 0.3572  |
| 2      | 2.794         | VB   | 0.0616      | 6.85166      | 1.32963      | 0.0484  |
| 3      | 3.214         | BB   | 0.0673      | 26.18634     | 5.52393      | 0.1849  |
| 4      | 6.872         | BB   | 0.3858      | 1.40456e4    | 440.78781    | 99.1536 |
| 5      | 8.946         | BB   | 0.1243      | 25.36696     | 2.41083      | 0.1791  |
| 6      | 13.474        | BB   | 0.0197      | 10.89408     | 8.09205      | 0.0769  |

Totals : 1.41655e4 462.68499

## Compound 10l

Acq. Operator : BY  
Acq. Instrument : 1260R  
Injection Date : 4/12/2024 2:54:03 AM  
Seq. Line : 11  
Location : 13  
Inj : 1  
Inj Volume : 20.000 µl  
Acq. Method : D:\Data\ZXD\DATA\20240411-ZXD-1\zxd-1F\_LC 2024-04-12 00-07-33\20240316--ZK-15MIN-35-95ACN.M  
Last changed : 4/12/2024 12:05:51 AM by BY  
Analysis Method : D:\DATA\ZLM\METHOD\AB-ACN-H2O(5-90)15MIN.M  
Last changed : 4/19/2024 11:32:58 AM by BY  
(modified after loading)  
Method Info : HYDRO RP-80A

Additional Info : Peak(s) manually integrated

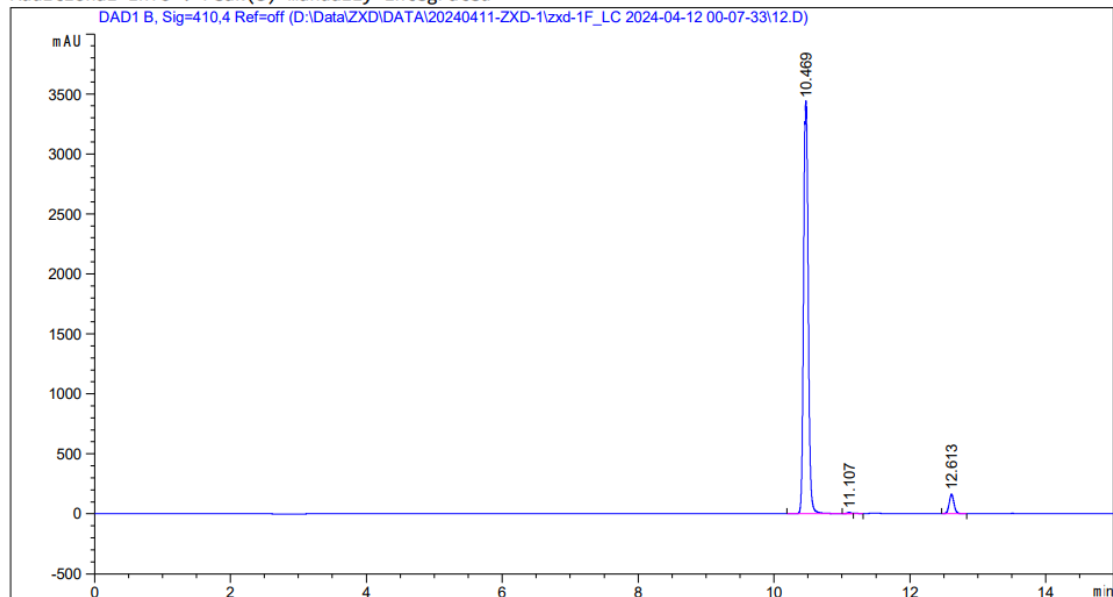

### Area Percent Report

Sorted By : Signal  
Multiplier : 1.0000  
Dilution : 1.0000  
Do not use Multiplier & Dilution Factor with ISTDs

Signal 1: DAD1 B, Sig=410,4 Ref=off

| Peak # | RetTime [min] | Type | Width [min] | Area [mAU*s] | Height [mAU] | Area %  |
|--------|---------------|------|-------------|--------------|--------------|---------|
| 1      | 10.469        | BV R | 0.0574      | 1.64379e4    | 3429.56763   | 95.1396 |
| 2      | 11.107        | VV E | 0.0617      | 40.21786     | 9.53596      | 0.2328  |
| 3      | 12.613        | BB   | 0.0761      | 799.54175    | 161.86668    | 4.6276  |

Totals : 1.72777e4 3600.97027

## Compound 10m

Acq. Operator : BY  
Acq. Instrument : 1260R  
Injection Date : 4/19/2024 12:00:14 AM  
Seq. Line : 3  
Location : 64  
Inj : 1  
Inj Volume : 20.000 µl  
Different Inj Volume from Sample Entry! Actual Inj Volume : 1.500 µl  
Acq. Method : D:\Data\ZLM\DATA\20240416-2\20240416 2024-04-18 23-25-24\20240316--ZK-15MIN-35-95ACN.M  
Last changed : 4/12/2024 12:05:51 AM by BY  
Analysis Method : D:\Data\ZLM\METHOD\AB-ACN-H2O(5-90)15MIN.M  
Last changed : 4/19/2024 12:34:52 AM by BY  
(modified after loading)  
Method Info : HYDRO RP-80A

Additional Info : Peak(s) manually integrated

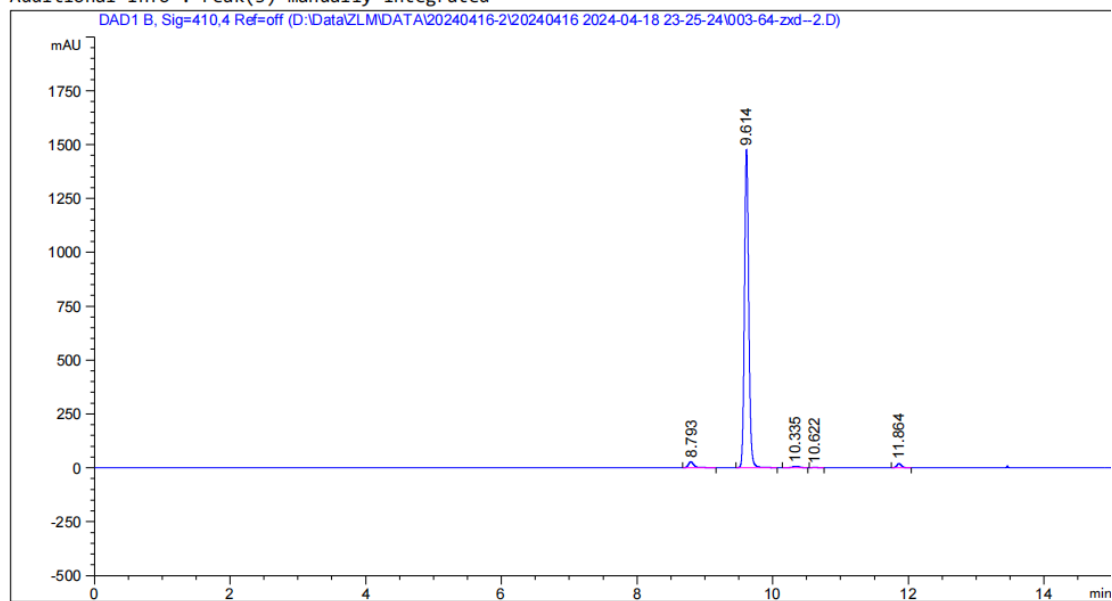

### Area Percent Report

Sorted By : Signal  
Multiplier : 1.0000  
Dilution : 1.0000  
Do not use Multiplier & Dilution Factor with ISTDs

Signal 1: DAD1 B, Sig=410,4 Ref=off

| Peak # | RetTime [min] | Type | Width [min] | Area [mAU*s] | Height [mAU] | Area %  |
|--------|---------------|------|-------------|--------------|--------------|---------|
| 1      | 8.793         | BV R | 0.0820      | 151.90813    | 27.70000     | 2.2502  |
| 2      | 9.614         | BB   | 0.0671      | 6456.26367   | 1475.33154   | 95.6360 |
| 3      | 10.335        | BB   | 0.0835      | 44.61168     | 6.34394      | 0.6608  |
| Peak # | RetTime [min] | Type | Width [min] | Area [mAU*s] | Height [mAU] | Area %  |
| 4      | 10.622        | BB   | 0.0545      | 8.94564      | 2.04806      | 0.1325  |
| 5      | 11.864        | BB   | 0.0708      | 89.14001     | 19.15693     | 1.3204  |

Totals : 6750.86913 1530.58047

## Compound 10n

Acq. Operator : BY  
Acq. Instrument : 1260R  
Injection Date : 4/19/2024 12:16:38 AM  
Seq. Line : 4  
Location : 65  
Inj : 1  
Inj Volume : 20.000 µl  
Different Inj Volume from Sample Entry! Actual Inj Volume : 1.500 µl  
Acq. Method : D:\Data\ZLM\DATA\20240416-2\20240416 2024-04-18 23-25-24\20240316--ZK-15MIN-35-95ACN.M  
Last changed : 4/12/2024 12:05:51 AM by BY  
Analysis Method : D:\Data\ZLM\METHOD\AB-ACN-H2O(5-90)15MIN.M  
Last changed : 4/19/2024 12:36:24 AM by BY  
(modified after loading)  
Method Info : HYDRO RP-80A

Additional Info : Peak(s) manually integrated

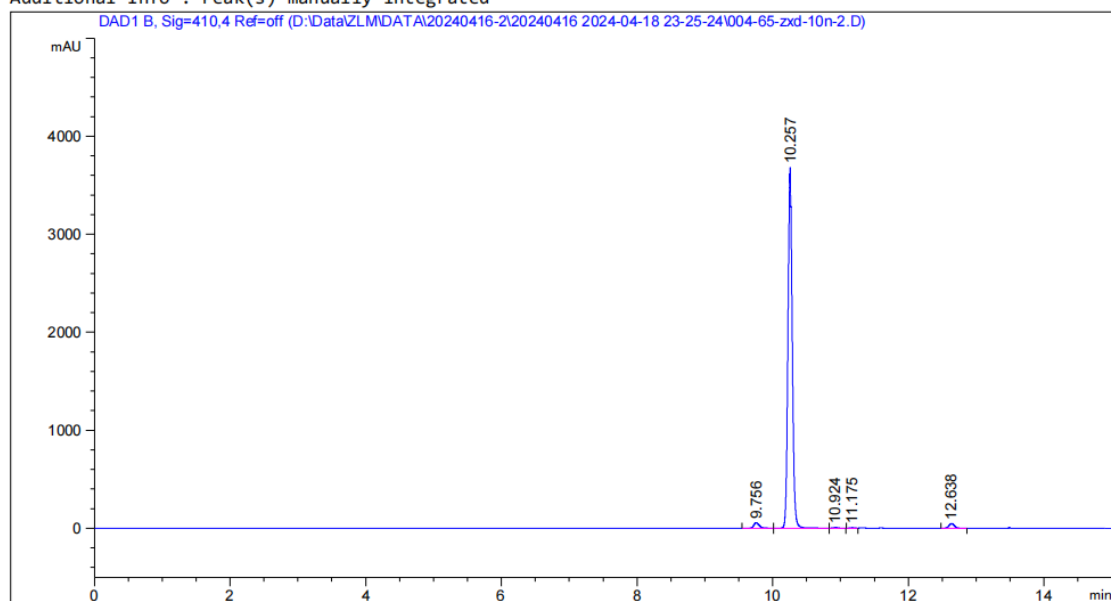

### Area Percent Report

Sorted By : Signal  
Multiplier : 1.0000  
Dilution : 1.0000  
Do not use Multiplier & Dilution Factor with ISTDs

Signal 1: DAD1 B, Sig=410,4 Ref=off

| Peak # | RetTime [min] | Type | Width [min] | Area [mAU*s] | Height [mAU] | Area %  |
|--------|---------------|------|-------------|--------------|--------------|---------|
| 1      | 9.756         | BB   | 0.0815      | 303.81830    | 56.73564     | 1.8214  |
| 2      | 10.257        | VV R | 0.0525      | 1.60662e4    | 3675.09253   | 96.3192 |
| 3      | 10.924        | VB   | 0.0586      | 31.70495     | 7.23587      | 0.1901  |
| 4      | 11.175        | BV   | 0.0543      | 23.94740     | 5.72691      | 0.1436  |
| 5      | 12.638        | BB   | 0.0809      | 254.49269    | 47.97326     | 1.5257  |

Totals : 1.66801e4 3792.76421

## Compound 11a

Acq. Operator : BY  
Acq. Instrument : 1260R  
Injection Date : 4/19/2024 4:28:04 AM  
Seq. Line : 2  
Location : 72  
Inj : 1  
Inj Volume : 20.000 µl  
Different Inj Volume from Sample Entry! Actual Inj Volume : 1.500 µl  
Acq. Method : D:\Data\ZLM\DATA\20240416-2\20240416 2024-04-19 04-10-26\20240316--ZK-15MIN-35-95ACN.M  
Last changed : 4/12/2024 12:05:51 AM by BY  
Analysis Method : D:\Data\ZLM\METHOD\AB-ACN-H2O(5-90)15MIN.M  
Last changed : 4/19/2024 11:12:29 AM by BY  
(modified after loading)  
Method Info : HYDRO RP-80A

Additional Info : Peak(s) manually integrated

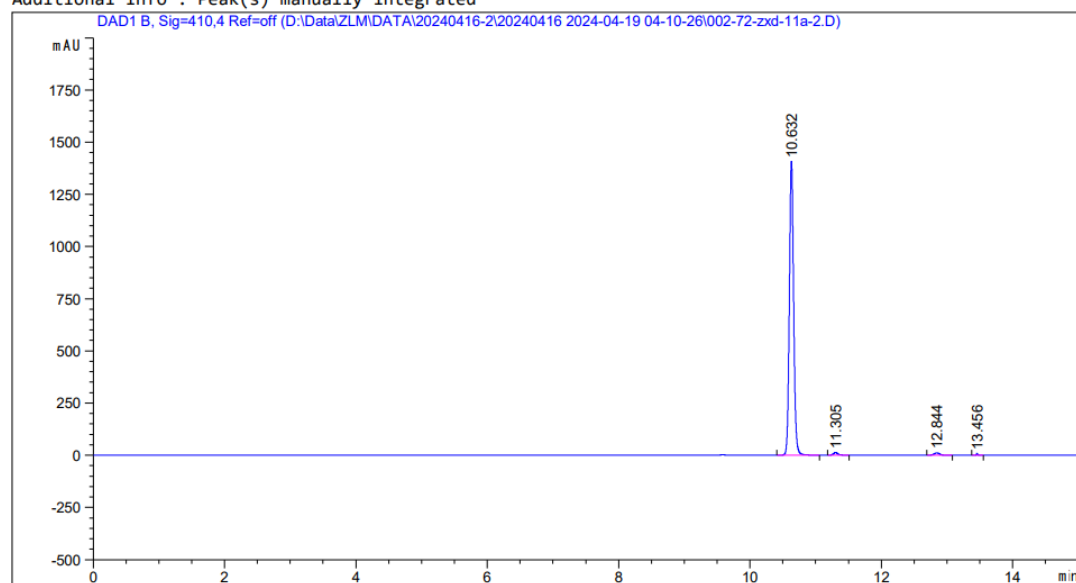

### Area Percent Report

Sorted By : Signal  
Multiplier : 1.0000  
Dilution : 1.0000  
Do not use Multiplier & Dilution Factor with ISTDs

Signal 1: DAD1 B, Sig=410,4 Ref=off

| Peak # | RetTime [min] | Type | Width [min] | Area [mAU*s] | Height [mAU] | Area %  |
|--------|---------------|------|-------------|--------------|--------------|---------|
| 1      | 10.632        | BB   | 0.0697      | 6353.18408   | 1407.23389   | 97.9894 |
| 2      | 11.305        | BB   | 0.0699      | 59.02020     | 12.66451     | 0.9103  |
| 3      | 12.844        | BB   | 0.0813      | 61.69806     | 10.77266     | 0.9516  |
| Peak # | RetTime [min] | Type | Width [min] | Area [mAU*s] | Height [mAU] | Area %  |
| 4      | 13.456        | BB   | 0.0176      | 9.63782      | 7.97042      | 0.1487  |

Totals : 6483.54016 1438.64147

## Compound 11b

Acq. Operator : BY  
Acq. Instrument : 1260R  
Injection Date : 4/19/2024 4:44:23 AM  
Seq. Line : 3  
Location : 73  
Inj : 1  
Inj Volume : 20.000 µl  
Different Inj Volume from Sample Entry! Actual Inj Volume : 3.000 µl  
Acq. Method : D:\Data\ZLM\DATA\20240416-2\20240416 2024-04-19 04-10-26\20240316--ZK-15MIN-35-95ACN.M  
Last changed : 4/12/2024 12:05:51 AM by BY  
Analysis Method : D:\DATA\ZLM\METHOD\AB-ACN-H2O(5-90)15MIN.M  
Last changed : 4/19/2024 11:13:55 AM by BY  
(modified after loading)  
Method Info : HYDRO RP-80A

Additional Info : Peak(s) manually integrated

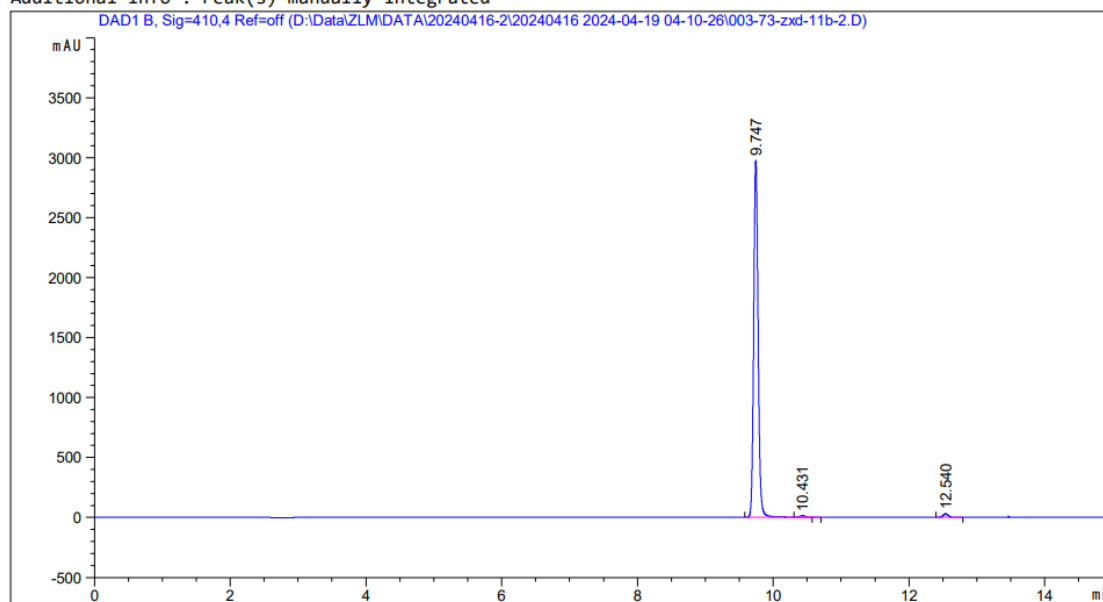

### Area Percent Report

Sorted By : Signal  
Multiplier : 1.0000  
Dilution : 1.0000  
Do not use Multiplier & Dilution Factor with ISTDs

Signal 1: DAD1 B, Sig=410,4 Ref=off

| Peak # | RetTime [min] | Type | Width [min] | Area [mAU*s] | Height [mAU] | Area %  |
|--------|---------------|------|-------------|--------------|--------------|---------|
| 1      | 9.747         | BV R | 0.0566      | 1.35502e4    | 2978.04150   | 98.3951 |
| 2      | 10.431        | VV E | 0.0648      | 59.61275     | 13.29459     | 0.4329  |
| 3      | 12.540        | BB   | 0.0808      | 161.39809    | 30.48005     | 1.1720  |

  

| Peak #   | RetTime [min] | Type | Width [min] | Area [mAU*s] | Height [mAU] | Area % |
|----------|---------------|------|-------------|--------------|--------------|--------|
| Totals : |               |      |             |              |              |        |
|          |               |      |             | 1.37712e4    | 3021.81615   |        |

## Compound 11c

Acq. Operator : BY Seq. Line : 6  
Acq. Instrument : 1260R Location : 66  
Injection Date : 4/18/2024 9:49:31 PM Inj : 1  
Inj Volume : 20.000 µl  
Different Inj Volume from Sample Entry! Actual Inj Volume : 3.000 µl  
Acq. Method : D:\Data\ZLM\DATA\20240416-2\20240416 2024-04-18 20-25-58\20240316--ZK-15MIN  
-35-95ACN.M  
Last changed : 4/12/2024 12:05:51 AM by BY  
Analysis Method : D:\DATA\ZLM\METHOD\AB-ACN-H2O(5-90)15MIN.M  
Last changed : 4/19/2024 12:06:54 AM by BY  
(modified after loading)  
Method Info : HYDRO RP-80A

Additional Info : Peak(s) manually integrated

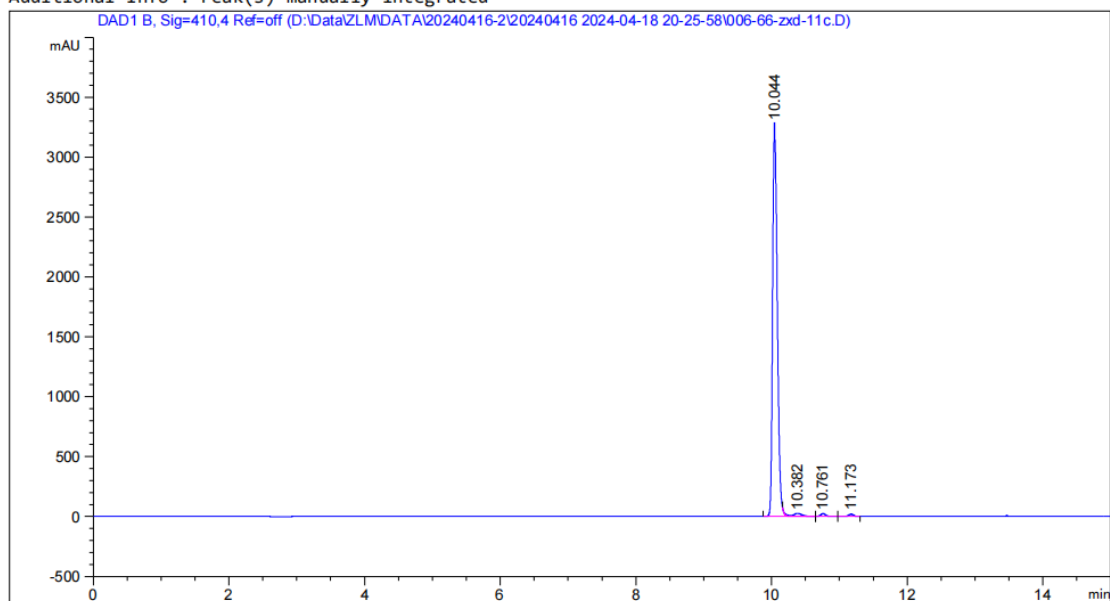

### Area Percent Report

Sorted By : Signal  
Multiplier : 1.0000  
Dilution : 1.0000  
Do not use Multiplier & Dilution Factor with ISTDs

Signal 1: DAD1 B, Sig=410,4 Ref=off

| Peak # | RetTime [min] | Type | Width [min] | Area [mAU*s] | Height [mAU] | Area %  |
|--------|---------------|------|-------------|--------------|--------------|---------|
| 1      | 10.044        | BV R | 0.0599      | 1.57088e4    | 3277.49316   | 97.1021 |
| 2      | 10.382        | VV E | 0.1437      | 262.65686    | 25.49599     | 1.6236  |
| 3      | 10.761        | VB   | 0.0753      | 115.70425    | 23.14659     | 0.7152  |
| Peak # | RetTime [min] | Type | Width [min] | Area [mAU*s] | Height [mAU] | Area %  |
| 4      | 11.173        | BV   | 0.0697      | 90.44169     | 18.61432     | 0.5591  |

Totals : 1.61776e4 3344.75007

## Compound 11d

Acq. Operator : BY  
Acq. Instrument : 1260R  
Injection Date : 4/18/2024 10:05:56 PM  
Seq. Line : 7  
Location : 67  
Inj : 1  
Inj Volume : 20.000 µl  
Different Inj Volume from Sample Entry! Actual Inj Volume : 3.000 µl  
Acq. Method : D:\Data\ZLM\DATA\20240416-2\20240416 2024-04-18 20-25-58\20240316--ZK-15MIN-35-95ACN.M  
Last changed : 4/12/2024 12:05:51 AM by BY  
Analysis Method : D:\DATA\ZLM\METHOD\AB-ACN-H2O(5-90)15MIN.M  
Last changed : 4/19/2024 12:07:47 AM by BY  
(modified after loading)  
Method Info : HYDRO RP-80A

Additional Info : Peak(s) manually integrated

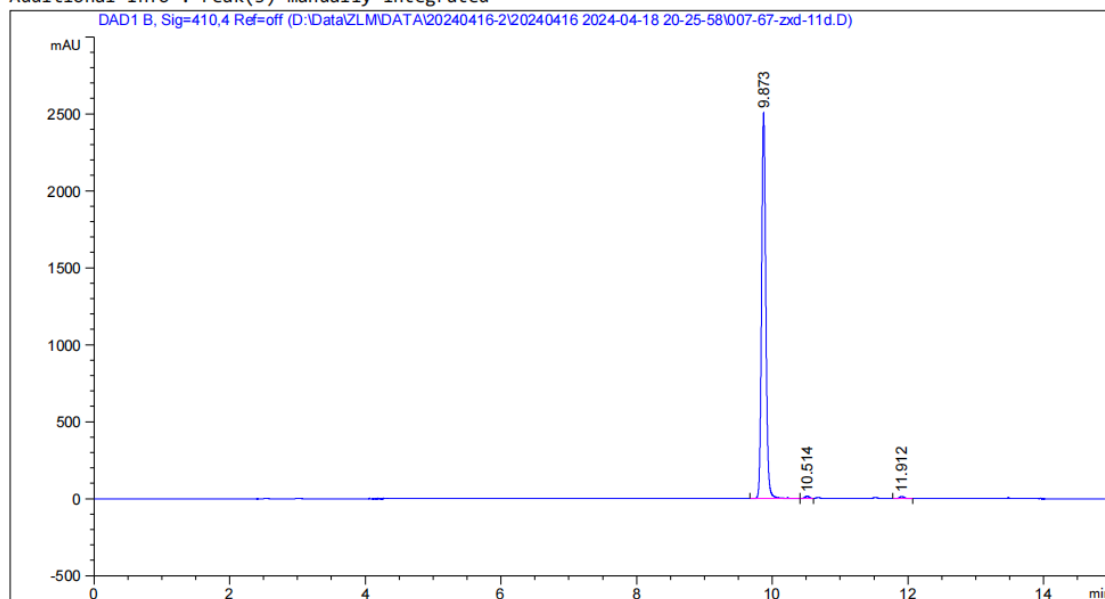

### Area Percent Report

Sorted By : Signal  
Multiplier : 1.0000  
Dilution : 1.0000  
Do not use Multiplier & Dilution Factor with ISTDs

Signal 1: DAD1 B, Sig=410,4 Ref=off

| Peak # | RetTime [min] | Type | Width [min] | Area [mAU*s] | Height [mAU] | Area %  |
|--------|---------------|------|-------------|--------------|--------------|---------|
| 1      | 9.873         | BV R | 0.0673      | 1.09259e4    | 2505.33472   | 98.8624 |
| 2      | 10.514        | BV   | 0.0652      | 64.60635     | 15.17704     | 0.5846  |
| 3      | 11.912        | BV R | 0.0671      | 61.11150     | 13.54739     | 0.5530  |

  

| Peak #   | RetTime [min] | Type | Width [min] | Area [mAU*s] | Height [mAU] | Area % |
|----------|---------------|------|-------------|--------------|--------------|--------|
| Totals : |               |      |             |              |              |        |
|          |               |      |             | 1.10516e4    | 2534.05914   |        |

## Compound 11e

Acq. Operator : BY  
Acq. Instrument : 1260R  
Injection Date : 4/12/2024 4:49:46 AM  
Seq. Line : 18  
Location : 20  
Inj : 1  
Inj Volume : 20.000 µl  
Acq. Method : D:\Data\ZXD\DATA\20240411-ZXD-1\zxd-1F\_LC 2024-04-12 00-07-33\20240316--ZK-15MIN-35-95ACN.M  
Last changed : 4/12/2024 12:05:51 AM by BY  
Analysis Method : D:\DATA\KUN\METHOD\20240204-ZK-15MIN-25-90ACN.M  
Last changed : 4/12/2024 4:21:22 PM by BY  
(modified after loading)  
Method Info : 90% H2O and 10% ACE

Additional Info : Peak(s) manually integrated

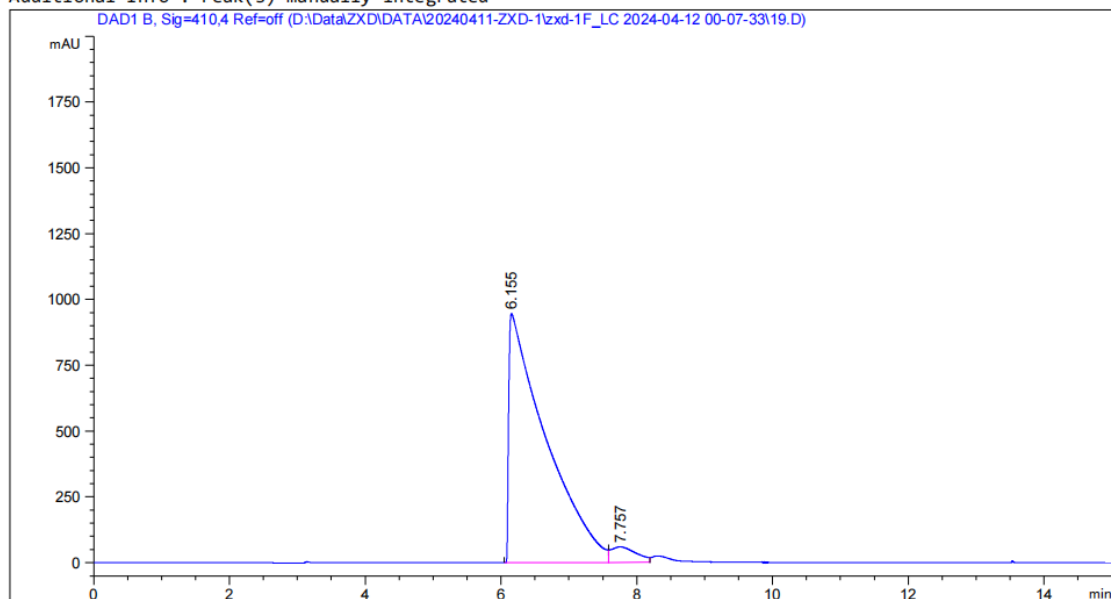

### Area Percent Report

Sorted By : Signal  
Multiplier : 1.0000  
Dilution : 1.0000  
Do not use Multiplier & Dilution Factor with ISTDs

Signal 1: DAD1 B, Sig=410,4 Ref=off

| Peak # | RetTime [min] | Type | Width [min] | Area [mAU*s] | Height [mAU] | Area %  |
|--------|---------------|------|-------------|--------------|--------------|---------|
| 1      | 6.155         | BV   | 0.4595      | 3.56240e4    | 945.72571    | 95.8358 |
| 2      | 7.757         | VV   | 0.3070      | 1547.92822   | 59.11162     | 4.1642  |

Totals : 3.71719e4 1004.83733

## Compound 11f

Acq. Operator : BY  
Acq. Instrument : 1260R  
Injection Date : 4/19/2024 5:00:49 AM  
Seq. Line : 4  
Location : 74  
Inj : 1  
Inj Volume : 20.000 µl  
Different Inj Volume from Sample Entry! Actual Inj Volume : 3.000 µl  
Acq. Method : D:\Data\ZLM\DATA\20240416-2\20240416 2024-04-19 04-10-26\20240316--ZK-15MIN-35-95ACN.M  
Last changed : 4/12/2024 12:05:51 AM by BY  
Analysis Method : D:\DATA\ZLM\METHOD\AB-ACN-H2O(5-90)15MIN.M  
Last changed : 4/19/2024 11:14:57 AM by BY  
(modified after loading)  
Method Info : HYDRO RP-80A

Additional Info : Peak(s) manually integrated

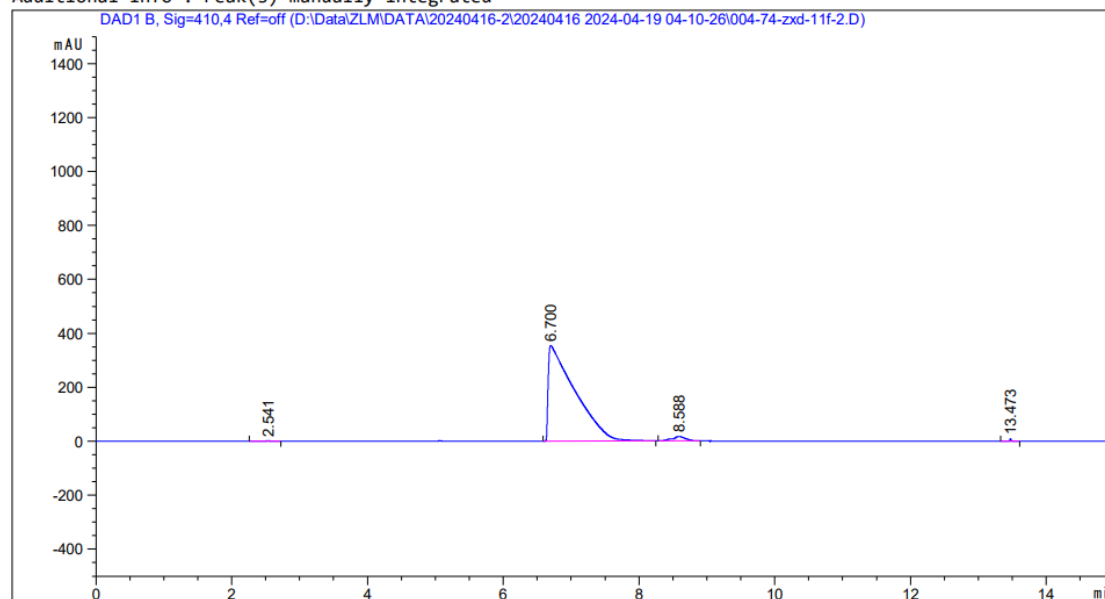

### Area Percent Report

Sorted By : Signal  
Multiplier : 1.0000  
Dilution : 1.0000  
Do not use Multiplier & Dilution Factor with ISTDs

Signal 1: DAD1 B, Sig=410,4 Ref=off

| Peak # | RetTime [min] | Type | Width [min] | Area [mAU*s] | Height [mAU] | Area %  |
|--------|---------------|------|-------------|--------------|--------------|---------|
| 1      | 2.541         | VB R | 0.0602      | 13.54403     | 2.86515      | 0.1369  |
| 2      | 6.700         | BB   | 0.3367      | 9647.68262   | 354.79312    | 97.5031 |
| 3      | 8.588         | BB   | 0.1639      | 222.22571    | 16.79710     | 2.2459  |

  

| Peak # | RetTime [min] | Type | Width [min] | Area [mAU*s] | Height [mAU] | Area % |
|--------|---------------|------|-------------|--------------|--------------|--------|
| 4      | 13.473        | BV R | 0.0191      | 11.29014     | 8.42157      | 0.1141 |

Totals : 9894.74249 382.87693

## Compound 11g

Acq. Operator : BY  
Acq. Instrument : 1260R  
Injection Date : 4/12/2024 5:22:38 AM  
Seq. Line : 20  
Location : 22  
Inj : 1  
Inj Volume : 20.000 µl  
Acq. Method : D:\Data\ZXD\DATA\20240411-ZXD-1\zxd-1F\_LC 2024-04-12 00-07-33\20240316--ZK-15MIN-35-95ACN.M  
Last changed : 4/12/2024 12:05:51 AM by BY  
Analysis Method : D:\DATA\KUN\METHOD\20240204-ZK-15MIN-25-90ACN.M  
Last changed : 4/12/2024 4:21:22 PM by BY  
(modified after loading)  
Method Info : 90% H2O and 10% ACE

Additional Info : Peak(s) manually integrated

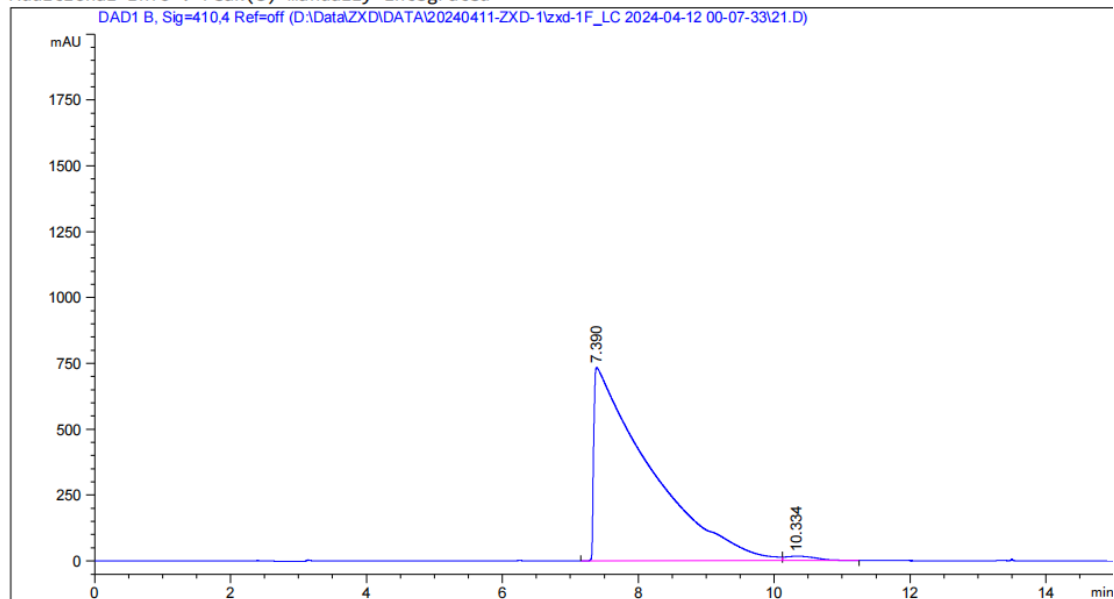

### Area Percent Report

Sorted By : Signal  
Multiplier : 1.0000  
Dilution : 1.0000  
Do not use Multiplier & Dilution Factor with ISTDs

Signal 1: DAD1 B, Sig=410,4 Ref=off

| Peak # | RetTime [min] | Type | Width [min] | Area [mAU*s] | Height [mAU] | Area %  |
|--------|---------------|------|-------------|--------------|--------------|---------|
| 1      | 7.390         | BV   | 0.6769      | 4.17285e4    | 733.30786    | 98.7609 |
| 2      | 10.334        | VB   | 0.3660      | 523.53467    | 16.75860     | 1.2391  |

Totals : 4.22520e4 750.06646

## Compound 11h

Acq. Operator : BY  
Acq. Instrument : 1260R  
Injection Date : 4/12/2024 5:39:09 AM  
Seq. Line : 21  
Location : 23  
Inj : 1  
Inj Volume : 20.000 µl  
Acq. Method : D:\Data\ZXD\DATA\20240411-ZXD-1\zxd-1F\_LC 2024-04-12 00-07-33\20240316--ZK-15MIN-35-95ACN.M  
Last changed : 4/12/2024 12:05:51 AM by BY  
Analysis Method : D:\DATA\KUN\METHOD\20240204-ZK-15MIN-25-90ACN.M  
Last changed : 4/12/2024 4:21:22 PM by BY  
(modified after loading)  
Method Info : 90% H2O and 10% ACE

Additional Info : Peak(s) manually integrated

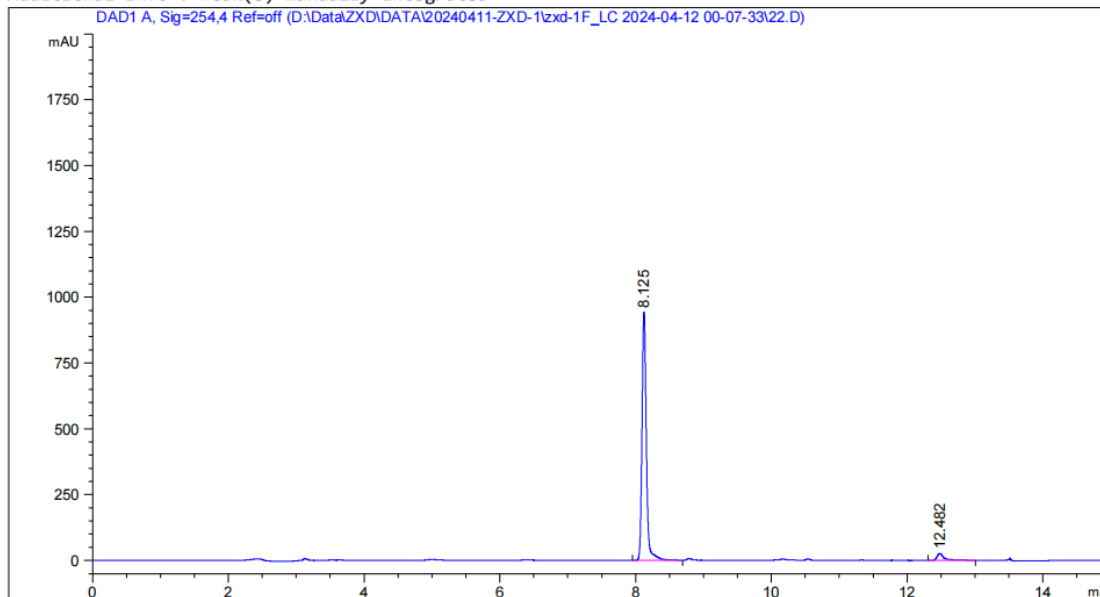

### Area Percent Report

Sorted By : Signal  
Multiplier : 1.0000  
Dilution : 1.0000  
Do not use Multiplier & Dilution Factor with ISTDs

Signal 1: DAD1 A, Sig=254,4 Ref=off

| Peak # | RetTime [min] | Type | Width [min] | Area [mAU*s] | Height [mAU] | Area %  |
|--------|---------------|------|-------------|--------------|--------------|---------|
| 1      | 8.125         | BV   | 0.0674      | 4189.67041   | 942.65955    | 95.3635 |
| 2      | 12.482        | BB   | 0.1067      | 203.69757    | 26.95395     | 4.6365  |

Totals : 4393.36798 969.61349

## Compound 11i

Acq. Operator : BY  
Acq. Instrument : 1260R  
Injection Date : 4/12/2024 5:55:35 AM  
Seq. Line : 22  
Location : 24  
Inj : 1  
Inj Volume : 20.000 µl  
Acq. Method : D:\Data\ZXD\DATA\20240411-ZXD-1\zxd-1F\_LC 2024-04-12 00-07-33\20240316--ZK-15MIN-35-95ACN.M  
Last changed : 4/12/2024 12:05:51 AM by BY  
Analysis Method : D:\DATA\KUN\METHOD\20240204-ZK-15MIN-25-90ACN.M  
Last changed : 4/12/2024 4:21:22 PM by BY  
(modified after loading)  
Method Info : 90% H2O and 10% ACE

Additional Info : Peak(s) manually integrated

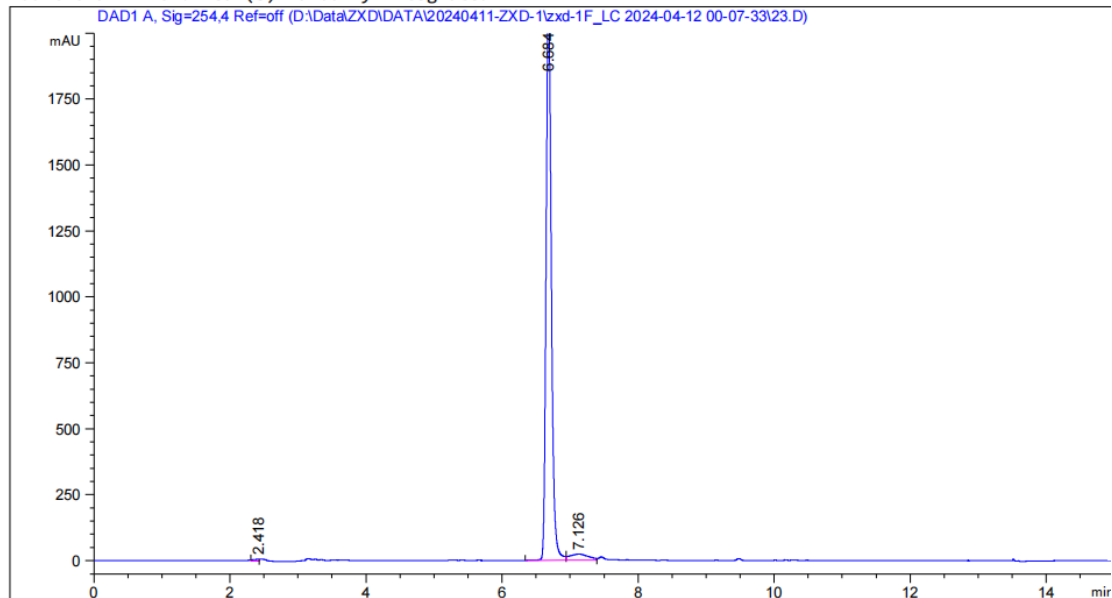

### Area Percent Report

Sorted By : Signal  
Multiplier : 1.0000  
Dilution : 1.0000  
Do not use Multiplier & Dilution Factor with ISTDs

Signal 1: DAD1 A, Sig=254,4 Ref=off

| Peak # | RetTime [min] | Type | Width [min] | Area [mAU*s] | Height [mAU] | Area %  |
|--------|---------------|------|-------------|--------------|--------------|---------|
| 1      | 2.418         | VV   | 0.0699      | 42.48051     | 7.46477      | 0.3580  |
| 2      | 6.684         | BV   | 0.0828      | 1.13872e4    | 2116.10376   | 95.9565 |
| 3      | 7.126         | VV   | 0.2310      | 437.36792    | 22.78071     | 3.6856  |

Totals : 1.18671e4 2146.34924

## Compound 11j

Acq. Operator : BY  
Acq. Instrument : 1260R  
Injection Date : 4/12/2024 7:25:42 PM  
Seq. Line : 4  
Location : 36  
Inj : 1  
Inj Volume : 20.000 µl  
Different Inj Volume from Sample Entry! Actual Inj Volume : 10.000 µl  
Acq. Method : D:\Data\ZLM\DATA\20240412\20240412 2024-04-12 18-34-58\20240316--ZK-15MIN-35-95ACN.M  
Last changed : 4/12/2024 12:05:51 AM by BY  
Analysis Method : D:\DATA\KUN\METHOD\20240204-ZK-15MIN-25-90ACN.M  
Last changed : 4/12/2024 4:57:03 PM by BY  
(modified after loading)  
Method Info : 90% H2O and 10% ACE

Additional Info : Peak(s) manually integrated

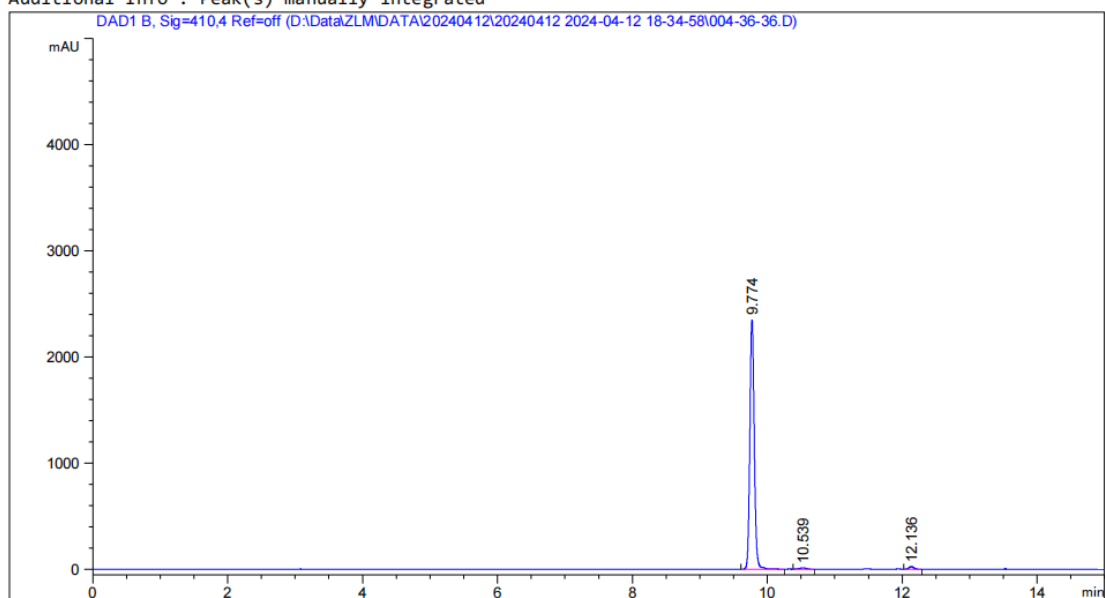

### Area Percent Report

Sorted By : Signal  
Multiplier : 1.0000  
Dilution : 1.0000  
Do not use Multiplier & Dilution Factor with ISTDs

Signal 1: DAD1 B, Sig=410,4 Ref=off

| Peak # | RetTime [min] | Type | Width [min] | Area [mAU*s] | Height [mAU] | Area %  |
|--------|---------------|------|-------------|--------------|--------------|---------|
| 1      | 9.774         | BV   | 0.0701      | 1.06882e4    | 2349.57568   | 98.0519 |
| 2      | 10.539        | VB   | 0.0961      | 88.99992     | 11.33529     | 0.8165  |
| 3      | 12.136        | VV   | 0.0782      | 123.35857    | 24.29147     | 1.1317  |

| Peak #   | RetTime [min] | Type | Width [min] | Area [mAU*s] | Height [mAU] | Area % |
|----------|---------------|------|-------------|--------------|--------------|--------|
| Totals : |               |      |             | 1.09005e4    | 2385.20244   |        |

## Compound 11k

Acq. Operator : BY  
Acq. Instrument : 1260R  
Injection Date : 4/18/2024 10:34:16 PM  
Seq. Line : 8  
Location : 68  
Inj : 1  
Inj Volume : 20.000 µl  
Different Inj Volume from Sample Entry! Actual Inj Volume : 3.000 µl  
Acq. Method : D:\Data\ZLM\DATA\20240416-2\20240416 2024-04-18 20-25-58\20240316--ZK-15MIN-35-95ACN.M  
Last changed : 4/12/2024 12:05:51 AM by BY  
Analysis Method : D:\DATA\ZLM\METHOD\AB-ACN-H2O(5-90)15MIN.M  
Last changed : 4/19/2024 12:08:24 AM by BY  
(modified after loading)  
Method Info : HYDRO RP-80A

Additional Info : Peak(s) manually integrated

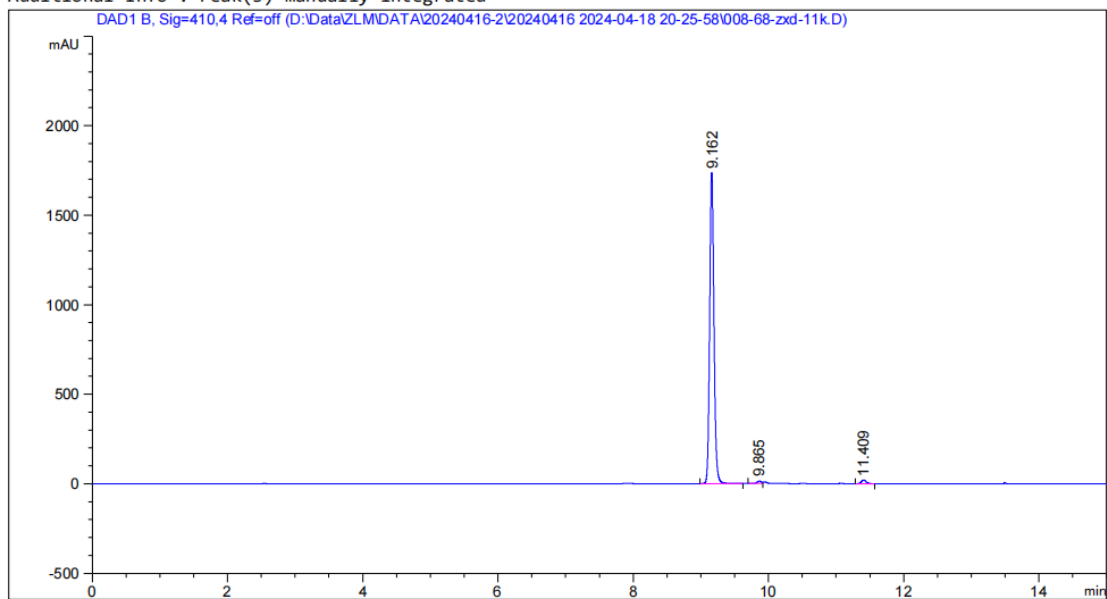

### Area Percent Report

Sorted By : Signal  
Multiplier : 1.0000  
Dilution : 1.0000  
Do not use Multiplier & Dilution Factor with ISTDs

Signal 1: DAD1 B, Sig=410,4 Ref=off

| Peak # | RetTime [min] | Type | Width [min] | Area [mAU*s] | Height [mAU] | Area %  |
|--------|---------------|------|-------------|--------------|--------------|---------|
| 1      | 9.162         | BB   | 0.0680      | 7670.71484   | 1736.94189   | 97.9726 |
| 2      | 9.865         | BV   | 0.0663      | 61.24231     | 13.92678     | 0.7822  |
| 3      | 11.409        | BB   | 0.0696      | 97.49361     | 21.03873     | 1.2452  |

  

| Peak #                         | RetTime [min] | Type | Width [min] | Area [mAU*s] | Height [mAU] | Area % |
|--------------------------------|---------------|------|-------------|--------------|--------------|--------|
| Totals : 7829.45077 1771.90741 |               |      |             |              |              |        |

## Compound 12a

Acq. Operator : BY  
Acq. Instrument : 1260R  
Injection Date : 4/12/2024 6:45:04 AM  
Seq. Line : 25  
Location : 27  
Inj : 1  
Inj Volume : 20.000 µl  
Acq. Method : D:\Data\ZXD\DATA\20240411-ZXD-1\zxd-1F\_LC 2024-04-12 00-07-33\20240316--ZK-15MIN-35-95ACN.M  
Last changed : 4/12/2024 12:05:51 AM by BY  
Analysis Method : D:\DATA\KUN\METHOD\20240204-ZK-15MIN-25-90ACN.M  
Last changed : 4/12/2024 4:29:43 PM by BY  
(modified after loading)  
Method Info : 90% H2O and 10% ACE

Additional Info : Peak(s) manually integrated

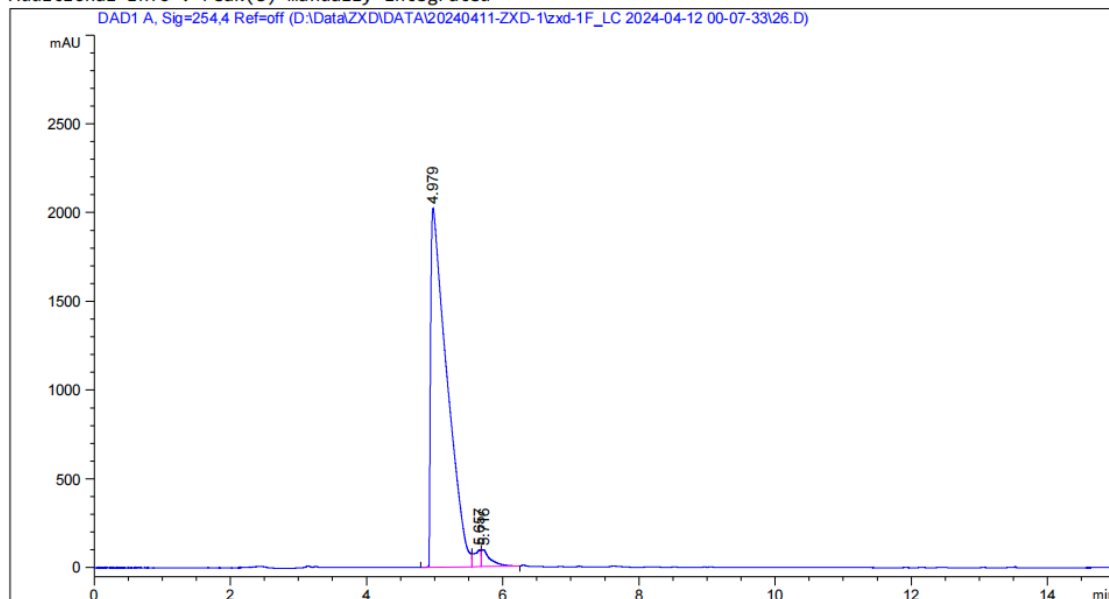

### Area Percent Report

Sorted By : Signal  
Multiplier : 1.0000  
Dilution : 1.0000  
Do not use Multiplier & Dilution Factor with ISTDs

Signal 1: DAD1 A, Sig=254,4 Ref=off

| Peak # | RetTime [min] | Type | Width [min] | Area [mAU*s] | Height [mAU] | Area %  |
|--------|---------------|------|-------------|--------------|--------------|---------|
| 1      | 4.979         | BV   | 0.2150      | 3.35267e4    | 2021.52502   | 95.6116 |
| 2      | 5.657         | VV   | 0.0903      | 648.21887    | 94.14844     | 1.8486  |
| 3      | 5.716         | VB   | 0.1238      | 890.58801    | 95.96742     | 2.5398  |

Totals : 3.50655e4 2211.64088

## Compound 12b

Acq. Operator : BY  
Acq. Instrument : 1260R  
Injection Date : 4/12/2024 7:01:33 AM  
Seq. Line : 26  
Location : 28  
Inj : 1  
Inj Volume : 20.000 µl  
Acq. Method : D:\Data\ZXD\DATA\20240411-ZXD-1\zxd-1F\_LC 2024-04-12 00-07-33\20240316--ZK-15MIN-35-95ACN.M  
Last changed : 4/12/2024 12:05:51 AM by BY  
Analysis Method : D:\DATA\KUN\METHOD\20240204-ZK-15MIN-25-90ACN.M  
Last changed : 4/12/2024 4:33:41 PM by BY  
(modified after loading)  
Method Info : 90% H2O and 10% ACE

Additional Info : Peak(s) manually integrated

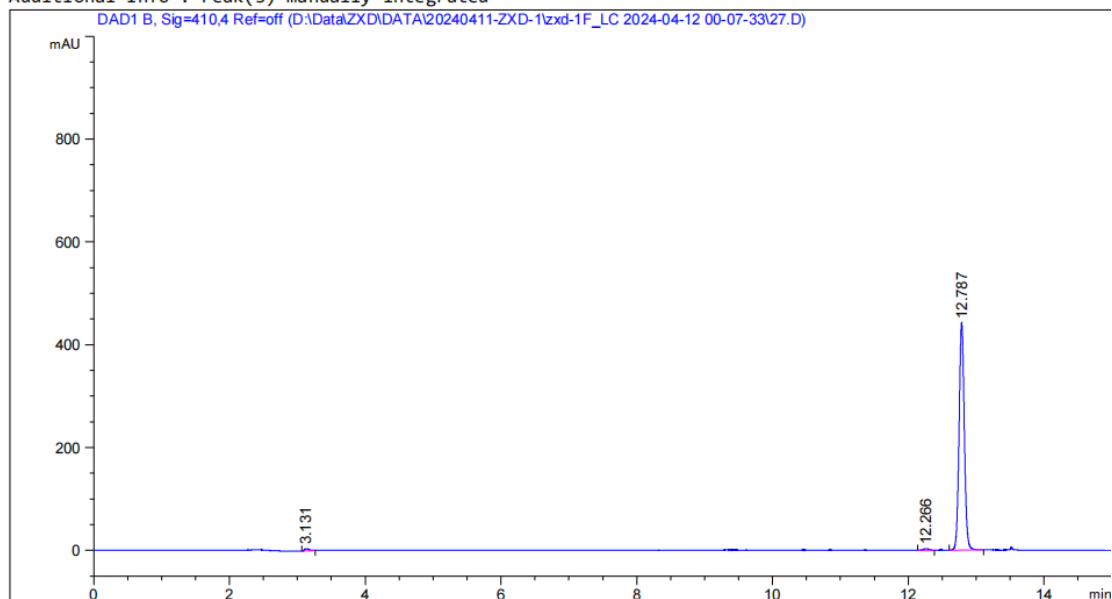

### Area Percent Report

Sorted By : Signal  
Multiplier : 1.0000  
Dilution : 1.0000  
Do not use Multiplier & Dilution Factor with ISTDs

Signal 1: DAD1 B, Sig=410,4 Ref=off

| Peak # | RetTime [min] | Type | Width [min] | Area [mAU*s] | Height [mAU] | Area %  |
|--------|---------------|------|-------------|--------------|--------------|---------|
| 1      | 3.131         | BB   | 0.0561      | 18.49863     | 4.14327      | 0.7709  |
| 2      | 12.266        | BB   | 0.0671      | 14.86164     | 2.83681      | 0.6194  |
| 3      | 12.787        | BV   | 0.0819      | 2366.18555   | 442.62436    | 98.6097 |

Totals : 2399.54582 449.60443

## Compound 12c

Acq. Operator : BY  
Acq. Instrument : 1260R  
Injection Date : 4/12/2024 9:10:26 PM  
Seq. Line : 2  
Location : 38  
Inj : 1  
Inj Volume : 20.000 µl  
Acq. Method : D:\Data\ZLM\DATA\20240412\20240412 2024-04-12 20-51-13\20240316--ZK-15MIN-35-95ACN.M  
Last changed : 4/12/2024 12:05:51 AM by BY  
Analysis Method : D:\DATA\KUN\METHOD\20240204-ZK-15MIN-25-90ACN.M  
Last changed : 4/12/2024 9:34:52 PM by BY  
(modified after loading)  
Method Info : 90% H2O and 10% ACE

Additional Info : Peak(s) manually integrated

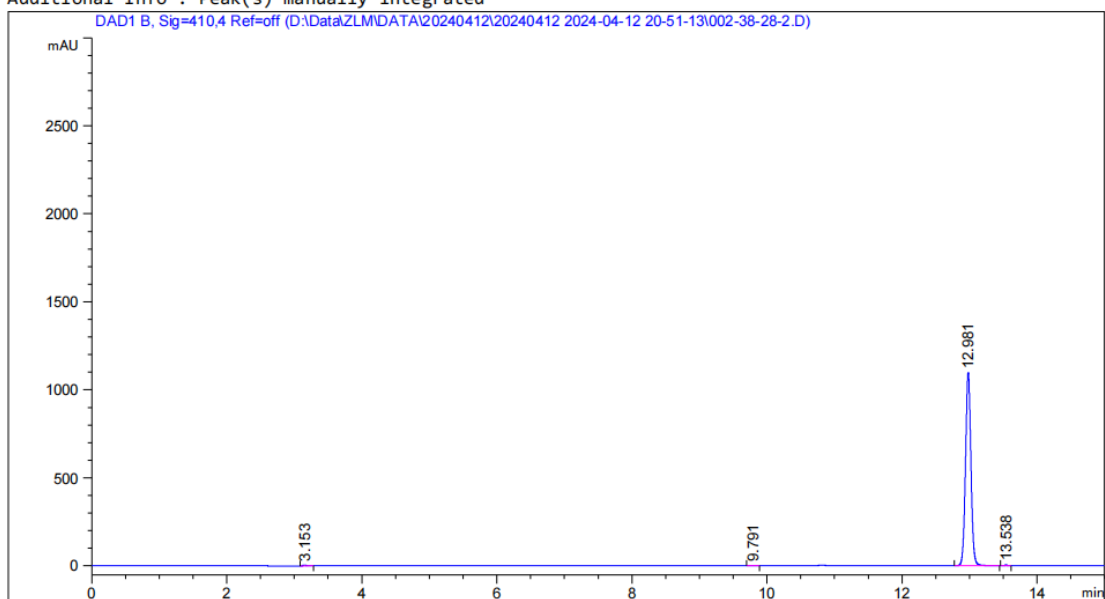

### Area Percent Report

Sorted By : Signal  
Multiplier : 1.0000  
Dilution : 1.0000  
Do not use Multiplier & Dilution Factor with ISTDs

Signal 1: DAD1 B, Sig=410,4 Ref=off

| Peak # | RetTime [min] | Type | Width [min] | Area [mAU*s] | Height [mAU] | Area %  |
|--------|---------------|------|-------------|--------------|--------------|---------|
| 1      | 3.153         | BB   | 0.0552      | 18.80663     | 4.12496      | 0.3054  |
| 2      | 9.791         | BV   | 0.0562      | 6.40597      | 1.39158      | 0.1040  |
| 3      | 12.981        | BB   | 0.0861      | 6123.86914   | 1097.54834   | 99.4461 |
| 4      | 13.538        | BB   | 0.0213      | 8.89822      | 6.35827      | 0.1445  |

## Compound 12d

Acq. Operator : BY  
Acq. Instrument : 1260R  
Injection Date : 4/12/2024 7:34:39 AM  
Seq. Line : 28  
Location : 30  
Inj : 1  
Inj Volume : 20.000 µl  
Acq. Method : D:\Data\ZXD\DATA\20240411-ZXD-1\zxd-1F\_LC 2024-04-12 00-07-33\20240316--ZK-15MIN-35-95ACN.M  
Last changed : 4/12/2024 12:05:51 AM by BY  
Analysis Method : D:\DATA\KUN\METHOD\20240204-ZK-15MIN-25-90ACN.M  
Last changed : 4/12/2024 4:50:25 PM by BY  
(modified after loading)  
Method Info : 90% H2O and 10% ACE

Additional Info : Peak(s) manually integrated

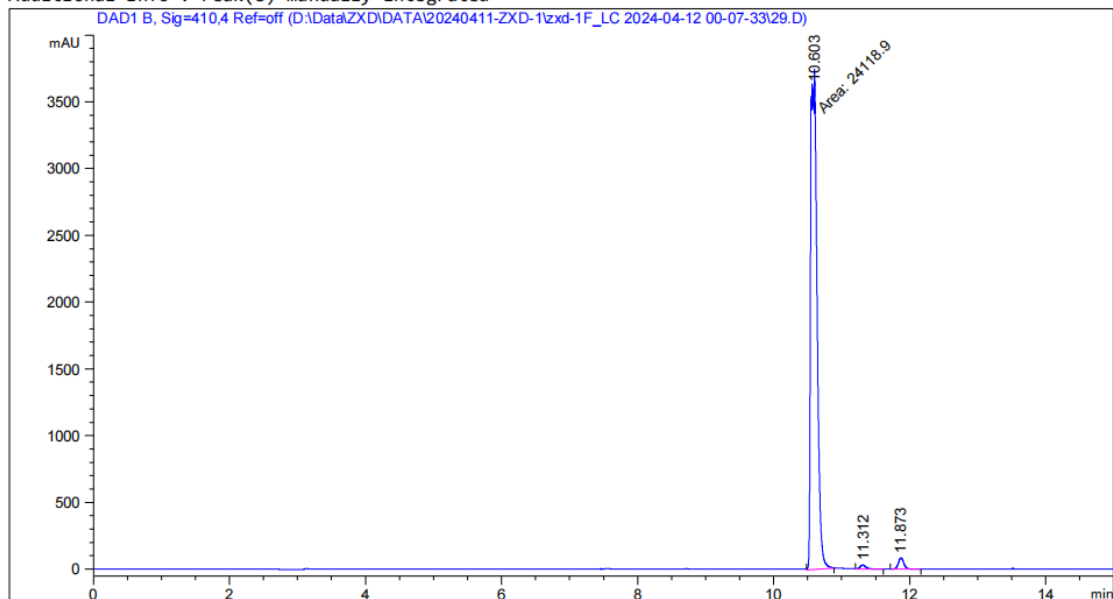

### Area Percent Report

Sorted By : Signal  
Multiplier : 1.0000  
Dilution : 1.0000  
Do not use Multiplier & Dilution Factor with ISTDs

Signal 1: DAD1 B, Sig=410,4 Ref=off

| Peak # | RetTime [min] | Type | Width [min] | Area [mAU*s] | Height [mAU] | Area %  |
|--------|---------------|------|-------------|--------------|--------------|---------|
| 1      | 10.603        | MM   | 0.1074      | 2.41189e4    | 3743.87427   | 97.4569 |
| 2      | 11.312        | VB   | 0.0855      | 170.47946    | 29.24509     | 0.6889  |
| 3      | 11.873        | BB   | 0.0845      | 458.89401    | 83.68165     | 1.8542  |

## Compound 12e

Acq. Operator : BY  
Acq. Instrument : 1260R  
Injection Date : 4/18/2024 10:50:43 PM  
Seq. Line : 9  
Location : 69  
Inj : 1  
Inj Volume : 20.000 µl  
Different Inj Volume from Sample Entry! Actual Inj Volume : 3.000 µl  
Acq. Method : D:\Data\ZLM\DATA\20240416-2\20240416 2024-04-18 20-25-58\20240316--ZK-15MIN-35-95ACN.M  
Last changed : 4/12/2024 12:05:51 AM by BY  
Analysis Method : D:\DATA\ZLM\METHOD\AB-ACN-H2O(5-90)15MIN.M  
Last changed : 4/19/2024 12:09:41 AM by BY  
(modified after loading)  
Method Info : HYDRO RP-80A

Additional Info : Peak(s) manually integrated

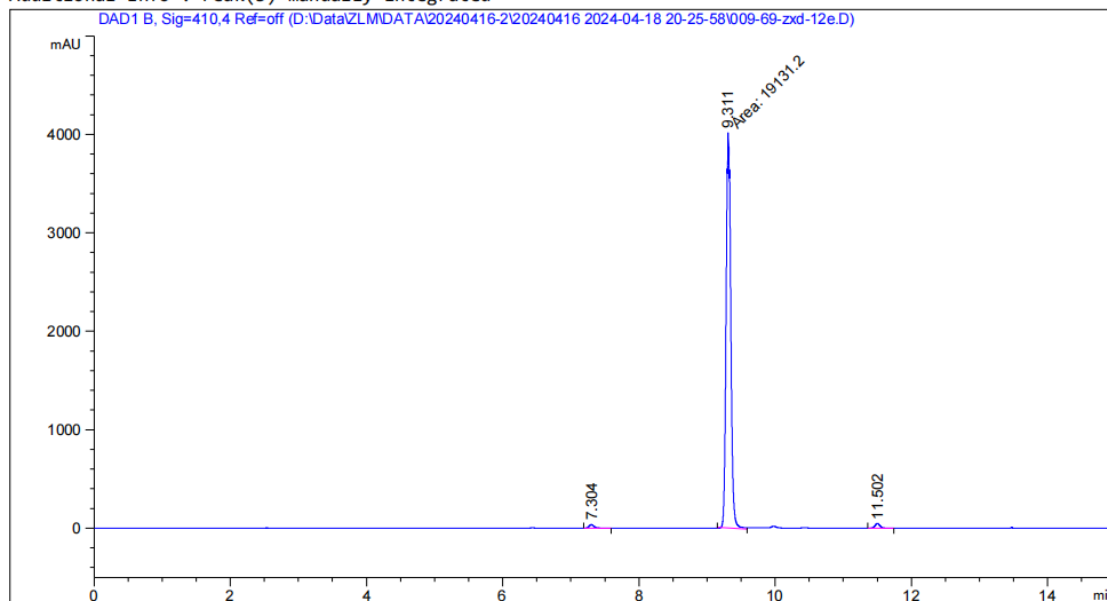

### Area Percent Report

Sorted By : Signal  
Multiplier : 1.0000  
Dilution : 1.0000  
Do not use Multiplier & Dilution Factor with ISTDs

Signal 1: DAD1 B, Sig=410,4 Ref=off

| Peak # | RetTime [min] | Type | Width [min] | Area [mAU*s] | Height [mAU] | Area %  |
|--------|---------------|------|-------------|--------------|--------------|---------|
| 1      | 7.304         | BB   | 0.0712      | 166.36632    | 34.84110     | 0.8523  |
| 2      | 9.311         | MM   | 0.0793      | 1.91312e4    | 4023.17847   | 98.0124 |
| 3      | 11.502        | BB   | 0.0716      | 221.59727    | 47.35620     | 1.1353  |

| Peak #   | RetTime [min] | Type | Width [min] | Area [mAU*s] | Height [mAU] | Area % |
|----------|---------------|------|-------------|--------------|--------------|--------|
| Totals : |               |      |             |              |              |        |
|          |               |      |             | 1.95192e4    | 4105.37577   |        |

## Compound 12f

Acq. Operator : BY Seq. Line : 30  
Acq. Instrument : 1260R Location : 32  
Injection Date : 4/12/2024 8:07:36 AM Inj : 1  
Inj Volume : 20.000 µl  
Acq. Method : D:\Data\ZXD\DATA\20240411-ZXD-1\zxd-1F\_LC 2024-04-12 00-07-33\20240316--ZK-15MIN-35-95ACN.M  
Last changed : 4/12/2024 12:05:51 AM by BY  
Analysis Method : D:\DATA\KUN\METHOD\20240204-ZK-15MIN-25-90ACN.M  
Last changed : 4/12/2024 4:57:03 PM by BY  
(modified after loading)  
Method Info : 90% H2O and 10% ACE

Additional Info : Peak(s) manually integrated

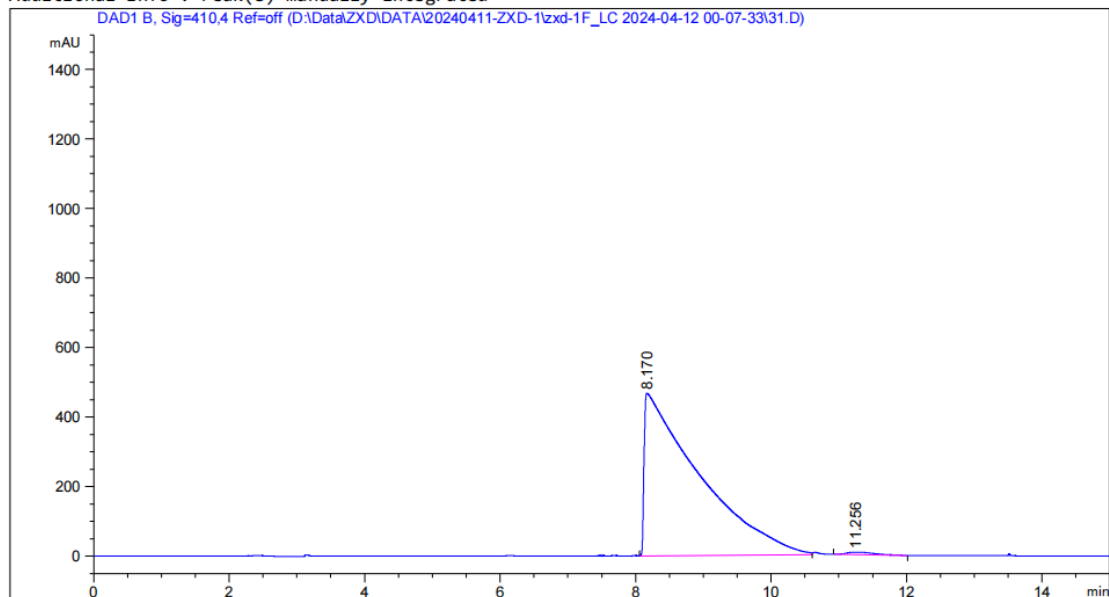

### Area Percent Report

Sorted By : Signal  
Multiplier : 1.0000  
Dilution : 1.0000  
Do not use Multiplier & Dilution Factor with ISTDs

Signal 1: DAD1 B, Sig=410,4 Ref=off

| Peak # | RetTime [min] | Type | Width [min] | Area [mAU*s] | Height [mAU] | Area %  |
|--------|---------------|------|-------------|--------------|--------------|---------|
| 1      | 8.170         | BV   | 0.6742      | 2.61960e4    | 467.89276    | 99.2207 |
| 2      | 11.256        | BB   | 0.3338      | 205.75861    | 7.22474      | 0.7793  |

Totals : 2.64017e4 475.11750

## References

1. Costa G, Rocca R, Corona A, Grandi N, Moraca F, Romeo I, Talarico C, Gagliardi MG, Ambrosio FA, Ortuso F, Alcaro S, Distinto S, Maccioni E, Tramontano E, Artese A. Novel natural non-nucleoside inhibitors of HIV-1 reverse transcriptase identified by shape- and structure-based virtual screening techniques. *Eur J Med Chem.* **2019**, 1(161), 1-10.
2. Corona A, Meleddu R, Esposito F, Distinto S, Bianco G, Masaoka T, Maccioni E, Menéndez-Arias L, Alcaro S, Le Grice SF, Tramontano E. Ribonuclease H/DNA Polymerase HIV-1 Reverse Transcriptase Dual Inhibitor: Mechanistic Studies on the Allosteric Mode of Action of Isatin-Based Compound RMNC6. *PLoS One.* **2016**, 11, (1), e0147225.
3. Corona A, Schneider A, Schweimer K, Rösch P, Wöhrl BM, Tramontano E. Inhibition of foamy virus reverse transcriptase by human immunodeficiency virus type 1 RNase H inhibitors. *Antimicrob Agents Chemother.* **2014**, 58, (7), 4086-4093.
4. Messore A, Corona A, Madia VN, Saccoliti F, Tudino V, De Leo A, Scipione L, De Vita D, Amendola G, Di Maro S, Novellino E, Cosconati S, Métifiot M, Andreola ML, Valenti P, Esposito F, Grandi N, Tramontano E, Costi R, Di Santo R. Pyrrolyl Pyrazoles as Non-Diketo Acid Inhibitors of the HIV-1 Ribonuclease H Function of Reverse Transcriptase. *ACS Med Chem Lett.* **2020**, 11, (5), 798-805.
